# Supplementary material for: Site-Dependent Relationships Between Fungal Community Composition, Plant Genotypic Diversity and Environmental Drivers in a Salix Biomass System
Source: Front Fungal Biol. 2021 Aug 13;2:671270. doi: 10.3389/ffunb.2021.671270 (PMC10512226; doi:10.3389/ffunb.2021.671270)
Supplement: Supplementary file 1 [file Table_1.xlsx]

## Sheet: Table S1
Table S1. Identity, functional group assignment, exploration type (for ECM fungi), and UNITE accession and species hypothesis (SH) codes for the representative sequence of the 446 most common operational taxonomic units (OTUs) or study-level SHs.
														References
1 When comparing representative sequences from each study-level SHs to all global SHs in UNITE using massBLASTER, some sequences are locked by the author and alignments are not shown, resulting in not available score and percent identity match values														a Agerer, R. (2001) Exploration types of ectomycorrhizae - A proposal to classify ectomycorrhizal mycelial systems according to their patterns of differentiation and putative ecological importance. Mycorrhiza 11, 107-114. doi: 10.1007/s005720100108
2 Exploration type given for ECM fungi (references given above column)														b Tedersoo, L., Hansen, K., Perry, B. A., and Kjøller, R. (2006) Molceular and morphological diversity of pezizalean ectomycorrhiza. New Phytol. 170, 581-596. doi: 10.1111/j.1469-8137.2006.01687.x.
3 Some sequences were not recognized by the ITS extractor software and were not included in the species hypothesis clustering														c Lilleskov, E. A., Hobbie, E. A., and Horton, T. R. (2011) Conservation of ectomycorrhizal fungi: exploring the linkages between funtional and taxonomic responses to anthropogenic N deposition. Fungal Ecol. 4, 174-183. doi: 10.1016/j.funeco.2010.09.008
4 Respresentative sequences are available in the NCBI Sequence Read Archive under the accession number PRJNA703824.														d Edible ectomycorrhizal mushrooms: current knowledge and future prospects (2012), eds. Zambonelli, A., Bonito, G. M. (New York, NY: Springer), pp 24-25. doi 10.1007/978-3-642-33823-6
5 No match in Unite, blasted in NCBI														e Katanic´, M., Paoletti, E., Orlovic´, S., Grebenc, T., and Kraigher, H. (2014) Mycorrhizal status of an ozone-sensitive poplar clone treated with the antiozonant ethylene diurea. E. J. For. Res. 133, 735-743. doi: 10.1007/s10342-013-0751-9
														f Agerer, R. (2006) Fungal relationships and structural identity of their ectomycorrhizae. Mycol. Prog. 5, 67-107
										FUNGuild functional group assignments					UNITE accession and identfication3
OTU	Number of reads	Division	Subdivision	Class	Subclass	Order	Family	Genus	Identification 1	Trophic Mode	Guild	Confidence Ranking	Growth Morphology	Exploration type 2	Accession code	Species hypothesis code	Score	Percent identity match	Representative sequence4
OTU 1	75479	Ascomycota							Ascomycota	-	-	-	-		UDB024264		89.1	72.51	AACGCACATGGCGCCTTCCAGTATCCTGGGAGGCATGCCTGTCCGAGCGTCGTTTCAACCCTCGAGCCCCCGTGGCCCGGCGTTGGGGATCTGCCCAGGCAGTCCCCGAAAACCAGTGGCGGACCCGTTGGGCCCTTCCTTTGCGTAGTAACATCTGCCTCGCATCGGGAGCCTGCGGGCTATCCGGCCTCTAAACCCCCCTCAAGCCCGCTCCGGCGGCACCAAGGTTGACCTCGGATCAGGTAGGAATACCCGCTGAACTTAA
OTU 2	57389	Ascomycota	Pezizomycotina	Leotiomycetes	Leotiomycetidae	Helotiales	Hyaloscyphaceae	Pezizella	Pezizella sp.	Pathotroph-Saprotroph-Symbiotroph	Bryophyte Parasite-Lichen Parasite-Ectomycorrhizal-Ericoid Mycorrhizal-Undefined Saprotroph	Possible	Microfungus		UDB019834	SH1648851.08FU	257.4	90.09	AACGCACATTGCGCCCCTTGGTATTCCGAGGGGCATGCCTATTCGAGCGTCATTATCACCCCTCAAGCCTAGCTTGGTGTTGAGACCTGCTGTCAAGGCAGTCTCTAAAATCAGTGGCAGTGCTGTCAGGCTCTAAGCGTAGTAAATTCATCGCTATAGGGTCCTGGTGGATACTCGTCAGAACCCCCCCATTTTTTAATGATTGACCTCGGATTAGGTAGGGATACCCGCTGAACTTAA
OTU 3	37658	Ascomycota	Pezizomycotina	Leotiomycetes	Leotiomycetidae	Helotiales	Dermateaceae	Pyrenopeziza	Pyrenopeziza millegrana 1	Pathotroph	Plant Pathogen	Probable	NULL		UDB003071	SH1545961.08FU			AACGCACATTGCGCCCTCTGGTATTCCGGGGGGCATGCCTGTTCGAGCGTCATTATAACCACTCAAGCTCTCGCTTGGTATTGGGGTTCGCGGTTTCGCGGCCCCTAAAATCAGTGGCGGTGCCTGTCGGCTCTACGCGTAGTAATACTCCTCGCGATTGAGTCCGGTAGGTCTACTTGCCAGCAACCCCTAATTTTTTTAAGGTTGACCTCGGATCAGGTAGGGATACCCGCTGAACTTAA
OTU 4	36759	Ascomycota	Pezizomycotina	Dothideomycetes	Pleosporomycetidae	Pleosporales			Pleosporales	-	-	-	-		UDB028324		262.5	86.61	AACGCACATTGCGCCCCTTGGTATTCCATGGGGCATGCCTGTTCGAGCGTCATTTGTACCTTCAAGCTCTGCTTGGTGTTGGGTGTTTGTCTCGCCTTTGCGTGTAGACTCGCCTCAAAACAATTGGCAGCCGGCGTATTGATTTCGGAGCGCAGTACATCTCGCGCTTTGCACTCATAACGACGACGTCCAAAAGTACATTTTTACACTCTTGACCTCGGATCAGGTAGGGATACCCGCTGAACTTAA
OTU 5	31206	Ascomycota	Pezizomycotina	Dothideomycetes	Dothideomycetidae	Capnodiales	Cladosporiaceae	Cladosporium	Cladosporium delicatulum	Pathotroph-Saprotroph-Symbiotroph	Animal Pathogen-Endophyte-Lichen Parasite-Plant Pathogen-Wood Saprotroph	Possible	Microfungus		UDB035710	SH1572792.08FU	418.7	100.0	AACGCACATTGCGCCCCCTGGTATTCCGGGGGGCATGCCTGTTCGAGCGTCATTTCACCACTCAAGCCTCGCTTGGTATTGGGCAACGCGGTCCGCCGCGTGCCTCAAATCGACCGGCTGGGTCTTCTGTCCCCTAAGCGTTGTGGAAACTATTCGCTAAAGGGTGTTCGGGAGGCTACGCCGTAAAACAACCCCATTTCTAAGGTTGACCTCGGATCAGGTAGGGATACCCGCTGAACTTAA
OTU 6	21560	Ascomycota	Pezizomycotina	Sordariomycetes	Hypocreomycetidae	Hypocreales	Nectriaceae		Nectriaceae	Saprotroph	Undefined Saprotroph	Possible	Microfungus		UDB027680	SH1546325.08FU	312.3	89.96	AACGCACATTGCGCCCGCCAGTATTCTGGCGGGCATGCCTGTTCGAGCGTCATTTCAACCCTCAAGCCCCCGGGCTTGGTGTTGGGGCTCGGCCCGTCCCTAGCGGCGCGCCGTCCCCGAAATCTAGTGGCGGTCACGCTGTACTCCTCTGCGTAGTAATCTAACCTCGCAACGGGACAAAGCGCGGCCACGCCGTTAAACCCCCAACTTCTGAAGGTTGACCTCGGATCAGGTAGGAATACCCGCTGAACTTAA
OTU 7	20719	Basidiomycota	Agaricomycotina	Agaricomycetes	Agaricomycetidae	Agaricales	Inocybaceae	Inocybe	Inocybe curvipes 1	Symbiotroph	Ectomycorrhizal	Probable	Agaricoid	Short-distance a	UDB022349	SH1566521.08FU			AACGCATCTTGCGCTCCTTGGTATTCCGAGGAGCATGCCTGTTTGAGTGTCATCAATCTCTCAACTACATCAATCTTTCTGGTTTGGTGTAGCCTTTGGATGTGGGGGTTTTATTTTGCTGGCCTCTATTAAACGAGGTCAGCTCCCCTGAAATTTATTAGCGGTATCTGAGCAGAGACCTACTACAGGTGTGATAAATTATCTATGCCTTGGTAATGCTGCATCAACAGATTGTGCTGCTTCCAGTGAATCATTTGACAAATTTGACCTCAAATCAGGTAGGACTACCCGCTGAACTTAA
OTU 8	17371	Basidiomycota	Agaricomycotina	Agaricomycetes	Agaricomycetidae	Agaricales	Hymenogastraceae	Hebeloma	Hebeloma alpinum	Symbiotroph	Ectomycorrhizal	Highly Probable	Agaricoid	Short- or medium-distance fringe subtype a, f	UDB037470	SH1563785.08FU	528.6	100.0	AACGCACCTTGCGCTCCTTGGTATTCCGAGGAGCATGCCTGTTTGAGTGTCATTAAATTCTCAACCATTATCAACTTTTGCTGATAATGGCTTGGATGTGGGGGTCTATTTTGCTGGCTTCTCAGATAGTCAGCTCCCCTTAAATGCATTAGCCGGTGCCCCGCGTGGACTGTCTATTGGTGTGATAATTATCTACGCTATAGACATCTGCAATCATATGGGTTTGCGCTGCTTCTAACAGTCTGTTGATTCAGACAATACATGACAATTTGACCTCAAATCAGGTAGGACTACCCGCTGAACTTAA
OTU 9	14881	Mortierellomycota	Mortierellomycotina	Mortierellomycetes	Mortierellomycetes	Mortierellales	Mortierellaceae	Mortierella	Mortierella sp.	Saprotroph-Symbiotroph	Endophyte-Litter Saprotroph-Soil Saprotroph-Undefined Saprotroph	Possible	Microfungus		UDB027447	SH1557013.08FU	502.9	94.8	AACGCATATTGCGCTCTTTGGTATTCCGAAGAGCATGCTTGTTTGAGTATCAGTAAACACCTCAAAGCTTTTGGATTTTTTAATCGAAAAGCTTTGGACTTGAGCAATCCCAACACCAATCTTTTTGAGATCGGTGGCGGGTTGCTTGAAATGCAGGTGCAGCTGGACATTCTCCTGAGCTAAAAGCATATTCATTTAGTCCCGTCAAACGGATTATTACTTTTGCTGCAGCTAACATAAAGGGAGTTTGACCGTATTGGCTGACTGATGCAGGATTTCACAAGGGTCGGCAACGATTCTTGTTAAACTCGATCTCAAATCAAGTAAGACTACCCGCTGAACTTAA
OTU 10	14673	Ascomycota	Pezizomycotina	Sordariomycetes	Hypocreomycetidae	Hypocreales	Nectriaceae	Gibberella	Gibberella tricincta	Pathotroph	Plant Pathogen	Probable	NULL		UDB035699	SH1546323.08FU	444.5	100.0	AACGCACATTGCGCCCGCTGGTATTCCGGCGGGCATGCCTGTTCGAGCGTCATTTCAACCCTCAAGCCCCCGGGTTTGGTGTTGGGGATCGGCTCTGCCTTCTGGCGGTGCCGCCCCCGAAATACATTGGCGGTCTCGCTGCAGCCTCCATTGCGTAGTAGCTAACACCTCGCAACTGGAACGCGGCGCGGCCATGCCGTAAAACCCCAACTTCTGAATGTTGACCTCGGATCAGGTAGGAATACCCGCTGAACTTAA
OTU 11	14136	Ascomycota	Pezizomycotina	Sordariomycetes	Sordariomycetidae	Diaporthales	Gnomoniaceae	Plagiostoma	Plagiostoma sp. 1	Saprotroph	Undefined Saprotroph	Probable	NULL		UDB034055	SH1596907.08FU			AACGCACATTGCGCCCGGTGGTATTCCACCGGGCATGCCTGTTCGAGCGTCATTTCAACCCTCAAAGCCTAGCTTTGGTGTTGGAGGAAGACCTGTAAAAAGGTCCCCTCCCAAATTTAGTGGCGGGCTCGCTAGAATTTTGAGCGTAGTAATTCAACAACGTTTTTAAATACTAGTGGGACTTCTAGCCGTAAAACCCCCCAACTTTCTGAAAATTGACCTCGGATCAGGTAGGAATACCCGCTGAACTTAA
OTU 12	13807	Ascomycota							Ascomycota	-	-	-	-		UDB015467	SH1507875.08FU	176.7	79.84	AACGCACATTGCGCCCATTAGTATTCTAGTGGGCATGCCTGTTCGAGCGTCATTTCAACCCTTAAGCCTAGCTTAGTATTGGGAACTGGCTTTACTGCCATTCCTCAAATTCAACGGCGGATTTATAGCAATCTCTGAACGTAGTAATTTTTTTCTCGTTTTTGAAATACTGTAAACCTCAGCCGCTAAACCCCCCAATTTTTAATGGTTGACCTCGGATCAGGTAGGAATACCCGCTGAACTTAA
OTU 13	11837	Ascomycota	Pezizomycotina	Dothideomycetes	Pleosporomycetidae	Pleosporales			Pleosporales	-	-	-	-		UDB028324		204.1	82.4	AACGCACATTGCGCCCCTTGGTATTCCATGGGGCATGCCTGTTCGAGCGTCATTTGTACCTTCAAGCTTTGCTTGGTGTTGGGTGTTTGTCCTGAGGGACTCGCCTTAAAGTAATTGGCAGCCAGTGTTTGGTTTTGAAGCGCAGCACAAGTCGCGATTCAAAGCTATACGCCCGCTTCCACAAGCCTTTTTCACTTTTGACCTCGGATCAGGTAGGGATACCCGCTGAACTTAA
OTU 14	9018	Ascomycota	Pezizomycotina	Pezizomycetes	Pezizomycetidae	Pezizales	Pyronemataceae		Pyronemataceae	Saprotroph-Symbiotroph	Dung Saprotroph-Ectomycorrhizal-Soil Saprotroph-Wood Saprotroph	Possible	Gasteroid-Pezizoid		UDB011013	SH1637466.08FU	302.0	88.93	AACGCACATTGCGCCTCCTGGTAATCCGTGAGGCATGCCTGTTCGAGCGTCACCAAAATCAAATCAACCACTCCGGTGATTGGTCATGGAGGAAGAGTCCGTCGTGTTGTGGTCTCCCCTCCCAAAATAAATGGCGGAAAGTTGCTGGCACTCGGTGTAGGAGTATTATTCGCCGATTGTCCAGTGTCGTTCCTGCCGTCAAATCCCCACAATTATCTTGATTGACCTCGGATCAGGTAGGGATACCCGCTGAACTTAA
OTU 15	7859	Ascomycota	Pezizomycotina	Leotiomycetes	Leotiomycetidae	Helotiales	Hyaloscyphaceae	Ciliolarina	Ciliolarina sp.	Saprotroph	Undefined Saprotroph	Probable	NULL		UDB034371	SH1522560.08FU	305.4	90.95	AACGCACATTGCGCCCTGTGGTATTCCGCAGGGCATGCCTGTTCGAGCGTCAGTACAACACTCAAGCCTAGCTTGGTCTTGGGCCTCGCCGGAGACGGCGGGCCTTAAAATCAGTGGCGGCGCCTCTCGGGCCCTAAGCGTAGTAATACTCCTCGCTACAGGGACCCGGTGGACGCTGGCCAGCAACCCCCAACTTTCTAAGTTTGACCTCGGATCAGGTAGGGATACCCGCTGAACTTAA
OTU 16	7813	Ascomycota	Pezizomycotina	Eurotiomycetes	Chaetothyriomycetidae	Chaetothyriales	Herpotrichiellaceae	Exophiala	Exophiala sp.	Pathotroph-Saprotroph	Animal Pathogen-Undefined Saprotroph	Probable	Facultative Yeast		UDB027982	SH1635779.08FU	473.7	98.94	AACGCACATTGCGCCCTTTGGTATTCCGAAGGGCATGCCTGTTCGAGCGTCATTATCACCCCTCAAGCCCTCGGCTTGGTGTTGGACGGTTTGGTGGAGGCCCCCTCGGGGGCTCCTGCCCCTCCCAAAGACAATGACGGCGGCCTCGTTGGACCCCCGGTACACTGAGTTCTTCACGGGACACGTATCGGACACATGGGTTTACGGGACACGGTCTGCCTCCCCTCAGGGAGAATCTTTCTAAGGTTGACCTCGGATCAGGTAGGGATACCCGCTGAACTTAA
OTU 17	7784	Ascomycota	Pezizomycotina	Leotiomycetes	Leotiomycetidae	Helotiales			Helotiales 1	-	-	-	-		UDB032140	SH1509644.08FU			AACGCACATTGCGCCCCTTGGTATTCCGGGGGGCATGCCTGTTCGAGCGTCATTATCACCCCTCAAGCTCAGCTTGGTGTTGGGGCCTGCCCGTCACAGGGCAGCCCTTAAAAGCAGTGGCGGTGCCATCTGGCTCTACGCGTAGTAATACTCCTCGCGACAGAGTCCCGGTGGTGTCCTGCCAGAACCCCCCATATTTTTAATGATTGACCTCGGATCAGGTAGGGATACCCGCTGAACTTAA
OTU 18	5890	Ascomycota	Pezizomycotina	Leotiomycetes	Leotiomycetidae	Helotiales	Hyaloscyphaceae	Lasiobelonium	Lasiobelonium lanceolatum	Saprotroph	Undefined Saprotroph	Probable	NULL		UDB034369	SH1648542.08FU	391.3	98.33	AACGCACATTGCGCCCCTTGGTATTCCGAGGGGCATGCCTGTTCGAGCGTCATTTAAACCAATCTAGCTCTGCTAGGTCTTGGGCCTCGCCGTCTGGCGGGCCTTAAAACCAGTGGCGGTACTGCCAGGCTTCTAAGCGTAGTAAATCTCTCGCTATAGGGCCCTGGCGGATGCTGGCCAGCAACCCCCCATTTTTTCAGGTTGACCTCGGATCAGGTAGGGATACCCGCTGAACTTAA
OTU 19	5672	Ascomycota	Pezizomycotina	Sordariomycetes					Sordariomycetes 1	-	-	-	-		UDB024433	SH1648729.08FU			AACGCACATTGCGCCCGCTAGTATTCTGGCGGGCATGCCTGTTCGAGCGTCATTTCAACCATCAAGCCCTAGGCTTGTGTTGGGGCCCTGCGGCCGTCCGCAGCCCCCTAAAAACAGTGGCGGGCTCGCTATATACCGAGTGCAGTAGTTTACTCTTCGCTCAGGACATGTAGTGGGTTCTTGCCGTAAAACCCCCCATTTTTTAAGGTTGACCTCGGATCAGGTAGGAATACCCGCTGAACTTAA
OTU 20	4797	Ascomycota	Pezizomycotina	Eurotiomycetes	Eurotiomycetidae	Eurotiales	Aspergillaceae	Penicillium	Penicillium sp.	Saprotroph	Undefined Saprotroph	Possible	Microfungus		UDB027985	SH1529996.08FU	369.0	94.21	AACGCACATTGCGCCCCCTGGTATTCCGGGGGGCATGCCTGTCCGAGCGTCATTGCTGCCCTCAAGCACGGCTTGTGTGTTGGGCCTCCGTCCTCCTCCCGGGGGACGGGCCCGAAAGGCAGCGGCGGCACCGCGTCCGGTCCTCGAGCGTATGGGGCTTCGTCACCCGCTCTTGTAGGCCCGGCCGGCGCTTGCCGACACATCAATCTTTTTTCCAGGTTGACCTCGGATCAGGTAGGGATACCCGCTGAACTTAA
OTU 21	4650	Ascomycota	Pezizomycotina	Sordariomycetes					Sordariomycetes 1	-	-	-	-		UDB024433	SH1648729.08FU			AACGCACATTGCGCCCGCTAGTATTCTGGCGGGCATGCCTGTTCGAGCGTCATTTCAACCATCAAGCCCCCGGCTTGCGTTGGAGCCCTGCGGCTGCCGCAGGCTCCCAAATCCAGTGGCGGGCTCGTCGTCGTACCGAGTGCAGTAAACATCCTCGCTCAGGGAACGTGACGGGTTCTTGCCGTGAAACCCCCCACATATCAAGGTTGACCTCGGATCAGGTAGGAATACCCGCTGAACTTAA
OTU 22	4645	Ascomycota	Pezizomycotina	Sordariomycetes	Hypocreomycetidae	Hypocreales	Bionectriaceae		Bionectriaceae	Saprotroph	Undefined Saprotroph	Possible	Microfungus		UDB027994	SH1522833.08FU	315.7	90.04	AACGCACATTGCGCCCGCCAGTATTCTGGCGGGCATGCCTGTCTGAGCGTCATTTCAACCCTCATGCCCCTAGGGCGTGGTGTTGGGGATCGGCCAAAGCCCGCGAGGGACGGCCGGCCCCTAAATCTAGTGGCGGACCCGTCGTGGCCTCCTCTGCGAAGTAGTGATATTCCGCATCGGAGAGCGACGAGCCCCTGCCGTTAAACCCCCAACTTTCCAAGGTTGACCTCAGATCAGGTAGGAATACCCGCTGAACTTAA
OTU 23	4437	Basidiomycota	Agaricomycotina	Agaricomycetes	Phallomycetidae	Gomphales	Lentariaceae	Lentaria	Lentaria afflata 1	Saprotroph	Undefined Saprotroph	Probable	Clavarioid		UDB035003	SH1510084.08FU			AACGCACCTTGCGCTCCTTGGCATTCCGAGGAGCATGCCTGTTTGAGTGTCGTCAAATTCTCACTACCCGTGCTGTCTGATGTGGATGGACAACGTCCAATACACCTTCAAGACAGTGGGGCCTGGATCGGTGGAGGATGCATTGCTGGCAGCTAACCCCTTTGCTTTGCTTTGCTTCTCTGAAATGGATCGGCGTCACGGCTTCGTTGTCGGTATGATACACATACATGTCTTACCTGCTTCCTACCTGTGCCAGCCTTGAACACAAACACACTCTCACGATTTGACCTCAAATCAGGCAGGACTACCCGCTGAACTTAA
OTU 24	4275	Ascomycota	Pezizomycotina	Leotiomycetes	Leotiomycetidae	Helotiales	Hyaloscyphaceae		Hyaloscyphaceae	Saprotroph	Plant Saprotroph-Wood Saprotroph	Probable	Microfungus		UDB018840	SH1522943.08FU	241.9	85.95	AACGCACATTGCGCCCTCTGGTATTCCGGAGGGCATGCCTGTTCGAGCGTCATTATGACCAACTCACCTCACGGTGGTCTTGGGGCTGGCTGTCAAGCCTCCCTTAAAATCAGTGGCGGTGCTCTCAAGCTCTAAGCGTAGTAACTTTTCTCGCTACAGGGTCTCGAGGGTATCTTGCCAGCAACCCCAATCTTTTCAAGGTTGACCTCGGATCAGGTAGGGATACCCGCTGAACTTAA
OTU 25	3905	Ascomycota	Pezizomycotina	Sordariomycetes					Sordariomycetes 1	-	-	-	-		UDB024433	SH1648729.08FU			AACGCACATTGCGCCCGCTAGTATTCTGGCGGGCATGCCTGTTCGAGCGTCATTTCAACCATCAAGCGCCTGCGCTTGTGTTGGAGCCCTGCGGCTGCCGCAGGCTCCCAAACCCAGTGGCGGGCTCGTCGTCGTACCGAGTGCAGTAAACTTACCACGCTCAGGGCACGCGACGGGTGACCGGCCGTAAAACCCCCCCCTTCTCAAGGTTGACCTCGGATCAGGTAGGAATACCCGCTGAACTTAA
OTU 26	3840	Ascomycota	Pezizomycotina	Leotiomycetes	Leotiomycetidae	Helotiales			Helotiales	Saprotroph-Symbiotroph	Ectomycorrhizal-Fungal Parasite-Plant Pathogen-Wood Saprotroph	Probable	Microfungus		UDB028187	SH1523754.08FU	226.5	84.49	AACGCACATTGCGCCCCTTGGTATTCCGAGGGGCATGCCTGTTCGAGCGTCATTATCACCCCTCAAGCCTAGCTTGGTGTTGGGGCTCGCTGTAAAGGCGGCCCTTAAAATCAGTGGCAGTGTCTTCCAGACTCTAAGCGTAGTAATAACGCCGCTATAGAGTGCTGTGGGCGCGCGCCAAAACCCCAAATTTTTTACGATTGACCTCGAATCAGGTAGGGATACCCGCTGAACTTAA
OTU 27	3764	Mortierellomycota	Mortierellomycotina	Mortierellomycetes	Mortierellomycetes	Mortierellales	Mortierellaceae	Mortierella	Mortierella sp.	Saprotroph-Symbiotroph	Endophyte-Litter Saprotroph-Soil Saprotroph-Undefined Saprotroph	Possible	Microfungus		UDB027625	SH1607998.08FU	557.8	98.81	AACGCATATTGCGCTCTTTGGTATTCCGAAGAGCATGCTTGTTTGAGTATCAGTAAACACCTCAACCTCTCTTTTTTGATAAAAAAAAGGGAGGGTGGACTTGAGCTATCCCAACGACCTTCACCGGTAGGCGGGCGGCTTGAAATGCAGGTGCAGCTGGACTTTTATCTGAGCTAAAAGCATATCTATTTAGTCCTCGTCAAACAGGATTATTACTTTTGCTGCAGCTAACATAAAGGATAATTGTCCTCTTTGCTGACTGATGCAGGATTTTACGACACTTTATGTGTTGTTCAACTCGATCTCAAATCAAGTAAGACTACCCGCTGAACTTAA
OTU 28	3708	Ascomycota	Pezizomycotina	Sordariomycetes					Sordariomycetes 1	-	-	-	-		UDB024433	SH1648729.08FU			AACGCACATTGCGCCCGCCAGTATTCTGGCGGGCATGCCTGTTCGAGCGTCATTTCAACCATCAAGCCCCAGGCTTGTGTTGGGGCCCTGCGGCTGCCGCAGGCCCTGAAAAACAGTGGCGGGCTCGCTGTCACACCGAGCGTAGTAATACATCTCGCTTTGGACGTGCAGCGGGTTCTTGCCGTTAAACACCCCCCTTCTCAAGGTTGACCTCGGATCAGGTAGGAATACCCGCTGAACTTAA
OTU 29	3445	Ascomycota	Pezizomycotina	Leotiomycetes	Leotiomycetidae	Helotiales			Helotiales 1	-	-	-	-		UDB032140	SH1509644.08FU			AACGCACATTGCGCCCCTTGGTATTCCGGGGGGCATGCCTGTTCGAGCGTCATTATCACCCCTCAAGCTCAGCTTGGTGTTGAGGCCTGCCGGCGACGGCAGCCTCTAAAATCAGTGGCGGTGCCTTCAGGCTCTAAGCGTAGTAATACTCCTCGCTATAGGGTCCTGACGGCGTCCTGCCAAAACCCCCCATTTTTTCATGATTGACCTCGGATCAGGTAGGGATACCCGCTGAACTTAA
OTU 30	3404	Basidiomycota	Agaricomycotina	Tremellomycetes	Tremellomycetes sbc Incertae sedis	Cystofilobasidiales			Cystofilobasidiales	-	-	-	-		UDB028113	SH1556067.08FU	262.5	81.79	AACGCACCTTGCGCTCCTTGGTATTCCGAGGAGCATGCCTGTTTGAGTGTCATGAAACTCTCAACCTTCAACTTTTTTATTAAGGCTGAAGGCTTGGACTTGAGCGTTGCTGGTTTTTACTAACCGGCTCGCTTGAAATGAATTAGCAGATCCTTTTTGTAATCGGTTCCACTCGACGTGATAAGTATTTCGCCGAGGACATACGAAAGTATGGCCGAGATAAAGAAAGTCTTTAGATCCGCTTCTAACTCTTAGATAGAGCTTGCTCTACTAAACCCCATTTTATGATCTGGCCTCAAATCAGGTAGGACTACCCGCTGAACTTAA
OTU 31	3375	Ascomycota							Ascomycota	-	-	-	-		UDB028324		188.7	81.03	AACGCACATTGCGCCCTTCGGTATTCCGTTGGGCATGCCTGTTCGAGCGTCATTTAATCATTCAAGCTCTGCTTGGTGTTGGGTGTTTGTTCCGCCTCAGCGCGTGGACTCGCCTTAAATTCATTGGCAGCCGGTATGTTGGCTTCGTGCGCAGCACATTGCGTCGCGATTCTGGCAGGCCTCCTCCCATTAAGCTTCTTTTAAGTTTGACCTCGGATCAGGTAGGGATACCCGCTGAACTTAA
OTU 32	3213	Ascomycota	Pezizomycotina	Sordariomycetes					Sordariomycetes 1	-	-	-	-		UDB024433	SH1648729.08FU			AACGCACATTGCGCCCGCCAGTATTCTGGCGGGCATGCCTGTTCGAGCGTCATTTCAACCATCAAGCCCCCGGCTTGTGTTGGGGACCTGCGGCTGCCGCAGGCCCTGAAAACCAGTGGCGGGCTCGCTAGTCACTCCGAGCGTAGTAATACATCTCGCTCAGGGCGTGCTGCGGGTTCCGGCCGTTAAAAAGCCTTATTTACCCAAGGTTGACCTCGGATCAGGTAGGAAGACCCGCTGAACTTAA
OTU 33	3184	Ascomycota	Pezizomycotina	Leotiomycetes	Leotiomycetidae	Helotiales			Helotiales 1	-	-	-	-		UDB032140	SH1509644.08FU			AACGCACATTGCGCCCCTTGGTATTCCGAGGGGCATGCCCGTTCGAGCGTCATTATACCCCTCAAGCCTAGCTTGGTGTTGGGGCCTGCTGTTACCGGCAGCCCTTAAAATCAGTGGCGGTGCCATCTGGCTCTAAGCGTAGTAATACTTCTCGCTACAGGGTCCCGGTGGATGCTTGCCATCAACCCCTAATTTTCTATGGTTGACCTCGGATCGGGTAGGGATACCCGCTGAACTTAA
OTU 34	3183	Ascomycota	Pezizomycotina	Leotiomycetes	Leotiomycetidae	Helotiales			Helotiales 1	-	-	-	-		UDB032140	SH1509644.08FU			AACGCACATTGCGCCCCTTGGTATTCCGGGGGGCATGCCTGTTCGAGCGTCATTTAAACCCTCAAGCTCAGCTTGGTGTTGGGGCATGCCTTCAGGCAGCCCCTAAAATTAGTGGCGGTGCCTGCTGGCTCTAAGCGTAGTAATACTCCTCGCTATAGGGTCCGGTGGTCCACCCGCCAAAACCCCCAACTTTCTATGGTTGACCTCGGATCAGGTAGGGATACCCGCTGAACTTAA
OTU 35	3068	Ascomycota	Pezizomycotina	Dothideomycetes	Pleosporomycetidae	Pleosporales			Pleosporales	-	-	-	-		UDB028324		241.9	85.26	AACGCACATTGCGCCCCTTGGTATTCCATGGGGCATGCCTGTTCGAGCGTCATTTGTACCCTCAAGCTCTGCTTGGTGTTGGGTGTTTGTCCACTCCCTGGTGTTTGGACTCGCCTTAAAGCAATTGGCAGCCAGTGTTTTGGTATTGAAGCGCAGCACATTTTGCGATTCTAGCCTGAAATACTAGCATCCAGCAAGTCATTTTCACTTTTGACCTCGGATCAGGTAGGGATACCCGCTGAACTTAA
OTU 36	2987	Ascomycota	Pezizomycotina	Sordariomycetes					Sordariomycetes 1	-	-	-	-		UDB024433	SH1648729.08FU			AACGCACATTGCGCCCGCCAGTATTCTGGCGGGCATGCCTGTTCGAGCGTCATTTCAACCATCAAGCCCCCGGCTTGTGTTGGGGACCTGCGGCTGCCGCAGGCCCTGAAAGACAGTGGCGGTCTCGCTGTAGCACCGAGCGTAGTAACTAAAACCTCGCTAAGGCTGCTCCGCGGGCTCCGGCCGTAAAACCCCCTTCTAACACAAGGTTGACCTCGGATCAGGTAGGAATACCCGCTGAACTTAA
OTU 37	2945	Ascomycota	Pezizomycotina	Dothideomycetes	Pleosporomycetidae	Pleosporales			Pleosporales	-	-	-	-		UDB020918	SH1591179.08FU	221.3	82.89	AACGCACATTGCGCCCTATGGTATTCCGTAGGGCATGCCTGTTCGAGCGTCATTCAAACCTTCAAGCTCTGCTTGGTGTTGGGCGTCTGTCCTGCCTCACGGCGCGGACTCGCCTCAAATCTATTGGCGGCCGGCACGTTGGCTTCGAGCGCAGCAGAAACGCGAACTCGGGCCCGACGGATCGGCTCCCAGAAGCTACCCCCATGAATTTGACCTCGGATCAGGTAGGGATACCCGCTGAACTTAA
OTU 38	2925	Ascomycota	Pezizomycotina	Sordariomycetes	Hypocreomycetidae	Hypocreales	Nectriaceae		Nectriaceae	Saprotroph	Undefined Saprotroph	Possible	Microfungus		UDB023676	SH1546343.08FU	300.3	87.91	AACGCACATTGCGCCCGCCAGTATTCTGGCGGGCATGCCTGTTCGAGCGTCATTTCAACCCTCAGGCCCCCAGTGCCTGGCGTTGGGGATCGGCCGACGGCGGTTTTCGAACCTGCCTGGCCGGCCCCGAAATCTAGTGGCGGTCTCGCTGTAGTCCTCCTCTGCGTAGTAGCACAACCTCGCAGTTGGAACGCGGCGGCGACCATGCCGTTAAACACCCCACTTCTGAAAGTTGACCTCGGATCAGGTAGGAATACCCGCTGAACTTAA
OTU 39	2788	Ascomycota	Pezizomycotina	Sordariomycetes	Hypocreomycetidae	Hypocreales			Hypocreales	Saprotroph	Undefined Saprotroph	Possible	Microfungus		UDB023676	SH1546343.08FU	253.9	84.23	AACGCACATTGCGCCCGCCAGCATTCTGGCGGGCATGCCTGTTCGAGCGTCATTTCAACCCTCGCAGCCCATCTGGGCAGCGGTGTTGGGGACCGGCACCACCGGCGAAGCCCTTAGGGACCCAGCCGGCGCCGCCCCCGAAATACAGTGGCGGTCTCGCTGCAGCCTCCCTTGCGTAGTAGCACACCTCGCACCGGAGCGCAGCGCGGCCACGCCGTAAAACCCCCGACTTTCTGAGTTTGACCTCGAATCAGGTAGGAATACCCGCTGAACTTAA
OTU 40	2677	Ascomycota	Pezizomycotina	Leotiomycetes	Leotiomycetidae	Helotiales	Rutstroemiaceae	Rutstroemia	Rutstroemia sp.	Saprotroph	Plant Saprotroph	Probable	Microfungus		UDB034358	SH1556274.08FU	326.0	92.28	AACGCACATTGCGCCCCTTGGTATTCCGGGGGGCATGCCTGTTCGAGCGTCATTTCAACCCTCAAGCTCAGCTTGGTATTGGGCCTCCGCCGGTCACACGGCGGGCCTTAAAGTCAGTGGCGGCGCCGTTGGGTCCTGAACGTAGTAACATACATCTCGTTACAGGGTCCCCGCGTGCTTCTGCCATTAAACCCCCAATTTTCTATGGTTGACCTCGGATCAGGTAGGGATACCCGCTGAACTTAA
OTU 41	2640	Ascomycota	Pezizomycotina	Leotiomycetes	Leotiomycetidae	Helotiales	Helotiales fam Incertae sedis	Skyttea	Skyttea sp.	Pathotroph	Lichen Parasite	Probable	Microfungus		UDB016230	SH1509701.08FU	327.8	92.95	AACGCACATTGCGCCCCCTGGTATTCCGGGGGGCATGCCTGTTCGAGCGTCATTACAACCCTCAAGCTCTGCTTGGTATTGGGCTCTGCCGGTCCCGGCAGGCCTTAAAATCAGTGGCGGTGCCATTCGGCTTCAAGCGTAGTAATTCTTCTCGCTTTGGAGACCCGGGTGCGTGCTTGCCAGCAACCCCCAATTTTTTCAGGTTGACCTCGGATCAGGTAGGGATACCCGCTGAACTTAA
OTU 42	2632	Ascomycota							Ascomycota	-	-	-	-		UDB031063	SH1523025.08FU	130.3	76.59	AACGCACATTGCGCCCCCTGGTATTCCGGGGGGCACACCTGTTCGAGCGCCATTTCTACCCTAGAGCCCTGCTCTGTGATGGGCCCCGTCCTCGCGGACAGGCCCGAAACCCGTGGGCGCCGTCGTCCGGCCCTGAGCGTAGCAAGAGAAATCCCTCGCTCGGAGTGTCTGTCGGTGGCCGCCTCGAAACCTATTTTTACAAGGTTGGCCTCGGATCAGGTGGGGATACCCGCTGAACTTAA
OTU 43	2588	Ascomycota	Pezizomycotina	Dothideomycetes	Pleosporomycetidae	Pleosporales			Pleosporales	-	-	-	-		UDB028324		217.9	83.14	AACGCACATTGCGCCCCTTGGTATTCCATGGGGCATGCCTGTTCGAGCGTCATTTGTACCCTCAAGCTCAGTCTTGGTGTTGGGTGTTTGTCCTGCCCTCGCGGCGGACTCGCCTTAAAGTGATTGGCAGCCGGAATAATTCTGGGGAACGCAGCACAACTGCAGCCTCTAGTCTTATACGCCGAGCGTCCAACAAGCCTTTTATTCTTGCGTTTGACCTCGGATCAGGTAGGGATACCCGCTGAACTTAA
OTU 44	2569	Ascomycota	Pezizomycotina	Pezizomycetes	Pezizomycetidae	Pezizales	Pyronemataceae	Geopora	Geopora sp.	Symbiotroph	Ectomycorrhizal	Highly Probable	NULL	Short-distance b	UDB011013	SH1637466.08FU	327.8	90.84	AACGCACATTGCGCCTCCTGGTAGTCCGTGAGGCATGCCTGTTCGAGCGTCACTAAAATCAACTCAACCACTTTTGTGTTTGGTCATGGAGGAAGAGTCCGTCTTGTTGTGGTCTCCCCTCCCAAAATCAACGGCGGAAGGTTGCTGGTACTCGGCGTAGTAGTATTATTCGCCCATTATCCAGTGTTGTTCCTGCCACCAAATACCCACAATTCTCTTGATTGACCTCGGATCAGGTAGGGATACCCGCTGAACTTAA
OTU 45	2551	Basidiomycota	Agaricomycotina	Agaricomycetes	Agaricomycetes sbc Incertae sedis	Cantharellales	Clavulinaceae	Clavulina	Clavulina sp. 1	Symbiotroph	Ectomycorrhizal	Highly Probable	Clavarioid	Putative short-distance c	UDB034196	SH1546098.08FU			AACGCACCTTGCACTCCTTGGTATTCCGAGGAGTACGCCTGTTCGAGTGTTATGAAGCTCTCAAAACGCAATTGGCTTAAAACCTGATTGTTGTTTTGGATTTGAACTTTGCCGTGTTATAACGGCTGGTTTTAAAAGTATTAGCTGGTACTAGAACGAATTGGTTCTACTCAACGTGATAATTATCTGATCGTTGAGGACATTCCTTTCACGAGGAATGGCCATAGTAAATTCAATGGACTGCTTCTAATCTGGCTTTAATTCTTTATTGGATTAACCACTTTTCAAATCTGACCTCGAATCAGGTGGGACTACCCGCTGAACTTAA
OTU 46	2532	Ascomycota	Pezizomycotina	Sordariomycetes	Hypocreomycetidae	Hypocreales	Cordycipitaceae	Torrubiella	Torrubiella sp. 1	Pathotroph	Animal Pathogen	Probable	NULL		UDB033201	SH1557178.08FU			AACGCACATTGCGCCCCCTGGTATTCCGGGGGGCATGCCTGTCCGAGCGTCATTACAACCCTCAAGCTCAGCTTGGTATTGGGCCCCGCCGACCCGGCGGGCCCTAAAGTCAGTGGCGGTGCCGTCCGGCTCCGAGCGTAGTAATTCTTCTCGCTCTGGAGGTCCGGTCGTGTGCTCGCCAGCAACCCCCAATTTTTTCAGGTTGACCTCGGATCAGGTAGGGATACCCGCTGAACTTAA
OTU 47	2479	Ascomycota	Pezizomycotina	Leotiomycetes	Leotiomycetidae	Helotiales			Helotiales 1	-	-	-	-		UDB032140	SH1509644.08FU			AACGCACATTGCGCCCCTTGGTATTCCGGGGGGCATGCCTGTTCGAGCGTCATTATAACCCTCAAGCCTAGCTTGGTGTTGGAGCCTGTCTCTGGACAGCTCTTAAAATCAGTGGCGGTGCCTTCTGGTTCTAAGCGTAGTAACTTTTCTCGCTATAGAGTCCTGGAGGTGTTAGCCAGAACCCCTAATTTTCTATGGTTGACCTCGGATCAGGTAGGGATACCCGCTGAACTTAA
OTU 48	2440	Ascomycota	Pezizomycotina	Dothideomycetes	Pleosporomycetidae	Pleosporales			Pleosporales	-	-	-	-		UDB025129	SH1635394.08FU	216.2	82.69	AACGCACATTGCGCCCTTTGGTATTCCAAAGGGCATGCCTGTTCGAGCGTCATTTGTACCCTCAAGCTTTGCTTGGTGTTGGGCGTTTTTGTCTCTGGTCCGCCAGCGACTCGCCTTAAAATCATTGGCAGCCGGCCTACTGGTTTCGGAGCGCAGCACAAATTTGCGCTTCTTCCAGCAGCGGTCCGCGTCCATGAAGCCACTTTTTCAACGTTTGACCTCGGATCAGGTAGGGATACCCGCTGAACTTAA
OTU 49	2418	Ascomycota	Pezizomycotina	Leotiomycetes	Leotiomycetidae	Helotiales	Helotiaceae	Bisporella	Bisporella citrina	Saprotroph	Wood Saprotroph	Probable	Microfungus		UDB019757	SH1522953.08FU	381.0	97.11	AACGCACATTGCGCCCCTTGGTATTCCGGGGGGCATGCCTGTTCGAGCGTCATTTCAACCCTCAAGCTCTGCTTGGTCTTGGGCCGCGCCGGCAACGGCGGGCCTCAAAAACAGTGGCGGCGCCATCGTGTCCCTCAGCGTAGTAATTCTTCTCGCTGTTGGGCCCCGGTGGCTGCTTGCCAGCAACCCCCAATTTTTCTATGGTTGACCTCGGATCAGGTAGGGATACCCGCTGAACTTAA
OTU 50	2368	Basidiomycota	Agaricomycotina	Agaricomycetes	Agaricomycetidae	Agaricales	Tricholomataceae	Mycena	Mycena olivaceomarginata 1	Pathotroph-Saprotroph	Leaf Saprotroph-Plant Pathogen-Undefined Saprotroph-Wood Saprotroph	Probable	Agaricoid		UDB022044	SH1542288.08FU			AACGCACCTTGCGCCCTTTGGTATTCCGAAGGGCATGCCTGTTTGAGTGTCATTAAATTATCAACCTTGCTCGCTTTTACCGGCTTGAGTTAGGCTTGGATGTGAGGGTCTTTGCTGGCTTCCTTCAGTGGATGGTCTGCTCCCTTTAAATGCATTAGTGGGATCTCTTGTGGACCGTCACTTGGTGTGATAATTATCTATGCCATCTTGACTTTGAAGCAAACTAATGGGAACCTGCTTATAACCGTCCTTTCAGGACAACTCTTGACATTTTGACCTCAAATCAGGTAGGACTACCCGCTGAACTTAA
OTU 51	2366	Basidiomycota	Agaricomycotina	Tremellomycetes	Tremellomycetes sbc Incertae sedis	Cystofilobasidiales	Mrakiaceae		Mrakiaceae	-	-	-	-		UDB028113	SH1556067.08FU	204.1	85.85	AACGCACCTTGCGCTCCTTGGTATTCCGAGGAGCATGCCTGTTTGAGTGTCATGAAACTCTCACCCTCTAGCTTTCTTAATCGTGGCTAGCGGCGTGGACGTGAGCGCTGCTGCTTTGTTGCGGCTCGCTCGAAATGTATTAGCAGACCCTTTTCGTAATCGGTTCCACTCAACGTGATAAGTATTTCGTTGAGGACAGTTGCAGCAATGCGGCTGGCCGGGATAAGAAAGGCATAGTTGTCAGCTTCTAATCGCCCTCGGGCAATTTTTTATGATCTGGCCTCAAATCAGGTAGGACTACCCGCTGAACTTAA
OTU 52	2348	Ascomycota	Pezizomycotina	Sordariomycetes	Hypocreomycetidae	Hypocreales	Bionectriaceae		Bionectriaceae	Saprotroph	Undefined Saprotroph	Possible	Microfungus		UDB035651	SH1513375.08FU	298.6	87.41	AACGCACATTGCGCCCGCCAGTACTCTGGCGGGCATGCCTGTCTGAGCGTCATTTCAACCCTCGCCCCCGGCTTCTGTCGGGGACGGTGTTGGGGATCGGCCTCCCGTCTTCCGGGTGGCCGGCCCCTAAATTGAGTGGCGACCACGCCGTAACCTCCTCTGCGTAGTAGTTAAACACTCGCGGGCGGAGAGCGGTGCGGCCTGCCGTAAAACCCCCAACTCTTCTAAGGTTGACCTCAGATCAGGTAGGAATACCCGCTGAACTTAA
OTU 53	2333	Ascomycota	Pezizomycotina	Leotiomycetes	Leotiomycetidae	Helotiales			Helotiales	-	-	-	-		UDB031211	SH1543151.08FU	302.0	90.87	AACGCACATTGCGCCCCTTGGTATTCCGAGGGGCATGCCTGTTCGAGCGTCATTATAACCAATCCAGCCTGGCTGGGTCTTGGGCTCCGCCATCCGGCGGGCCTTAAAATCAGTGGCGGTGCTGCCAGGCTCTAAGCGTAGTAAATACCTCGCTATAGGGTCCTGGTGGAGGCTTGCCAACAACCCCCAACTTCTTAGGTTGACCTCGGATCAGGTAGGGATACCCGCTGAACTTAA
OTU 54	2255	Ascomycota	Pezizomycotina	Pezizomycetes	Pezizomycetidae	Pezizales	Pezizaceae	Peziza	Peziza sp.	Saprotroph-Symbiotroph	Dung Saprotroph-Ectomycorrhizal-Litter Saprotroph-Undefined Saprotroph	Possible	Pezizoid		UDB031863	SH1510510.08FU	406.7	94.96	AACGCACATTGCGCCCTATGGTATTCCGTAGGGCATGCCTGTCTGAGCGTCAGCTCCCACCCACTCAAGTATCTTTTTTGCAGGATTCTTGGAATAATTTGGAGAGGTATCTTGTCACAGAGATGTCCTCCAGAAATCTATAGGCAGTATGGTTTGTATCTGAACCAGACGTAATAATAATAAAATCGTTTGTTTGGGAATAATTGTGCTTGCCTTAACCCACCCATTTTTTTTATTTGGGTGACCTCAGATCAGGTAGGGATACCCGCTGAACTTAA
OTU 55	2228	Ascomycota	Pezizomycotina	Leotiomycetes	Leotiomycetidae	Helotiales	Helotiaceae	Crocicreas	Crocicreas furvum 1	Saprotroph	Undefined Saprotroph	Probable	Pezizoid		UDB003014	SH1573385.08FU			AACGCACATTGCGCCCCGTGGTATTCCGCGGGGCATGCCTGTTCGAGCGTCATTTAAACCAATCCAGCTTGGCTGGGTCTTGGGCTCTCGCCTCTGGGCGGGCCTTAAAATCAGTGGCGGTGCCACCCGGCTCTAAGCGTAGTAATACTCCTCGCTACAGGGCTCCGGGTGGAGGCTGGCCAACAACCCCCCATTTTATCAGGTTGACCTCGGATCAGGTAGGGATACCCGCTGAACTTAA
OTU 56	2225	Basidiomycota	Agaricomycotina	Agaricomycetes	Agaricomycetidae	Boletales	Boletaceae	Strobilomyces	Strobilomyces strobilaceus 1	Symbiotroph	Ectomycorrhizal	Highly Probable	Boletoid	Long-distance d	UDB011964	SH1556757.08FU			AACGCATATTGCGCTCTCTGGTACTCCGGAGAGCATGCCTGTTTGAGGGTAATTAATTAAATCTTTGACCTTTTTTGGTCAAGGGATATGGGCACTCCGTGTTTAACATGGTCGCCTAAAATGTATGGTTGGTCTCATCAAGTTGAGATGTGTAATAATATTTATTTCGCAAACCATTTGATAAGCTACCAAGTTTTGATCTATCCAACTCTGTTAGATGTGGTCAAAACAAATATTTTTGACATTACCTCAAATCAGGTAGGAATACCCGCTGAACTTAA
OTU 57	2198	Basidiomycota	Agaricomycotina	Agaricomycetes	Agaricomycetidae	Agaricales	Tricholomataceae	Calyptella	Calyptella cernua	Saprotroph	Undefined Saprotroph	Probable	NULL		UDB037654	SH1641242.08FU	501.1	100.0	AACGCACCTTGCACTCTTTGGTATTCCGAAGAGTATGCTTGTTTGAGTATCATTAAATTCTCAAACCACTACTTGGTTTTATATCAAGTCAGTGGCTTTGGATGTGGAGGTTGCAGGCTTCTTGTAAAGTCTGCTCTTCTTAAAAGCATTAGTGGTTATTGATTCCACTTCTTGGTGTGATAATATCTACGCCTTGTAAGAACGGATCTAATGTAGCTGCTCTCAAACCGTCTTTATTGACAATTTGAACCATTTGATCTCAAATCAAGTAGGACTACCCGCTGAACTTAA
OTU 58	2127	Ascomycota	Pezizomycotina	Sordariomycetes	Hypocreomycetidae	Hypocreales	Nectriaceae	Fusarium	Fusarium sp.	Pathotroph-Saprotroph-Symbiotroph	Animal Pathogen-Endophyte-Lichen Parasite-Plant Pathogen-Soil Saprotroph-Wood Saprotroph	Possible	Microfungus		UDB035713	SH1610165.08FU	329.5	92.65	AACGCACATTGCGCCCGCCAGTATTCTGGCGGGCATGCCTGTTCGAGCGTCATTTCAACCCTCAAGCACAGCTTGGTGTTGGGACTCGCGTTAATTCGCGTTCCTCAAATTGATTGGCGGTCACGTCGAGCTTCCATAGCGTAGTAGTAAAACCCTCGTTACTGGTAATCGTCGCGGCCACGCCGTTAAACCCCAACTTCTGAATGTTGACCTCGGATCAGGTAGGAATACCCGCTGAACTTAA
OTU 59	2076	Ascomycota	Pezizomycotina	Dothideomycetes	Pleosporomycetidae	Pleosporales			Pleosporales	-	-	-	-		UDB028324		214.4	83.0	AACGCACATTGCGCCCCTTGGTATTCCAGGGGGCATGCCTGTTCGAGCGTCATTTGTACCCTCAAGCTATGCTTGGTGTTGGGTGATTGTCTGGCCTTTGTGCCTAGACTCGCCTCAAAGTAATTGGCAGCCAATGTTGAAGTAGGAGCACGCAGCACATTTTGCGAGCGAGTACCCAAACTACGGCGTCCATAAGCACTTCTCACTTTTGACCTCGGATCAGGTAGGGATACCCGCTGAACTTAA
OTU 60	1998	Ascomycota	Pezizomycotina	Dothideomycetes	Pleosporomycetidae	Pleosporales			Pleosporales	-	-	-	-		UDB020918	SH1591179.08FU	219.6	82.82	AACGCACATTGCGCCCTTCGGTTATTCCTTAGGGCATGCCTGTTCGAGCGTCATTTCAACCTTCAAGCCCCGCTTGGTGTTGGGCGCTGTCCCGCCTCCGCGCGAGGACTCGCCCCAAATGAATTGGCAGCCGCACCCCGAAAGCCGCGAGCGCAGCAAAGACGCGCGAGCAGACCGCAGGGGATGGGCGCTCCACAAGACACAACCACAAGTCTTGACCTCGGATCAGGTAGGGATACCCGCTGAACTTAA
OTU 61	1955	Ascomycota							Ascomycota	-	-	-	-		UDB025129	SH1635394.08FU	197.3	81.4	AACGCACATTGCGCCCTTTGGTATTCCAAAGGGCATGCCTGTTCGAGCGTCATTTGTACCCTCAAGCTTTGCTTGGTGTTGGGCGTCTTTTGTCTCCAGCTCGCTGGAGACTCGCCTTAAAGTCATTGGCAGCCGGCCTACTGGTTTCGGAGCGCAGCACAAGTCGCGCTCTTGCCCAGCCAAGGTCAGCGTCCAGCAAGCCTTTTTTCAACCTTTGACCTCGGATCAGGTAGGGATACCCGCTGAACTTAA
OTU 62	1874	Ascomycota	Pezizomycotina	Dothideomycetes	Pleosporomycetidae	Pleosporales			Pleosporales	-	-	-	-		UDB028324		216.2	82.88	AACGCACATTGCGCCCTTTGGTATTCCAAAGGGCATGCCTGTTCGAGCGTCATTTGTACCCTCAAGCTTTGCTTGGTGTTGGGCGTCTTGTCTCTAGCTTTGCTGGAGACTCGCCTTAAAGTAATTGGCAGCCGGCCTACTGGTTTCGGAGCGCAGCACAAGTCGCACTCTCTATCAGCAAAGGTCTAGCATCCATTAAGCCTTTTTTCAACTTTTGACCTCGGATCAGGTAGGGATACCCGCTGAACTTAA
OTU 63	1872	Ascomycota	Pezizomycotina	Leotiomycetes	Leotiomycetidae	Helotiales	Helotiaceae	Crocicreas	Crocicreas furvum 1	Saprotroph	Undefined Saprotroph	Probable	Pezizoid		UDB003014	SH1573385.08FU			AACGCACATTGCGCCCCGTGGTATTCCGCGGGGCATGCCTGTTCGAGCGTCATTATGACCAATCCCGCTCGCGGGGTCTTGGGCACCGCCTCTGGGCGGGCCTCAAAATCAGTGGCGGTACGGCCGGGCTCTGAGCGTAGTAAATCTTCTCGCTACAGGGTCCCGGGCGGCACTGGCCAGCAACCCCCAATCTTTTACAGGTTGACCTCGGATCAGGTAGGGATACCCGCTGAACTTAA
OTU 64	1795	Ascomycota							Ascomycota	-	-	-	-		UDB023669	SH1522847.08FU	178.4	79.92	AACGCACATTGCGCCCGCCAGCATTCTGGCGGGCATGCCTGTTCGAGCGTCATTTCAACCCTCAAGCTCTGCTTGGTGTTGGGGCCCTACGGTTAAACGTAGGCCCTTAAAGGTAGTGGCGGACCCTCTCGGAGCCTCCTTTGCGTAGTAACTAACGTCTCGCACTGGGATTCGGAGGGATTCTAGCCGTAAAACCCCCAATTTTTTAAGGTTGACCTCGGATCAGGTAGGAATACCCGCTGAACTTAA
OTU 65	1783	Basidiomycota	Agaricomycotina	Agaricomycetes	Agaricomycetes sbc Incertae sedis	Hymenochaetales	Schizoporaceae	Hyphodontia	Hyphodontia arguta 1	Saprotroph	Undefined Saprotroph	Probable	Corticioid		UDB032327	SH1611467.08FU			AACGCACCTTGCGCTCCTGGACTTGTTTCAGGAGCATGCCTGTTTGAGTGTCATGAAATCATCAACCACGATGCCTTTGTGTGTCCCGTGGCTTGGACTTGGGGATCTGCTGGCGAAAGTCGGCTTCCCTTGAATGCATTAGTCGGGCGCTCTCGCTCCGAGAAGTGTGATAAACTATCATTCACTGATCGGCGAGGGGCTATGTCCGGGCTTCCAACCGCATGAATGCATGCACTTTGACATATCTGACCTCAAATCAGGTAGGACTACCCGCTGAACTTAA
OTU 66	1774	Ascomycota	Pezizomycotina	Sordariomycetes	Hypocreomycetidae	Hypocreales	Hypocreaceae	Trichoderma	Trichoderma sp.	Saprotroph	Undefined Saprotroph	Possible	Microfungus		UDB028149	SH1567966.08FU	454.8	99.26	AACGCACATTGCGCCCGCCAGTATTCTGGCGGGCATGCCTGTCCGAGCGTCATTTCAACCCTCGAACCCCTCCGGGGGTCCGGCGTTGGGGATCGGGAACCCCTAAGACGGGATCCCGGCCCCGAAATACAGTGGCGGTCTCGCCGCAGCCTCTCATGCGCAGTAGTTTGCACAACTCGCACCGGGAGCGCGGCGCGTCCACGTCCGTAAAACACCCAACTTCTGAAATGTTGACCTCGGATCAGGTAGGAATACCCGCTGAACTTAA
OTU 67	1690	Ascomycota	Pezizomycotina	Sordariomycetes	Hypocreomycetidae	Hypocreales	Bionectriaceae	Nectriopsis	Nectriopsis lecanodes 1	Pathotroph	Fungal Parasite-Protistan Parasite	Probable	Microfungus		UDB035652	SH1513383.08FU			AACGCACATTGCGCCCGCCAGTATTCTGGCGGGCATGCCTGTCTGAGCGTCGTTTCGACCCTCGCGCCCGGCTTCTGTCGGGGGCGGTGTTGGGGATCGGCCACACCCTTCAGTGGGAGGCCGGCCCCTAAATTCAGTGGCGACCACGCTGTAGCCTCCCCTGCGTAGTACTAAAACCACCTCGCAGGCGGAGAGCGGTGCGGCCCGCCGTAAAACCCCCCAACTTTTACAAGGTCGACCTCAGATCAGGTAGGAATACCCGCTGAACTTAA
OTU 68	1682	Mortierellomycota	Mortierellomycotina	Mortierellomycetes	Mortierellomycetes	Mortierellales	Mortierellaceae	Mortierella	Mortierella sp.	Saprotroph-Symbiotroph	Endophyte-Litter Saprotroph-Soil Saprotroph-Undefined Saprotroph	Possible	Microfungus		UDB028005	SH1557019.08FU	508.0	94.84	AACGCATATTGCGCTCTTTGGTATTCCGAAGAGCATGCTTGTTTGAGTATCAGTAAACACCTCAAAGCCTTTTTTCTTTTTTGAAGAAAGGCTTTGGACTTGAGCAATCCCAACACCAATCTTTTAAAGAGAGGGGGCGGGTTGCTTGAAATGCAGGTGCAGCTGGACATTCTCCTGAGCTAAAAGCATATTCATTTAGTCCCGTCAAACGGATTATTACTTTTGCTGCAGCTAATATAAAGGGAGTTTGACCATTTTGGCTGACTGATGCAGGATTTTCACAAGAGTCTTCAAAACCTCTTGTTAAACTCGATCTCAAATCAAGTAAGACTACCCGCTGAACTTAA
OTU 69	1670	Basidiomycota	Agaricomycotina		Agaricomycetidae	Agaricales	Hymenogasteraceae	Hymenogaster	Hymenogaster sp.	Symbiotroph	Ectomycorrhizal	Possible	Gasteroid	Putative short-distance e	UDB032988	SH1563791.08FU	475.4	96.44	AACGCACCTTGCGCTCCTTGGTATTCCGAGGAGCATGCCTGTTTGAGTGTCATTTAATTCTCAACCTTATTAGCTTTTGCTGATAATGGCTTGGATGTGGGGGTTCTCTTTTGCTGGCTTCTAGGTCGGCTCCCCTGAAATCCATTAGCTGGTGCCCCGCGTGGACTGTCTATTTGGTGTGATAATTATCAACGCCGTGGATGTCTGCAATTGGTTTTGGCACTGCTTCTAACTGTCTGTTCATTTGGACAATACATGACAATTTGACCTCAAATCAGGTAGGACTACCCGCTGAACTTAA
OTU 70	1660	Basidiomycota							Basidiomycota	-	-	-	-		UDB019411	SH1517361.08FU	178.4	78.8	AACGCACCTTGCGCCTTTTGGTATTCTGAAAGGCATGCCTGTTTGAGTGTCATGAAATCCTCAATCCCCCTCGGGTTTCTGATCCGGGGTGGACTTGGACTTGGGTGTCTGCCGTTCCGACGGCTTGCCTCAAATGACTTAGTGGGACCAGCATCCACGGTTAGACGTAATAAGTTTCGTCTGGCTAGCGTGACGGCCTGCTCACAACCCCCTCGCTTTGGCGTTGACATTTTTTTTTTTGACTCTGACCTCAAATCAGGTAGGGCTACCCGCTGAACTTAA
OTU 71	1623	Mucoromycota	Mucoromycotina	Mucoromycetes	Mucoromycetes	Mucorales	Mucoraceae	Mucor	Mucor sp.	Saprotroph	Undefined Saprotroph	Probable	NULL		UDB035691	SH1584792.08FU	396.4	94.85	AACGCAACTTGCGCTCAATGGTATTCCATTGAGCACGCCTGTTTCAGTATCAAAAACACCCCACATTCATAATTTTGTTGTGAATGGAAATGAGAGTTTCGGCTTTATTGCTGAATTCTTTAAAATTATTAGGCCTGAACTATTGTTCTTTCTGCCTGAACATTTTTTTAATATAAAGGAATGCTCTAGTAAAAAGACTATCTCTGGGGCCTCCCAAATAAATCATTCTTAAATTTGATCTGAAATCAGGCGGGATTACCCGCTGAACTTAA
OTU 72	1606	Basidiomycota	Agaricomycotina	Tremellomycetes		Trichosporonales			Trichosporonales	-	-	-	-		UDB027341	SH1514262.08FU	223.0	83.14	AACGCACCTTGCGCCCTCTGGTATTCCGGAGGGCATGCCTGTTTGAGTGTCATGTAGACTCAATCCCTCGGGTTTCCGAGGAGATTGGACTTGGGTGTTGCCGCTCTGCCGGCTCGCCTTAAAAGACTTAGCGGGATAGCACCGTAGTCGGCGTAATAAGTTTCGTCGGTGAAGGTTGTGATGACTGCTTACAATCGCCCTCGGGCAATTTTTGACTCTGACCTCAAATCAGGTAGGACTACCCGCTGAACTTAA
OTU 73	1545	Basidiomycota	Agaricomycotina	Agaricomycetes	Agaricomycetes sbc Incertae sedis	Cantharellales	Ceratobasidiaceae	Ceratobasidium	Ceratobasidium sp.	Pathotroph-Saprotroph-Symbiotroph	Endomycorrhizal-Plant Pathogen-Undefined Saprotroph	Possible	Microfungus		UDB017026	SH1554510.08FU	449.6	94.29	AACGCACCTTGCGCTCCTTGGTATTCCTCGGAGCATGCCTGTTTGAGTATCATGAAATTCTCAAAATAAATCTTTTGTTCATTCAATTGGTTTCATTTTGGACTTGGAGGTCTGCAGATTCACGTCTGCTCCTCTTAAATTCATTAGCTGGATCTCTATAGACTTGGTTCCACTCGGCGTGATAAGTATCACTCGCTGAGGACACTGTAAAAGGTGGCCAGGATTGTGGAAGAACTGCTTCTAATAGTCCATTCACTTGGACAATATACTTTATGATCTGATCTCAAATCAGGTAGGACTACCCGCTGAACTTAA
OTU 74	1540	Ascomycota	Pezizomycotina	Leotiomycetes	Leotiomycetidae	Helotiales	Dermateaceae	Pyrenopeziza	Pyrenopeziza benesuada 1	Pathotroph	Plant Pathogen	Probable	NULL		UDB003038	SH1524866.08FU			AACGCACATTGCGCCCTGTGGTATTCCGCAGGGCATGCCTGTTCGAGCGTCATTACAACCACTCAAGCCTGGCTTGGTATTGGGGTTTGCGGTTCCGCAGCCCCTAAAACTAGTGGCGGTGCCGGTGTGGCTCTACGCGTAGTAATTCTTCTCGCGATGGAGTTCCCCTGGATACCTGCCAGAACCCCCCAATTTTTACAGGTTGACCTCGGATCAGGTAGGGATACCCGCTGAACTTAA
OTU 75	1520	Mortierellomycota	Mortierellomycotina	Mortierellomycetes	Mortierellomycetes	Mortierellales			Mortierellales	-	-	-	-		UDB028005	SH1557019.08FU	300.3	82.78	AACGCATATTGCGCTCTCTGGTATTCCGGAGAGCATGCTTGTTTGAGTATCAGTAAACACCTCAACTCCCTTTTTTTCTTTTTTGAAATGAGGGAGCTGGACTTGAGTGATCCCAACACTTTTCTTCACTGAAAAGTGGCGGGTCACTTGAAATGCAGGTGCAGCTGGACTTTTCTCTGAGCTATAAGCATATCTATTTAGTCTGCCTAAAAAACAGATTATTACCTTTGCTGCAGCTAACATAAAGGAGATGAGTTCTTGTGCTGACTGATGCAGGATTCACAGAGACAGCTTCGCGGCTGACTTTGTAAACTCGATCTCAAATCAAGTAAGACTACCCGCTGAACTTAA
OTU 76	1462	Ascomycota							Ascomycota	-	-	-	-		UDB024266	SH1513388.08FU	188.7	79.78	AACGCACATTGCGCCCGCTAGTATTCTGGCGGGCATGCCTGTCTGAGCGTCATTTCACCAATCCCCCTGGGCTTCTTGTCCCGGGGGCTGTTGGGGATCGCCGAGCGTACACTCGGCGTCCCCTAAACCTAGTGGCAGCCTCGCCGCGGCCTCCCCTGCGTAGTAAACACTCTCGCAGGCGGAACCACAGCGAAGGGTCGCCGTAAAACCCCCAACTTCTTAATGGTTGACCTCAGATCAGGTAGGAATACCCGCTGAACTTAA
OTU 77	1458	Basidiomycota	Agaricomycotina	Agaricomycetes	Agaricomycetidae	Agaricales	Stephanosporaceae		Stephanosporaceae	Saprotroph	Plant Saprotroph-Wood Saprotroph	Probable	Corticioid-Gasteroid		UDB025507	SH1555388.08FU	355.2	89.4	AACGCACCTTGCGCCTTGTGGTATTCCACAAGGCATGCCCGTTTGAGTGTCATTAAATCATCAACCTCAAAACCTTTGTGTTTCTGAGGCTTGGTCTTGAGGGTTTTGCAGGCCATCCCCGGTCTGCTCCCTTTAAATCTATTAGCGAGACTTCCCTGTGCTGACCGTCTCTTGGCGTGATAATTATCTGCGTCAAACTTGGCGGTTCTCGTTGGGCTTGCTTCTAATCGTCCTCGGACAATCGGATTCGGGCGCATATATGCACCTGTTTTCCAAAACCTTTTGACCTCAAATCGGGTAGGACTACCCGCTGAACTTAA
OTU 78	1442	Basidiomycota	Agaricomycotina	Agaricomycetes	Agaricomycetes sbc Incertae sedis	Cantharellales	Ceratobasidiaceae	Ceratobasidium	Ceratobasidium sp.	Pathotroph-Saprotroph-Symbiotroph	Endomycorrhizal-Plant Pathogen-Undefined Saprotroph	Possible	Microfungus		UDB017026	SH1554510.08FU	439.3	93.65	AACGCACCTTGCGCTCCTTGGTATTCCTCGGAGCATGCCTGTTTGAGTATCATGAAATCCTCAAAATAAATCTTTTGTTCATTCGATTGATTTTATTTTGGACTTGGAGGTCTGCAGATTCACGTCTGCTCCTCTTAAATTCATTAGCTGGATCTGTATGAACTCGGTTCCACTCGGCGTGATAAGTATCACTCGCTGAGGACACTGTAAAAGGTGGCCGGGATTATTATGAACCGCTTCTAATAGTCCATTGACTTGGACAAATTACTTATGATCTGATCTCAAATCAGGTAGGACTACCCGCTGAACTTAA
OTU 79	1432	Ascomycota	Pezizomycotina	Sordariomycetes					Sordariomycetes 1	-	-	-	-		UDB024433	SH1648729.08FU			AACGCACATTGCGCCCGCCAGTATTCTGGCGGGCATGCCTGTTCGAGCGTCATTTCAACCATCAAGCCCCAGGCTTGTGTTGGGGACCTGCGGCTGCCGCAGGCCCTGAAAACCAGTGGCGGGCTCGCTGTCACACCGGGCGTAGTAGATTTTATCTCGCTCAGGGCGTGCTGCGGGTTCCGGCCGTTAAAAAGCCTTTTTTACCCAAGGTTGACCTCGGATCAGGTAGGAATACCCGCTGAACTTAA
OTU 80	1419	Ascomycota	Pezizomycotina	Sordariomycetes					Sordariomycetes 1	-	-	-	-		UDB024433	SH1648729.08FU			AACGCACATTGCGCCCGCCAGTACTCTGGCGGGCATGCCTGTTCGAGCGTCATTTCAACCCTCAAGCCCTGCTTGGTGTTGGGGTCCTACGGCTGCCGTAGGCCCTGAAAGGAAGTGGCGGGCTCGCTACAACTCCGAGCGTAGTAGAATCCTATCTCGCTAGGGAGGTGCGGCGTGCTCCTGCCGTTAAAGACCCCATCTTTAACCAAGGTTGACCTCGGATCAGGTAGGAATACCCGCTGAACTTAA
OTU 81	1411	Ascomycota	Pezizomycotina	Dothideomycetes	Pleosporomycetidae	Pleosporales			Pleosporales	-	-	-	-		UDB025129	SH1635394.08FU	233.3	84.31	AACGCACATTGCGCCCCTTGGTATTCCATGGGGCATGCCTGTTCGAGCGTCATTTGTACTCTCAAGCCTTGCTTGGTGTTGGGTGTTTGTCTCTGCCTTGCTTAGACTCGCCTTAAATATATTGGCAGCCGGTACACTGGTTTGAAGCGCAGCACAATTGCATTTCAGGCTCTTAGTATTAGCATCCACAAAGATTATTAACACTTTTGACCTCGGATCAGGTAGGGATACCCGCTGAACTTAA
OTU 82	1393	Ascomycota	Pezizomycotina	Dothideomycetes	Dothideomycetidae	Dothideales	Aureobasidiaceae	Aureobasidium	Aureobasidium pullulans	Pathotroph-Symbiotroph	Animal Pathogen-Endophyte-Epiphyte-Plant Pathogen	Possible	NULL		UDB035654	SH1515060.08FU	429.0	100.0	AACGCACATTGCGCCCCTTGGTATTCCGAGGGGCATGCCTGTTCGAGCGTCATTACACCACTCAAGCTATGCTTGGTATTGGGCGTCGTCCTTAGTTGGGCGCGCCTTAAAGACCTCGGCGAGGCCACTCCGGCTTTAGGCGTAGTAGAATTTATTCGAACGTCTGTCAAAGGAGAGGAACTCTGCCGACTGAAACCTTTATTTTTCTAGGTTGACCTCGGATCAGGTAGGGATACCCGCTGAACTTAA
OTU 83	1388	Ascomycota	Pezizomycotina	Dothideomycetes	Pleosporomycetidae	Pleosporales			Pleosporales	-	-	-	-		UDB028324		204.1	82.21	AACGCACATTGCGCCCCTTGGTATTCCATGGGGCATGCCTGTTCGAGCGTCATTTACACCCTCAAGCTCTGCTTGGTGTTGGGCGTCTGTCCCGCTTCATGCGTGGACTCGCCCCAAAGATATTGGCAGCGGTCTTGCCAGCTTCTCGCGCAGCACTTTGCGTTTCTCGAAGCTTTGGCGGATCGGCGTCCACCAAGTCTATATCACAGTTTGACCTCGGATCAGGTAGGGATACCCGCTGAACTTAA
OTU 84	1362	Ascomycota	Pezizomycotina	Dothideomycetes	Pleosporomycetidae	Pleosporales			Pleosporales	-	-	-	-		UDB028324		245.3	85.38	AACGCACATTGCGCCCCTTGGTATTCCATGGGGCATGCCTGTTCGAGCGTCATTTGTACCCTCCAGCCCTGCTGGGTGTTGGGCGTTTTGTTCCGCTGCACGCGTGAACTCGCCTCAAATGCATTGGCAGCCCGCCGTCCCGTGTGGGAGCGCAGCACATTTTGCGCTCTCCGCTGCTGACGGTGGCATCCACAAGTCTACCATTTTACGCTTGACCTCGGATCAGGTAGGGATACCCGCTGAACTTAA
OTU 85	1353	Ascomycota	Pezizomycotina	Sordariomycetes	Hypocreomycetidae	Hypocreales	Bionectriaceae	Nectriopsis	Nectriopsis lecanodes 1	Pathotroph	Fungal Parasite-Protistan Parasite	Probable	Microfungus		UDB035652	SH1513383.08FU			AACGCACATTGCGCCCGCTAGTATTCTGGCGGGCATGCCTGTCTGAGCGTCATTTCAACCCTCGCGCCCGGCTTCTTGTCGGATGCGGTGTTGGGGATCGACCTGCCGTCTGACGGAGGGTCGGCCCCGAAATGGAGTGGCGACCACGCCGTAGCCTCCTCTGCGTAGTAACATATCACCTCGCAGGCGGAGAGCGGTGCGGTCATGCCGTAAAACACCCAACTTTACCAAGGTTGACCTCAGATCAGGTAGGAATACCCGCTGAACTTAA
OTU 86	1344	Ascomycota	Pezizomycotina	Leotiomycetes	Leotiomycetidae	Helotiales			Helotiales	-	-	-	-		UDB031207	SH1523059.08FU	360.4	95.82	AACGCACATTGCGCCCCCTGGTATTCCGGGGGGCATGCCTGTTCGAGCGTCATTTATACCAATCTAGCCCGGCTAGGTGTTGGGCTTCGCCGTCTGGCGGGCCTTAAAATCAGTGGCGGTGCTTCCAGGCTCTACGCGTAGTAATTTTCTCGCTATAGGGTCCTGGGAGACGCTGGCCAACAACCCCAAATTTTTCTAGGTTGACCTCGGATCAGGTAGGGATACCCGCTGAACTTAA
OTU 87	1308	Ascomycota	Pezizomycotina	Dothideomycetes	Pleosporomycetidae	Pleosporales			Pleosporales	-	-	-	-		UDB025129	SH1635394.08FU	224.7	83.59	AACGCACATTGCGCCCCTTGGTATTCCATGGGGCATGCCTGTTCGAGCGTCATTTGTACTCTCAAGCCTTGCTTGGTGTTGGGTGTTTGTCTTTGCTCTGCCTAGACTCGCCTTAAATATATTGGCAGCCGGTATTTTGGTTTGAAGCGCAGCACATTTGCTTTTCAAATCTTTATTATTGGTACCCATAAGCATTTTAACACTTTTGACCTCGGATCAGGTAGGGATACCCGCTGAACTTAA
OTU 88	1304	Ascomycota	Pezizomycotina	Dothideomycetes	Pleosporomycetidae	Pleosporales			Pleosporales	-	-	-	-		UDB020918	SH1591179.08FU	209.3	82.06	AACGCACATTGCGCCCTTCGGTTATTCCTTAGGGCATGCCTGTTCGAGCGTCATTTCAACCTTCAAGCTCAGCTTGGTGTTGGGTGTTTGTCCCGCCCCCCGCGCGTGGACTCGCCTCAAATTGATTGGCAGCCGCATCCCCCCGCCGCGAGCGCAGCACAGTCGCGCTTACGACGTGGGTGGGTCGGCGATCCAGAAGCCTATTTCAACGTCTTGACCTCGGATCAGGTAGGGATACCCGCTGAACTTAA
OTU 89	1287	Ascomycota	Pezizomycotina	Leotiomycetes	Leotiomycetidae	Helotiales	Leotiaceae	Pezoloma	Pezoloma sp.	Pathotroph-Saprotroph-Symbiotroph	Bryophyte Parasite-Ectomycorrhizal-Ericoid Mycorrhizal-Undefined Saprotroph-Wood Saprotroph	Possible	Microfungus; Dark Septate Microfungus		UDB035012	SH1509609.08FU	332.9	93.36	AACGCACATTGCGCCCCGTGGTATTCCGCGGGGCATGCCTGTTCGAGCGTCATTTCAACCCATCAAGCTTCGGCTTGGATTTGGGGCCTGCGGTCTCGCAGCCCTTAAACTCAGTGGCGGTGCTATTGAGCTCTGAGCGTAGTAATTCTTCTCGCTATAGAGTCTCGGTGGTGGCTTGCCAACAACCCCCAATTTTATCAGGTTGACCTCGGATCAGGTAGGGATACCCGCTGAACTTAA
OTU 90	1272	Ascomycota	Pezizomycotina	Sordariomycetes					Sordariomycetes 1	-	-	-	-		UDB024433	SH1648729.08FU			AACGCACATTGCGCCCGCCAGTATTCTGGCGGGCATGCCTGTTCGAGCGTCATTTCAACCATCAAGCCCCGGGCTTGTGTTGGGGACCTGCGGCTGCCGCAGGCCCTGAAAAGCAGTGGCGGGCTCGCTGTCACACCGAGCGTAGTAGCATACATCTCGCTCTGGGCGTGCTGCGGGTTCCGGCCGTTAAACCACCTTTTAACCCAAGGTTGACCTCGGATCAGGTAGGAAGACCCGCTGAACTTAA
OTU 91	1256	Ascomycota							Ascomycota	-	-	-	-		UDB027689	SH1506867.08FU	181.8	79.78	AACGCACATTGCGCCCGCCAGCATTCTGGCGGGCATGCCTGTTCGAGCGTCATTTCAACCCTCAAGCCCAGCTTGGTGTTGGGGCCCTACGGTCGACGTAGGCCCTTAAAGGTAGTGGCGGACCCTCCCGGAGCCTCCTTTGCGTAGTAACTTAACGTCTCGCACTGGGATCCGGAGGGACTCTTGCCGTAAAACCCCCAAAACTTTTACAGGTTGACCTCGGATCAGGTAGGAATACCCGCTGAACTTAA
OTU 92	1255	Ascomycota	Pezizomycotina	Pezizomycetes	Pezizomycetidae	Pezizales	Pyronemataceae	Cheilymenia	Cheilymenia sp.	Saprotroph	Dung Saprotroph-Undefined Saprotroph	Highly Probable	Pezizoid		UDB031685	SH1529948.08FU	351.8	93.33	AACGCACATTGCGCCTCCTGGTATTCCGGGAGGCATGCCTGTTCGAGCGTCATTAAAAACCACTCAAGCTCTTTTGCTTGGTATTGGAAGATGAGTATGCTTTGTTATACTCACTTTCGAAATTCAAAGGCGTAGAGCCCCACGTGCCACGGCGTAGTAAGTTTTCTTTCGCTTGGAATGTGAGGTGATATTGCCACAAACCCCCAATTTTTCTAGGTTGACCTCGGATCAGGTAGGGATACCCGCTGAACTTAA
OTU 93	1250	Ascomycota	Pezizomycotina	Sordariomycetes	Xylariomycetidae	Xylariales	Xylariaceae	Xylaria	Xylaria sp. 1	Saprotroph-Symbiotroph	Endophyte-Undefined Saprotroph-Wood Saprotroph	Probable	Xylarioid		UDB033617	SH1552222.08FU			AACGCACATTGCGCCCGCTAGTATTCTGGCGGGCATGCCTGTCCGAGCGTCATTTCAACCCATCAAGCCTAGCGCTTGTGTTGGAGCCCTGCGGCCGCCGCAGCCTCCCAAAAGTAGTGGCGGGCTCGCTATCACGCTGAGTGCAGTAGTATTCTTCTCACTCCTGTTGTGTAGCGGGTAACCAGCCGTAAAATAACTCCCAAAATGTTGACCTCGGATCAGGTAGGAATACCCGCTGAACTTAA
OTU 94	1211	Ascomycota	Pezizomycotina	Sordariomycetes					Sordariomycetes 1	-	-	-	-		UDB024433	SH1648729.08FU			AACGCACATTGCGCCCGCCAGTATTCTGGCGGGCATGCCTGTCCGAGCGTCATTTCAACCCATCAAGCCTAGCGCTTGTGTTGGAGCCCTACGGCCGCCGCAGCCTCCTAAAATTAGTGGCGGGCTCGCTATCACGCTGAGTGCAGTAGTATTCTTCTCACTCCTGTTGTGTAGCGGGTAACCAGCCGTAAAAACCCCCCATATTCAAAGGTTGACCTCGGATCAGGTAGGAATACCCGCTGAACTTAA
OTU 95	1210	Basidiomycota	Agaricomycotina	Agaricomycetes	Agaricomycetidae	Agaricales	Hydnangiaceae	Laccaria	Laccaria tortilis	Symbiotroph	Ectomycorrhizal	Highly Probable	Agaricoid	Medium-distance smooth subtype f	UDB037584	SH1553005.08FU	516.6	100.0	AACGCACCTTGCGCTCCTTGGTATTCCGAGGAGCATGCCTGTTTGAGTGTCATTAAATTCTCAACCTTCCAACTTTTATTAGCTTGGTTAGGCTTGGATGTGGGGGTTGTGGGCTTCATTAATGAGGTCGACTCTCCTTAAATGCATTAGCGGAACTTTTGTGGACCGTCTATTGGTGTGATAATTATCTACGCCGTGGATGTGAAGCAACTTTATGAAGTTCAGCTTCTAACCGTCCATTAATTTGGACAATTTTGAAAATTTGACCTCAAATCAGGTAGGACTACCCGCTGAACTTAA
OTU 96	1166	Basidiomycota	Agaricomycotina	Tremellomycetes	Tremellomycetes sbc Incertae sedis	Tremellales	Bulleribasidiaceae	Vishniacozyma	Vishniacozyma sp.	Pathotroph-Saprotroph-Symbiotroph	Fungal Parasite-Undefined Saprotroph	Possible	Tremelloid-Yeast		UDB027448	SH1528207.08FU	344.9	94.92	AACGCACCTTGCGCCCTTTGGTATTCCGAAGGGCATGCCTGTTTGAGTGTCATGAAACCTCACTCCACTTGGGTTTTTGCCTGAGTGGTAGTGTATTGGGTGTTGCCTTGCCAAAGGCTCGCCTTAAAAGAATAAGCACCTTGGATGTAATACGTTTCATCCTTTCGGGTGGCTAATAACCCCACATAACTCATGATCTGGCCTCAAATCAGGTAGGGCTACCCGCTGAACTTAA
OTU 97	1151	Basidiomycota	Agaricomycotina	Agaricomycetes	Agaricomycetidae	Agaricales	Entolomataceae	Entoloma	Entoloma sericeum	Pathotroph-Saprotroph-Symbiotroph	Ectomycorrhizal-Fungal Parasite-Soil Saprotroph-Undefined Saprotroph	Possible	Agaricoid		UDB017882	SH1569065.08FU	518.3	100.0	AACGCACCTTGCGCTCCTTGGTATTCCGAGGAGCATGCCTGTTTGAGTGTCATGAAATTCTCAACCTCTCTAGTTTTTTGAACTGGTTAGGCTTGGATTTTGGAAGTTGCTGGCTCACTATGAATCAGCTCTTCTTAAATATATTAGCGAAGATCTTTGCTGCTCATCATTGGTATGATAATTATCTATATCATTGATAACCAGTGTCCCTCACGGGAGAGGTCTTGCTTCTAATAGTCTTTTTAAAGACAATCTGATAACTTTTGACCTCAAATCAGGTAGGACTACCCGCTGAACTTAA
OTU 98	1131	Ascomycota							Ascomycota	-	-	-	-		UDB027689	SH1506867.08FU	178.4	79.06	AACGCACATTGCGCCCGCCGGTATTCCGGCGGGCATGCCTGTTCGAGCGTCATTTCACCACTCAAGCCCAGCTTGGTGTTGGGGCACCCGGCCGCCCAGCGGCCCCGGGGCCCCCAAGTCCATCGGCGGGCTCGTCGGGACCCTGAGCGCAGTAACACGCGGTAAAACGCGCCCTCGCTCGGCGGATCCAGTCGGGTTCCAGCCGCTAAACCCCCCTAAACTTCTTAGGTTGACCTCGGATCAGGTAGGAATACCCGCTGAACTTAA
OTU 99	1128	Ascomycota							Ascomycota	-	-	-	-		UDB019759	SH1568211.08FU	192.1	79.65	AACGCACATTGCGCCCGCCAGCACTCTGGCGGGCATGCCTGTTCGAGCGTCATTTCAACCCTCGGAACCCCGCGGCCTCGCGCCACGGGGGGCCGGTGTTGGGGCTCGGGCGCTCCCAGCGAGCCGCCCGTCCCCTAAATCCAGTGGCGGTCCCGCCCTGGCACCCCCGCGTAGTAGCACACCTCGCGGGACGTGCCTGGCTTGACCACGCCGTTAAACCCCCCACATACGCAAGGTTGACCTCGGATCAGGTAGGAATACCCGCTGAACTTAA
OTU 100	1117	Ascomycota	Pezizomycotina	Leotiomycetes	Leotiomycetidae	Helotiales	Dermateaceae		Dermateaceae	Pathotroph-Saprotroph	Plant Pathogen-Plant Saprotroph	Probable	Microfungus		UDB034362	SH1545937.08FU	281.4	89.21	AACGCACATTGCGCCCTTTGGTATTCCGAAGGGCATGCCTGTTCGAGCGTCATTATAACCACTCAAGCCTTTGCTTGGTCTTGGGGCTCCCGATTTCGGGGCTCTTAAAATCAGTGGCGGTGCTTGTTAGCTCTACGCGTAGTAATACTCCTCGCGTCTGAACCTAATAAGTAACTTGCCAGCAACCCCCAATTTTTTACAGGTTGACCTCGGATCAGGTAGGGATACCCGCTGAACTTAA
OTU 101	1103	Ascomycota	Pezizomycotina	Leotiomycetes	Leotiomycetidae	Helotiales	Helotiaceae	Crocicreas	Crocicreas furvum 1	Saprotroph	Undefined Saprotroph	Probable	Pezizoid		UDB003014	SH1573385.08FU			AACGCACATTGCGCCCCGTGGTATTCCGCGGGGCATGCCTGTTCGAGCGTCATTTAAACCAATCCAGCTTGCTGGGTCTTGGGCTTCGCCTCCGGGCGGGCCTTAAAATCAGTGGCGGCGCCTCTCGGCTCTAAGCGTAGTAATACTCCTCGCTACAGAGTCCCGGGTGGATGCTTGCCAACAACCCCCAATTTTATCAGGTTGACCTCGGATCAGGTAGGGATACCCGCTGAACTTAA
OTU 102	1089	Ascomycota	Pezizomycotina	Leotiomycetes	Leotiomycetidae	Helotiales	Hyaloscyphaceae	Calycellina	Calycellina sp.	Saprotroph	Undefined Saprotroph	Probable	NULL		UDB034361	SH1566313.08FU	264.2	92.82	AACGCACATTGCGCCCTCTGGTATTCCGGAGGGCATGCCTGTTCGAGCGTCATAATAACCAAATCACCCTATGGTGGACTTGGAGCTGGCCGTCTGGCCTCTCTCAAAATTAGTGGCGGTGCTCTTAAAGCTCTACGCGTAGTAATTTTTCTCGCTATAGGGTCTTACTAGTACTTGCCAACAACCCCAACTTTAAGGTTGACCTCGGATCAGGTAGGGATACCCGCTGAACTTAA
OTU 103	1089	Ascomycota							Ascomycota	-	-	-	-		UDB035658	SH1513367.08FU	168.1	79.01	AACGCACATTGCGCCCGCCAGTACTCTGGCGGGCATGCCTGTCCGAGCGTCATTTCAACCATCAAGCCCCGTAGCTTGTGTTGGGGACCTGCGGTTGCACGCAGGCCCCGAAATGCAGTGGCGGGCTCGCTGGCACAACCGAGCGTAGTAGCATAAACCTCGCTCAGGGCGTGCCTCGGGTTCTAGCCGTAAAGCCTCCTGGCACTAGGTTGGCCTCGGATCAGGTAGGAAGACCCGCTGAACTTAA
OTU 104	1076	Ascomycota	Pezizomycotina	Sordariomycetes	Hypocreomycetidae	Hypocreales	Ophiocordycipitaceae		Ophiocordycipitaceae	Saprotroph	Undefined Saprotroph	Possible	Microfungus		UDB028275	SH1649293.08FU	259.1	85.19	AACGCACATTGCGCCCGCCGGCACTCCGGCGGGCATGCCTGTCCGAGCGTCATTTCAACCCTCAGGCCCACCCTTCCGGGGGAGCGGGCCTGGTTCTGGGGATCGGCGGCCCTCGCGGCCCCCGTCCCTCAAATTCAGTGGCGGTCGCGCCGCAGCCTCCCCTGCGTAGTAGCACAACCTCGCACCGGAGAGCGGAACGACCACGCCGTAAAACACCCAATTTTTTAAGGTTGACCTCGGATCAGGTAGGAATACCCGCTGAACTTAA
OTU 105	1062	Basidiomycota	Agaricomycotina	Agaricomycetes	Agaricomycetidae	Agaricales	Typhulaceae	Typhula	Typhula micans 1	Pathotroph	Plant Pathogen	Probable	NULL		UDB033345	SH1649719.08FU			AACGCACCTTGCGCTCTTTGGTATTCCGAAGAGCATGCCTGTTTGAGTGTCATTAAATTCTCAAACCAATAGCTTTATTGTCTATTGGCTTTGGACTTTGAGGGTTGTTGGTGCAAATCGACTCCCTTTAAATATATTAGCTGGCATTGACTGCCAGACTATGGTGTGATAATTATCTACGCTATTGGTCTGACATGTTGGCCGCTTCTAATCGTCTTCGGACAATACATTGACAATTTGACCTCAAATCAGGTAGGACTACCCGCTGAACTTAA
OTU 106	1058	Ascomycota	Pezizomycotina	Leotiomycetes	Leotiomycetidae	Helotiales			Helotiales 1	-	-	-	-		UDB032140	SH1509644.08FU			AACGCACATTGCGCCCCTTGGTATTCCGGGGGGCATGCCTGTTCGAGCGTCATTATAACCCTCAAGCCTAGCTTGGTGTTGGAGCATGCTATCTAGCAGCTCTTAAAATCAGTGGCAGTGCCTTCCGGCTCTAAGCGTAGTAATTCTTCTCGCTATGGAAACCGGTTGGTCCGCGCCAGAACCCCCAATTTTCTATGGTTGACCTCGGATCAGGTAGGGATACCCGCTGAACTTAA
OTU 107	1054	Ascomycota							Ascomycota	-	-	-	-		UDB027689	SH1506867.08FU	156.1	77.42	AACGCACATTGCGCCCGCCAGCATTCTGGCGGGCATGCCTGTTCGAGCGTCATTTCAACCCCTCAGGCCCTGGTGCCTGGCGTCGGGGCTCTCCCTCGCGGGAGGCCCTCAGAGACAGTGGCGGACCCGCCGCGGCTCCGAGCGAAGTAGTAAAATTCTCGCTTAGGATTGTTGCGGAGGGAGATAACCGGCCGTAAAAATAGGTCCTCACGGACCGACCCAAACAAGGTTGACCTCGGATCAGGTAGGAATACCCGCTGAACTTAA
OTU 108	1048	Ascomycota	Pezizomycotina	Leotiomycetes	Leotiomycetidae	Helotiales			Helotiales	-	-	-	-		UDB031207	SH1523059.08FU	344.9	94.56	AACGCACATTGCGCCCCCTGGCATTCCGGGGGGCATGCCTGTTCGAGCGTCATTTATACCAATCTAGCCTGGCTAGGTGTTGGGCTCCGCCGTCTGGCGGGCCTTAAAACTAGTGGCGGTGCCCTTCGGCTCTACGCGTAGTAATTTTCTCGCTATAGGGTCCGGAGGGATGCTGGCCAGCAACCCCAAATTTTTCTAGGTTGACCTCGGATCAGGTAGGGATACCCGCTGAACTTAA
OTU 109	1037	Ascomycota	Pezizomycotina	Sordariomycetes	Hypocreomycetidae	Hypocreales	Hypocreaceae		Hypocreaceae	Saprotroph	Undefined Saprotroph	Possible	Microfungus		UDB025323	SH1578124.08FU	284.8	85.96	AACGCACATTGCGCCCGCCAGCATTCTGGCGGGCATGCCTGTCCGAGCGTCATTTCAACCCTCAGGGTCCCTCCGCCTCGCGCGGTCGGAGCCTGGTGTTGGGGATCGGCCCGCCCCGCGCGGCGCCGTCCCCCAAATACAGTGGCGGTCCCGCCGCAGCCTCCCCTGCGCAGTAGTTATCAACTCGCACTGGAGCGCGGCGCGGCCACGCCGTAAAACCCCCGACTTTCTGAACGTTGACCTCGGATCAGGTAGGAATACCCGCTGAACTTAA
OTU 110	989	Basidiomycota	Agaricomycotina	Agaricomycetes	Agaricomycetidae	Agaricales	Entolomataceae	Clitopilus	Clitopilus hobsonii 1	Saprotroph	Undefined Saprotroph	Probable	Agaricoid		UDB031084	SH1574428.08FU			AACGCACCTTGCGCTCCTTGGTATTCCGAGGAGCATGCCTGTTTGAGTGTCATTAAATTCTCAACTATCCAAGTTTTTGTAAACCTGGTTAGCTTGGATCATGGGAATTGCGGGCTTTTCTAAGTCGGCTTTCCTTAAATGCATTAGCAGAGCTTTTGCCGCTAGCTATTGGTGTGATAGTTATCTACGCTATTAGTGAGCTGCATGAATAGAGCTTCGCTTCTAATCGTCTTTCCAGACAATTTTGACAATCTGACCTCAAATCAGGTAGGACTACCCGCTGAACTTAA
OTU 111	988	Ascomycota	Pezizomycotina	Leotiomycetes	Leotiomycetidae	Helotiales	Leotiaceae	Neobulgaria	Neobulgaria pura 1	Saprotroph	Undefined Saprotroph	Probable	NULL		UDB034177	SH1510692.08FU			AACGCACATTGCGCCCTGTGGTATTCCGCAGGGCATACCTGTTCGAGCGTCATTACAACCTCTCCAGCTCCGCTGGGTCTTGGGGCTTGCCTTCCCGGGCATCCCTTAAAACTAGATGCGGCGCCGCGTGGCTCTAAGCGTAGTACTTTTCTCGCTTCTGGGTCCGCTGTGGTGCCTGCTACCAAACCCCAACTTTCTATGGTTGACCTCGAATCAGGTAGGGATACCCGCTGAACTTAA
OTU 112	986	Ascomycota							Ascomycota	-	-	-	-		UDB028324		181.8	80.39	AACGCACATTGCGCCCTTCGGTATTCCGTTGGGCATGCCTGTTCGAGCGTCAATTAAACCTTCAAGCTCTGCTTGGTGTTGGGCGTTTGTTCCGCCCCTGCGCGTGGACTCGCCTTAAATTCATTGGCAGCCGGTTAGTTGGCTTTCGTGCGCAGCACATTGCGTGACGGCTCCAGCTTGCCTCCTACCATTAAGCTACTATATTTTTTGACCTCGGATCAGGTAGGGATACCCGCTGAACTTAA
OTU 113	961	Ascomycota	Pezizomycotina	Dothideomycetes	Dothideomycetidae	Capnodiales	Mycosphaerellaceae		Mycosphaerellaceae	Pathotroph-Saprotroph	Plant Pathogen-Undefined Saprotroph	Probable	Microfungus		UDB020921	SH1645411.08FU	278.0	88.57	AACGCACATTGCGCCCTTTGGTATTCCGAAGGGCATGCCTGTTCGAGCGTCATTTCACCACTCAAGCCTGGCTTGGTATTGGGCGCCGCGGTCAATCCGCGCGCCTCAAAGTCTCCGGCTGAGCTGTCCGTCTCTAAGCGTTGTGATTTCATTAATCGCTTCGGAGTGCGGGCGGCCGCGGCCGTTAAATCTTTCACAAGGTTGACCTCGGATCAGGTAGGGATACCCGCTGAACTTAA
OTU 114	955	Ascomycota	Pezizomycotina	Dothideomycetes	Pleosporomycetidae	Pleosporales			Pleosporales	-	-	-	-		UDB020918	SH1591179.08FU	200.7	81.37	AACGCACATTGCGCCCTTTGGTATTCCTTAGGGCATGCCTGTTCGAGCGTCATTTACAACTTCAAGCTCCGCTTGGTGTTGGGTGTCTGTCCCGCCCCCCGGGGTGCGGACTCGCCTCAAATTCATTGGCGGCCGGTACATTGGCTTCGAGCGCAGCAGAAACGCGAACTCGAGGACGGTGGATCCGCTCCCAGAAGCCAACCCCATATTTTGACCTCGGATCAGGTAGGGATACCCGCTGAACTTAA
OTU 115	943	Ascomycota	Pezizomycotina	Dothideomycetes	Pleosporomycetidae	Pleosporales			Pleosporales	-	-	-	-		UDB025129	SH1635394.08FU	229.9	83.98	AACGCACATTGCGCCCCTTGGTATTCCATGGGGCATGCTTGTTCGAGCGTCATTTGTACTCTCAAGCTTTGCTTGGTGTTGGGTGTTTGTCCTTTCCTTTGCGTTTGGACTCGCCTTAAATTTATTGGCAGCCAATATACTGGTTTGAAGCGCAGCACAATTTGTGATTCTCTCTAGCATTATTGCATCCATTAAGCATATTTTAACACTTTTGACCTCGGATCAAGTAGGGATACCCGCTGAACTTAA
OTU 116	941	Basidiomycota	Agaricomycotina	Agaricomycetes	Agaricomycetidae	Agaricales	Entolomataceae	Clitopilus	Clitopilus scyphoides 1	Saprotroph	Undefined Saprotroph	Probable	Agaricoid		UDB024700	SH1574424.08FU			AACGCACCTTGCGCTCCTTGGTATTCCGAGGAGCATGCCTGTTTGAGTGTCATTAAATTCTCAACTATACAAGTTTTTATTAACCTGTATGGCTTGGATCATGGGGTTTGCGGGCTTCCTGAGTCGGCTATCCTTAAATGCATTAGCAGAGCTTTTGCCGCTAATCTATGGTGTGATAATTATCTACGCCATTGAGAAGTGACATGTTGAGGCTTCGCTTCTAATCGTCTTCACAGACAACATTTGACAATCTGACCTCAAATCAGGTAGGATTACCCGCTGAACTTAA
OTU 117	917	Basidiomycota	Agaricomycotina	Tremellomycetes		Trichosporonales	Trichosporonaceae		Trichosporonaceae	-	-	-	-		UDB027341	SH1514262.08FU	255.6	85.5	AACGCAACTTGCGCTCTCTGGTATTCCGGAGAGCATGCCTGTTTGAGTGTCATGAAATCTCAACCATTAGGGTTTCTTAATGGCTTGGATTTGGAGGTTGCCATTCTAAATGGCTCCTCTTAAAGGAGTTAGCAAGTTTTACTATTGCTATCTGGCGTAATAAGTTTCGCTGGAATGGTATTGTGAAGCGTGCTTCTAATCGTCTTCGGACAATTACTTTGACTCTGGCCTCAAATCAGGTAGGACTACCCGCTGAACTTAA
OTU 118	916	Basidiomycota	Agaricomycotina	Agaricomycetes	Agaricomycetidae	Agaricales	Psathyrellaceae	Coprinellus	Coprinellus domesticus	Saprotroph	Undefined Saprotroph	Probable	NULL		UDB011849	SH1508488.08FU	513.2	100.0	AACGCACCTTGCGCTCCTTGGTATTCCGAGGAGCATGCCTGTTTGAGTGTCATTAAATTCTCAACCTCACCAGTTTTCTGAACTGTTCTCCGAGGCTTGGATGTGGGGGTTTGTGCAGGCTGCCTCAGCGCGGTCTGCTCCCCTGAAATGCATTAGCGAGTTCGATACTGAGCTCCGTCTATTGGTGTGATAATTATCTACGCCGTGGATCGGGGCTTAGACTCGCTTCTAACCGTCCGCAAGGACAATACCTTGACAATTTGACCTCAAATCAGGTAGGACTACCCGCTGAACTTAA
OTU 119	914	Ascomycota	Pezizomycotina	Dothideomycetes	Pleosporomycetidae	Pleosporales			Pleosporales	-	-	-	-		UDB028324		216.2	83.07	AACGCACATTGCGCCCCTTGGTATTCCATGGGGCATGCCTGTTCGAGCGTCATTTGTACCCTCAAGCTATGCTTGGTGTTGGGTGATTGTCCGGCCTTTATAGCCAGGACTCGCCTTAAAGTAATTGGCAGCCAGTGTTTTGGTATAAAGCGCAGCACATTTTGCGATTTACTCCAATAATATTAGCAACCATAAAGCTCATCTATCACTTTTGACCTCGGATCAGGTAGGGATACCCGCTGAACTTAA
OTU 120	895	Basidiomycota							Basidiomycota	-	-	-	-		UDB027341	SH1514262.08FU	199.0	81.47	AACGCAACTTGCGCCCTCTGGTATTCCGGAGGGCATGCCTGTTTGAGTGTCATGTAGACTCAATCCCTCGGGTTTCCGAGGAGATTGGACTTGGGTGTCTGCCTCTTCTGGCTCGCCTTAAAAGACTTAGCAGGATAGCACCATAGTCGACGTAATAAGTTTCGTCGGTGAAGGTGTGATGTCTGCTTACAATCGCCCTTGGGCACTTTTGACTCTGACCTCAAATCAGGTAGGACTACCCGCTGAACTTAA
OTU 121	893	Basidiomycota	Agaricomycotina	Agaricomycetes	Agaricomycetidae	Agaricales	Tricholomataceae	Calyptella	Calyptella sp.	Saprotroph	Undefined Saprotroph	Probable	NULL		UDB037654	SH1641242.08FU	423.9	94.85	AACGCACCTTGCACTCTTTGGTATTCCGAAGAGTATGCTTGTTTGAGTATCATTAAATTCTCAAACCACAACTTGGTTTCATATCAAGTTTGTGGCTTTGGATGTGGAGGTTGCAGGATTCTTGTAAAGTCTGCTCCTCTTAAATGCATTAGTGGTTATTGATTCCACTTCTTGGTGTGATAATATCTACGCCTTGTAAGATTGGGTCTAATGTAGCTGCTATCGAACCGTCTGTAAAGACAATTTGAACCATTTGATCTCAAATCAAGTAGGACTACCCGCTGAACTTAA
OTU 122	893	Ascomycota	Saccharomycotina	Saccharomycetes	Saccharomycetidae	Saccharomycetales	Debaryomycetaceae	Debaryomyces	Debaryomyces sp.	Saprotroph	Undefined Saprotroph	Possible	Yeast		UDB027471	SH1516571.08FU	396.4	93.1	AACGCACATTGCGCCCTCTGGTATTCCAGAGGGCATGCCTGTTTGAGCGTCATTTCTCTCTCAAACCCTTGGGTTTGGTATTGAGTGATACTCTTAGTCGAACTAGGCGTTTGCTTGAAATGTATCGGCATGAGTAGTACTGAATAGTGCTTCAAGACTTTTTCAATGTATTAGGTTTATCCAACTCGTTGAATGGTTTAGTAGTAAATTTTTGGTATTATTGGCTCGGCCTTACAACACAACAAACAAGTTTGACCTCAAATCAGGTAGGACTACCCGCTGAACTTAA
OTU 123	887								Fungi	-	-	-	-		UDB024118	SH1516552.08FU	326.0	87.46	AACGCACCTTGCGCCCTTTGGTATTCCGAAGGGCACACCTGTTTGAGTGTCATTAATTCCTCAACCCTGTCATTTTATTAATGGAATGGCAATGGTTGGATGCTGAGTGTTGCTGGATTTTCAGTTCAGCTCACTTTAAATTTATGAGCAGGCTCCTATCGTTTTCGGACTGACTCAACGTAATAAGAAATTTCGTTGAGGACGCTTGACTGCGGCCGAATTGTAGGGAAATGCCGCTACTAGTTGACCCTTATATTTTAGACCTCAAATCAGGTGGGACTACCCGCTGAACTTAA
OTU 124	883	Ascomycota							Ascomycota	-	-	-	-		UDB028324		157.8	78.38	AACGCACATTGCGCCCCTTGGTATTCCATTGGGCATGCCTGTTCGAGCGTCATTTACACCCTCAAGCTACGCTTGGTGTTGGGCGTCTGTCCCCGCTTCCCGCGAGGACTCGCCCCAAATCCATTGGCAGCGGCATCGCCGGCTTCTCGCGCAGCACATTGCGCTCCAGAAGGCTCCCGGCGGGCTCGCGTCCAGCAAGAACCCCCCCCAGTTTGACCTCGAATCAGGTAGGGATACCCGCTGAACTTAA
OTU 125	867	Ascomycota							Ascomycota	-	-	-	-		UDB028324		183.5	80.63	AACGCACATTGCGCCCTTCGGTATTCCGTTGGGCATGCCTGTTCGAGCGTCATTTAAACCTTCAAGCTCTGCTTGGTGTTGGGTGTTTGTTCCGCCTCAGCGTGTGGACTCGCCTTAAATTCATTGGCAGCCGGTATGTTGGCTTCGTGCGCAGCACATTGCAAGCGATTTCAACAGACCCCCTTCCACAAGCCTTTTTTTACTTTGACCTCGGATCAGGTAGGGATACCCGCTGAACTTAA
OTU 126	866	Ascomycota							Ascomycota	-	-	-	-		UDB027689	SH1506867.08FU	169.8	78.42	AACGCACATTGCGCCCGCCAGCATTCTGGCGGGCATGCCTGTTCGAGCGTCATTTCAACCCCTCAGGCCCTGGTGCCTGGCGTCGGGGCTCTCCCTCGCGGGAGGCCCCCAGAGACAGTGGCGGACCCGCCGCGGCTCCGAGCGCAGTAGTAAAATATCTCGCTTAGGAGGCCCGCGGAGGAGCTTTCCGGCCGTAAAACCAGGTCTGCAAAGACCGACCCCACCAAGGTTGACCTCGGATCAGGTAGGAATACCCGCTGAACTTAA
OTU 127	844	Ascomycota	Pezizomycotina	Sordariomycetes	Hypocreomycetidae	Hypocreales	Clavicipitaceae		Clavicipitaceae	Saprotroph	Undefined Saprotroph	Possible	Microfungus		UDB035685	SH1552440.08FU	298.6	86.55	AACGCACATTGCGCCCGCCAGTATTCTGGCGGGCATGCCTGTTCGAGCGTCATTTCAACCCTCAAGTCCCCTGTGGACTCGGTGTTGGGGACCGGCGAGACAGCCGCGGATCTTCTTCCGCAGCGAGTCGCCGCCCCCCAAATGACTTGGCGGCCTCGTCGCGGCCCTCCTCTGCGTAGTATAGCACACCTCGCAACAGGAGCCCGGCGAATGGCCACTGCCGTAAAACCCCCCAACTTTTTCAGAGTTGACCTCGAATCAGGTAGGAATACCCGCTGAACTTAA
OTU 128	839	Ascomycota	Pezizomycotina	Sordariomycetes	Xylariomycetidae	Xylariales	Xylariaceae	Hypoxylon	Hypoxylon sp. 1	Saprotroph	Undefined Saprotroph	Probable	NULL		UDB033690	SH1514469.08FU			AACGCACATTGCGCCCATCAGTATTCTGGTGGGCATGCCTGTTCGAGCGTCATTTCAACCCTTAAGCCTAGCTTAGTGTTGGGAATCTGCTGTACTGCAGTTCCTTAAAGACAGTGGCGGAGCGGCGGTAGTCCTCTGAGCGTAGTAATTTATTTCTCGCTTTTGTCAGGCTCTGTCCTCCCGCCATAAAACCCCCAATTTTTTAGTGGTTGACCTCGGATCAGGTAGGAATACCCGCTGAACTTAA
OTU 129	823	Basidiomycota	Agaricomycotina	Agaricomycetes	Agaricomycetes sbc Incertae sedis	Cantharellales	Ceratobasidiaceae	Ceratobasidium	Ceratobasidium sp.	Pathotroph-Saprotroph-Symbiotroph	Endomycorrhizal-Plant Pathogen-Undefined Saprotroph	Possible	Microfungus		UDB017026	SH1554510.08FU	405.0	91.46	AACGCACCTTGCGCTCCTTGGTATTCCTTGGAGCATGCCTGTTTGAGTATCATGAAATTATCAAAATAATTCTTTTGTTCATTCGATTGAATTTATTTTGGACTTGGAGGTCTGCAGATTCACGTCTGCTCCTCTTAAATAAATTAGCTGGATCTCAGTGAGCTCGGTTCCACTCGGCGTGATAAGTATCACTCGCTGAGGACACTGTAAAAGGTGGCCGGGATTGCGGATGAACCGCTTCTAATCGTCCATTTACTTGGACAACAATACTTTATGATCTGATCTCAAATCAGGTAGGACTACCCGCTGAACTTAA
OTU 130	821	Ascomycota							Ascomycota	-	-	-	-		UDB020921	SH1645411.08FU	195.6	82.23	AACGCACATCGCGCCCTTTGGCATTCCGAGGGGCATGCCTGTTCGAGCGTCATTACACCACTCAAGCCCGGCTTGGTATTGGGCGGCGGGGCTCCCCCGCGCCTTAATTTCACCGGCTGGACAACCCGTATCTCAGCGTTGTGGCATCAAATTCGCTGGCGAGAAGGGTGGCCCGTGCCGTTAAAATTTCCATCAAGGTTGACCTCGGATCAGGTAGGGATACCCGCTGAACTTAA
OTU 131	814	Ascomycota	Pezizomycotina	Pezizomycetes	Pezizomycetidae	Pezizales	Pezizaceae	Peziza	Peziza sp.	Saprotroph-Symbiotroph	Dung Saprotroph-Ectomycorrhizal-Litter Saprotroph-Undefined Saprotroph	Possible	Pezizoid		UDB001572	SH1510523.08FU	468.5	100.0	AACGCACATTGCGCCCTATGGTATTCCGTAGGGCATGCCTGTCTGAGCGTTAGTTCCCCACACACTCAAGTATCCTTTATTTGGGATTCTTGGAATGATTTGGAGAGGTGTCTCATCATAGAGATGCCCTCCAGAAATTCATAGGCAGTATGGTTTGCACCGGAACCAGACGTAATAATAATAAAATCGTTTGTTTGGGAATAATTGTGCTTGCCTTAACCCACCCATTTCTCTCATTTGGGTGACCTCAGATCAGGTAGGGATACCCGCTGAACTTAA
OTU 132	807	Ascomycota							Ascomycota	-	-	-	-		UDB020921	SH1645411.08FU	193.8	81.97	AACGCACATTGCGCCCTTTGGCATTCCGAGGGGCATGCCTGTTCGAGCGTCATTACACCACTCAAGCCTGGCTTGGTATTGGGCGGTAGGGCTCCCCTACGCCTCAATTTCACCGGCTGGACAACCCGTATCTCAGCGTTGTGGCATTCAATTCGCTGGCGAGAAGGGCGGTCCGCGCCGTTAAAATTTCTATCAAAGGTTGACCTCGGATCAGGTAGGGATACCCGCTGAACTTAA
OTU 133	787	Ascomycota	Pezizomycotina	Leotiomycetes	Leotiomycetidae	Helotiales	Dermateaceae	Mollisia	Mollisia dilutella 1	Pathotroph-Symbiotroph	Endophyte-Plant Pathogen	Probable	Microfungus		UDB003005	SH1545977.08FU			AACGCACATTGCGCCCCCTGGCATCCCGGGGGGCATGCCTGTTCGAGCGTCATTACAACCACTCAAGCCTTGGCTTGGTCTTGGGGTGCGCGGTCTCGCGGCCCCTAAAATCAGTGGCGGTGCCCGTCGGCTCTACGCGTAGTTATACTCCTCGCGACTGAGTCCGGCCGGGCCACCTGCCAGCAACCCCTTTATTTTTCAGGTTGACCTCGGATCAGGTAGGGATACCCGCTGAACTTAA
OTU 134	782	Basidiomycota	Agaricomycotina	Agaricomycetes	Agaricomycetidae	Agaricales	Hymenogastraceae	Hebeloma	Hebeloma mesophaeum	Symbiotroph	Ectomycorrhizal	Highly Probable	Agaricoid	Short or medium-distance fringe subtype a, f	UDB018001	SH1563787.08FU	528.6	100.0	AACGCACCTTGCGCTCCTTGGTATTCCGAGGAGCATGCCTGTTTGAGTGTCATTAAATTCTCAACTATTATCAGCTTTTGCTGATGATGGCTTGGATATGGGGGTTTATTTTGCTGGCTTCACAGAATGTCAGCTCCCCTTAAATGCATTAGCCGGTGCCCCGCGTGGACTGTCTATTGGTGTGATAATTATCTACGCCGTGGACATCTACAATCATATGGGTTTGCGCTGCTTCCAACCGTCTGTTTACTCAGACAATACATGACAATTTGACCTCAAATCAGGTAGGACTACCCGCTGAACTTAA
OTU 135	775	Basidiomycota	Agaricomycotina	Agaricomycetes	Agaricomycetes sbc Incertae sedis	Cantharellales	Ceratobasidiaceae		Ceratobasidiaceae	Pathotroph-Saprotroph-Symbiotroph	Endomycorrhizal-Plant Pathogen-Undefined Saprotroph	Possible	Microfungus		UDB028157	SH1608945.08FU	369.0	88.02	AACGCACCTTGCGCTCCTTGGTATTCCTTGGAGCATGCCTGTTTGAGTATCATGAGCAAATCTCAAAGTCGAACCCATTTGTTAATTCAATTGGTGTTTGCTTTGGACTTGGAGGTCTTTGCAGATTTCACCGTCTGCTCCTCTTAAATGCAGTAGCTGGATCTCAGTATTATGCTTGGTTCCACTCGGCGTGATAAGTATCACTCGCTGAGGACACTGGTAAAAAAGGTGGCCAGGAAAATACCGATCGAACCGCTTCTAACGGTCTATTAACTTAGACGATCCCTTAAGTTTGATCTCAAATCAGGTAGGACTACCCGCTGAACTTAA
OTU 136	775	Basidiomycota	Agaricomycotina	Tremellomycetes	Tremellomycetes sbc Incertae sedis	Cystofilobasidiales			Cystofilobasidiales	-	-	-	-		UDB028113	SH1556067.08FU	296.8	83.99	AACGCACCTTGCGCTCTTTGGTATTCCGAAGAGCATGCCTGTTTGAGTGTCATGAAACTCTCAACTCCCAACTTTCTTAATAGTCGGTTGGGAGCTTGGACTTGAGCGCTGCTGGTCTTTATTGACCGGCTCGCTTGAAATGAATTAGCAGATCCTTTTTGTAATCGGTTCCACTCGACGTGATAAGTATTTCGCCGAGGACATCTTAACGGATGGCCGAGATAAAGAAAGTCTTTAGATCCGCTTCTAATTCTTAGCTAGAGCTTGCTCTACTAAACCCCTTTTATGATCTGGCCTCAAATCAGGTAGGACTACCCGCTGAACTTAA
OTU 137	773	Ascomycota	Pezizomycotina	Leotiomycetes	Leotiomycetidae	Helotiales	Helotiaceae	Crocicreas	Crocicreas furvum 1	Saprotroph	Undefined Saprotroph	Probable	Pezizoid		UDB003037	SH1545929.08FU			AACGCACATTGCGCCCCCTGGCATTCCGGGGGGCATGCCTGTTCGAGCGTCATTGCAACCACTCAAGCGCCCGCTTGGTCCTGGGGTCCGCGGTCCCGCGGCCCCTAAAATCAGTGGCGGTGCCCCTCGGCTCTTCGCGCAGTACAGTACCTCTCGCGACTGGGCCCGGCGGCGCACCGGCCAGCAACCCCAACTTCTACAGGTTGACCTCGGATCAGGTAGGGATACCCGCTGAACTTAA
OTU 138	765	Ascomycota							Ascomycota	-	-	-	-		UDB025206	SH1516903.08FU	128.6	76.05	AACGCACATTGCGCCCGGGAGTAATCTCCCGGGCATGCCTGTCCGAGCGTCATTTCAGCCCTCGAGCCGCTTTTAGTGGATCGGTGTTGGGGCACTACCGTCAAACGTAGGCCCCTAAATGAAGTGGCGGTCCCGCCGCGGCGTCCTATGCGTAGTAACTTTCAGTCTCGCATCGGGTCCCGGCGGTGACCTGCCGTCAACCTAATTATTTTCTATGGTTTGACCTCGGATCAGGTAGGGTTACCCGCTGAACTTAA
OTU 139	759	Mortierellomycota	Mortierellomycotina	Mortierellomycetes	Mortierellomycetes	Mortierellales	Mortierellaceae	Mortierella	Mortierella sp.	Saprotroph-Symbiotroph	Endophyte-Litter Saprotroph-Soil Saprotroph-Undefined Saprotroph	Possible	Microfungus		UDB027447	SH1557013.08FU	480.5	93.86	AACGCATATTGCGCTCTTTGGTATTCCGAAGAGCATGCTTGTTTGAGTATCAGTAAACACCTCAAAGCCTTCAATTCAGTTTGAAAGCTTTGGACTTGAGCAATCCCAACATCAGTCTCGCGACTGACGGAGGGCTGCTTGAAATGCAGGTGCAGCTGGACATTCTCCTGAGCTATAAGCATATTTATTTAGTCCCGTCAAACGGATTATTACTTTTGCTGCAGCTAACATAAAGGGAGTCTGACCGTATTGGCTGACTGATGCAGGATTTCACAAGGGCTGGCAACAGCTTCTTGTAAAACTCGATCTCAAATCAAGTAAGACTACCCGCTGAACTTAA
OTU 140	753	Ascomycota	Pezizomycotina	Sordariomycetes	Hypocreomycetidae	Hypocreales	Clavicipitaceae		Clavicipitaceae	Saprotroph	Undefined Saprotroph	Possible	Microfungus		UDB035685	SH1552440.08FU	278.0	85.56	AACGCACATTGCGCCCGCCAGTATTCTGGCGGGCATGCCTGTTCGAGCGTCATTTCAACCCTCAAGCCCTGCTTGGTGTTGGGGACCGGCTCAGCGGGTGCGGGCTTCGGCCCGTCCCGTGCCGCCCCCGAAATGGATCGGCGGTCTCGTCGCAGCCTTCTTTGCGTAGTAACATACCACCTCGCAACAGGAGCGCGGCGCGGCCACTGCCGTAAAACGCCCAACTTTTTAGAGTTGACCTCGAATCAGGTAGGAATACCCGCTGAACTTAA
OTU 141	750	Ascomycota	Pezizomycotina	Sordariomycetes	Hypocreomycetidae	Hypocreales			Hypocreales	Saprotroph	Undefined Saprotroph	Possible	Microfungus		UDB019759	SH1568211.08FU	226.5	82.72	AACGCACATTGCGCCCGCTGGTACTCCGGCGGGCATGCCTGTCCGAGCGTCATTTCAACCCTCAGGTCCCCCTTCCGGGGGCGGACCTGGTGCTGGGGCTCGGCCGTCCTCGTGGCGGCCGTCCCTTAAATCCAGTGGCGGTCACGCCGTGATCCCTTGCGTAGTACTACACCTCGCACCGGAGAGCGACGCGGCCCGCCGTAAAACACCCAATTTTTCAATGGTTGACCTCGGATCAGGTAGGAATACCCGCTGAACTTAA
OTU 142	742	Ascomycota							Ascomycota	-	-	-	-		UDB028324		187.0	80.78	AACGCACATTGCGCCCCTTGGTATTCCATGGGGCATGCCTGTTCGAGCGTCATCTACACCCTCAAGCACTGCTTGGTGATGGGCGTCTGTCCCGCCTTCGCGCGCGGACTCGCCCCAAAGGCATTGGCAGCGGTCCCGATCGCCCTCTCGCGCAGCACATTTGCGCTTCTCGAGGCGGCGGGTTCGCGTCCACGAAGCCCTTTTTACCACGTTTGACCTCGGATCAGGTAGGGATACCCGCTGAACTTAA
OTU 143	722	Ascomycota							Ascomycota	-	-	-	-		UDB028275	SH1649293.08FU	120.0	75.0	AACGCACATTGCGCCCGCTAGTATTCTGGCGGGCATGCCTGTTCGAGCGTCCTTTGGACCCTCGGGCCCCGGTGGATTCGTCCCCCAGCGGCCCGGCGTTGGAGGCCCGCGGCTGCCGCGGCCCCCTAAATACAGTGGCGGACCTCTCCAGGCCCTGGCGTAGTAAACAATCTCGCCTTCGGCTCCGGAGCAGTGCCTTGCCCCCAGCACCAACTTATAAGTCTGGACCTCGAATCAGGTAGGAATACCCGCTGAACTTAA
OTU 144	719	Basidiomycota	Agaricomycotina	Agaricomycetes	Agaricomycetidae	Agaricales	Hymenogastraceae	Hebeloma	Hebeloma fusisporum	Symbiotroph	Ectomycorrhizal	Highly Probable	Agaricoid	Short or medium-distance fringe subtype a, f	UDB036155	SH1563824.08FU	535.5	100.0	AACGCACCTTGCGCTCCTTGGTATTCCGAGGAGCATGCCTGTTTGAGTGTCATTAAATTCTCAACCTTTATCAGCTTTTGTTGATAACGGCTTGGATATGGGGGTTTTTTTTTGCTGGCTTCTTCACAGATGGTCAGCTCCCCTTAAATGCATTAGCCGGTGCCCCGCGTGGACTGTCTATTGGTGTGATAATTATCTACGCCGTGGACATCTGCAATCATATGGGTTTGCACTGCTTCTAACGGTCTGTTTGTTCAGACAATACATGACAATTTGACCTCAAATCAGGTAGGACTACCCGCTGAACTTAA
OTU 145	714	Ascomycota	Pezizomycotina	Sordariomycetes	Hypocreomycetidae	Hypocreales	Nectriaceae	Gibberella	Gibberella sp.	Pathotroph	Plant Pathogen	Probable	NULL		UDB035699	SH1546323.08FU	341.5	91.95	AACGCACATTGCGCCCGCCAGTATTCTGGCGGGCATGCCTGTTCGAGCGTCATTTCAACCCTCAAGCCCTCGGGTTTGGTGTTGGGGATCGGCGAGCCTTTCTGGCAAGCCGGCCCCGAAATCTAGTGGCGGTCTCGCTGCAGCCTCCATTGCGTAGTAGTAAAACCCTCGCAACTGGAACGCGGCGCGGCCAAGCCGTTAAACCCCCAACTTCTGAATGTTGACCTCGGATCAGGTAGGAATACCCGCTGAACTTAA
OTU 146	703	Ascomycota	Pezizomycotina	Dothideomycetes	Pleosporomycetidae	Pleosporales			Pleosporales	-	-	-	-		UDB028324		200.7	81.89	AACGCACATTGCGCCCCTTGGTACTCCATGGGGCATGCCTGTTCGAGCGTCATTTACACCCTCAAGCTCAGCTTGGTGTTGGGCGTCTGTCCCGCTTCGTGCGCGGACTCGCCTCAAATGCATTGGCAGCGGTCTTGCCAGCTTCTCGCGCAGCACATTGCGCTTCTAGAGGCTTTGGCGGATCGGCGTCCATCAAGTACACCCACAGTTTGACCTCGGATCAGGTAGGGATACCCGCTGAACTTAA
OTU 147	686	Ascomycota	Pezizomycotina	Dothideomycetes	Pleosporomycetidae	Pleosporales			Pleosporales	-	-	-	-		UDB028324		271.1	87.35	AACGCACATTGCGCCCCTTGGTATTCCATGGGGCATGCCTGTTCGAGCGTCATTTGTACCCTCAAGCTTTGCTTGGTGATGGGTGTTTGTTCCGCTGCAACGCGTGAACTCGCCTCAAATCAATTGGCAGCCGGCAATCTGGTGTTGGAGCGCAGCACATTTTGCGCTCTTCGCTGTGGATTGCGGGCGTCCATGAAGCCTATATTTTCGCGCTTGACCTCGGATCAGGTAGGGATACCCGCTGAACTTAA
OTU 148	660	Basidiomycota	Agaricomycotina	Tremellomycetes	Tremellomycetes sbc Incertae sedis	Cystofilobasidiales			Cystofilobasidiales	-	-	-	-		UDB028113	SH1556067.08FU	300.3	83.78	AACGCACCTTGCGCTCCTTGGTATTCCGAGGAGCATGCCTGTTTGAGTGTCATGAAACTCTCACCCTTCAACTTTCTTAATAGTGGTTGCAGGCGTGGACTTGAGCGCTGCTGGTCTTTATTGACCGGCTCGCTTGAAATGAATTAGCAGATCCTTTTTGTAATCGGTTCCACTCGACGTGATAAGTATTTCGCCGAGGACATCTTAACGGATGGCCGAGATAAGAAAAGTCTTTTAGATCCGCTTCTAATTCTTAGCCTTACGCAAGTAAGCTAAACCCATTTTATGATCTGGCCTCAAATCAGGTAGGACTACCCGCTGAACTTAA
OTU 149	649	Ascomycota	Pezizomycotina	Leotiomycetes	Leotiomycetidae	Helotiales	Dermateaceae	Pyrenopeziza	Pyrenopeziza millegrana 1	Pathotroph	Plant Pathogen	Probable	NULL		UDB003071	SH1545961.08FU			AACGCACATTGCGCCTCCTAGTATTCTGGGGGGCATGCCTGTTCGAGCGTCATTACAACCACTCAAGCCCTGGCTTGGTCTTGGGGTGCGCGGTCCGGCGGCCCCTAAAATCAGTGGCGGTGCCCGTCGGCTCTACGCGTAGTACATACTCCTCGCGACTGAGGCCGGCTGGGACACCTGCTAGCACGCCCTTATTATTACAGGTTGACCTCGGATCAGGTAGGGATACCCGCTGAACTTAA
OTU 150	644	Ascomycota	Pezizomycotina	Pezizomycetes	Pezizomycetidae	Pezizales	Pyronemataceae	Scutellinia	Scutellinia torrentis	Saprotroph	Undefined Saprotroph	Probable	Pezizoid		UDB019762	SH1556387.08FU	439.3	100.0	AACGCACATTGCGCCTCCTGGTATTCCGGGAGGCATGCCTGTTCGAGCGTCATTAAAAACCACTCAAGCTCTTTTGCTTGGTATTGGGAGAGGAGTGCACTCGTTGCCCTCCCTTCCGAAATTCAATGGCGGAAAGCCCCATGTGCCCCGGCGTAGTAAGTTTTCTTTCGCTTGGAACGTGAGGTGATCCTGCCGCAAACCCCCAATTCTTTCTAGGTTGACCTCGGATCAGGTAGGGATACCCGCTGAACTTAA
OTU 151	631	Basidiomycota	Agaricomycotina	Agaricomycetes	Agaricomycetidae	Agaricales	Psathyrellaceae	Parasola	Parasola sp.	Saprotroph	Undefined Saprotroph	Probable	Agaricoid		UDB036844	SH1523651.08FU	465.1	95.79	AACGCACCTTGCGCTCCTTGGTATTCCGAGGAGCATGCCTGTTTGAGTGTCATTAAATTCTCAACCTCACCTGGTTTTCGAACTTGTGTGATGGCTTGGACTTGGGAGTTTTGCAGGCTACAGTTTACTGCGGCTCTGCTCTCCTTAAATGTATTAGCAGGTCTTTTACCTCTATCCCAACGGTGTGATAATCTATCTACGCTGCTGGTTTGGAGACCCTTAACCGGGGGACTGGCTTCTAACCGTCTGCAAAGACAAATGATAACTCTTGACCTCAAATCAGGTAGGACTACCCGCTGAACTTAA
OTU 152	621	Basidiomycota	Agaricomycotina	Agaricomycetes	Agaricomycetidae	Agaricales			Agaricales	-	-	-	-		UDB018822	SH1553002.08FU	250.5	82.26	AACGCACCTTGCGCTCCTTGGTATTCCGAGGAGCATGCCTGTTTGAGTGTCATTAAATTCTCAATCCATATGATTTTTGTCACATGGACTTGGATGTGGGAGCTTGCAGGCCTTTTTCCGGTCTGCTCTCCTTAAATGCATTAGTTGGACTTGTTGCAACAGTCTATGGTGTGATAATTATCTATGCCTTGCCTGGTGTGGCCTTGTGGTCTGGCTTCTAACAGTCCATTCAATTGGACAGCTCATTGACAATTTGACCTCAAATCAGGTAGGACTACCCGCTGAACTTAA
OTU 153	621	Ascomycota							Ascomycota	-	-	-	-		UDB027689	SH1506867.08FU	175.0	78.52	AACGCACATTGCGCCCGCTAGTATTCTGGCGGGCATGCCTGTTCGAGCGTCATTTCGACCCTCAAGCCCCCGCGGCTTGGTGTTGGGCGGTTTCTACGGCAGTGGCCGTAGCCCCCGAAATGCAGTGGCGGTCCCGACACGACCCCGAGCGCAGTACATCCACTCGCCCTGGGCGTCGCGGCGGGCGACCGGCCGTAAAACCCCTACAGGCGCCTCCGGGCCCCGTAGACACGCAAAGGTTGACCTCGGATCAGGTAGGAATACCCGCTGAACTTAA
OTU 154	585	Ascomycota	Pezizomycotina	Sordariomycetes					Sordariomycetes 1	-	-	-	-		UDB024433	SH1648729.08FU			AACGCACATTGCGCCCGCCAGTATTCTGGCGGGCATGCCTGTTCGAGCGTCATTTCAACCATCAAGCCCCCGGGCTTGCGTTGGGGCCCTGCGGCTGCCGCAGACCCCTAAAACCAGTGGCGGGCTCGCTGTCACACCGAGCGCAGTAGCAATATCTCGCTCTGGGCGTGGCGCGGGTGCTTGCCGTAAAACACACCACTTAACAAGGTTGACCTCGGATCAGGTAGGAATACCCGCTGAACTTAA
OTU 155	582	Ascomycota	Pezizomycotina	Dothideomycetes	Pleosporomycetidae	Pleosporales			Pleosporales	-	-	-	-		UDB020918	SH1591179.08FU	226.5	83.27	AACGCACATTGCGCCCTTCGGTTATTCCTTAGGGCATGCCTGTTCGAGCGTCATTTCAACCTTCAAGCCTGGCTTGGTGTTGGGCGCTGTCCCGCCCCCGCGCGCGGACTCGCCTCGAATGAATTGGCAGTCGCACCCTCCGAGCCGCGAGCGCAGCACAAGTCGCGCCCGCCGGCCCGCTGGGACGGACGCTCCATGAGACCCCCCACAGTCTTGACCTCGGATCAGGTAGGGATACCCGCTGAACTTAA
OTU 156	575	Ascomycota	Saccharomycotina	Saccharomycetes	Saccharomycetidae	Saccharomycetales			Saccharomycetales	Saprotroph	Undefined Saprotroph	Possible	Yeast		UDB033935	SH1516571.08FU	214.4	80.4	AACGCACATTGCGCCCTCTGGTATTCCGGAGGGCATGCCTGTTTGAGCGTCATTTCTCTCTCAAAACTTCGGTTTTGGTATTGAGTGATACTCTCTTCTGGGTTAACTTGAAATAGTGAATTTGGCAAGAGTGTGCTTTTGTGGCCTCTTGACTGAGATAATGTATTAGGTTCTACCAACTCGTTATAGCAGTTTGAGAAAGTCCTCTGGCATATATAGCTCGGCCTAACAACCATTCTAAAAGTTTGACCTCAAATCAGGTAGGATTACCCGCTGAACTTAA
OTU 157	572	Ascomycota	Pezizomycotina	Dothideomycetes	Pleosporomycetidae	Pleosporales			Pleosporales	-	-	-	-		UDB025129	SH1635394.08FU	214.4	82.81	AACGCACATTGCGCCCCTTGGTATTCCATGGGGCATGCCTGTTCGAGCGTCATTTGTACTCTCAAGCCTTGCTTGGTGTTGGGTGTTTGTCTCTGCTCTGCTTAGACTCGCCTTAAATATATTGGCAGCCGGTATACTGGTTTGAAGCGCAGCACATTTGCAATTCAAGCCTGCTATTATTGGTATCCACAAAGAATATCAACACTTTTGACCTCGGATCAGGTAGGGATACCCGCTGAACTTAA
OTU 158	565	Basidiomycota	Agaricomycotina	Agaricomycetes	Agaricomycetidae	Agaricales	Entolomataceae	Entoloma	Entoloma rhombisporum 1	Pathotroph-Saprotroph-Symbiotroph	Ectomycorrhizal-Fungal Parasite-Soil Saprotroph-Undefined Saprotroph	Possible	Agaricoid		UDB024645	SH1555862.08FU			AACGCACCTTGCGCTCCTTGGTATTCCGAGGAGCATGCCTGTTTGAGTGTCATGAAATTCTCAACCTTTCTGGCTTTTGCTAGTCAGGCTTGGATTATGGGAGTTGCTGGCTTTTGAAGTCAGCTCTTCTAAAATGCATTAGCAAGATCATTGCTGCTCATCATTGGTATGATAATTATCTATATCATTGAGAGTCAGTTTCCTTTATTGGAGGTTTTTGCTCCTAACAGTCTTTAACAAGACAATATTTGACAATTTTGACCTCAAATCAGGTAGGACTACCCGCTGAACTTAA
OTU 159	562	Ascomycota	Pezizomycotina	Dothideomycetes	Pleosporomycetidae	Pleosporales			Pleosporales	-	-	-	-		UDB028324		252.2	86.06	AACGCACATTGCGCCCCTTGGTATTCCATGGGGCATGCCTGTTCGAGCGTCATTTGTACCCTCAAGCTTTGCTTGGTGTTGGGTGTTTGTCCTCCCCTCTGCGTTTGGACTCGCCTTAAAGCAATTGGCAGCCAGTGTTTTGGTATTGAAGCGCAGCACATTTTGCGATTCTAGCCTTTAATACTTGCGTCCATAAGCCTTTTTTAACTTTTGACCTCGGATCAGGTAGGGATACCCGCTGAACTTAA
OTU 160	552	Ascomycota	Pezizomycotina	Pezizomycetes	Pezizomycetidae	Pezizales	Pyronemataceae	Cheilymenia	Cheilymenia sp.	Saprotroph	Dung Saprotroph-Undefined Saprotroph	Highly Probable	Pezizoid		UDB031685	SH1529948.08FU	396.4	96.85	AACGCACATTGCGCCTCCTGGTATTCCGGGAGGCATGCCTGTTCGAGCGTCATTAAAAACCACTCAAGCTCTTTTGCTTGGTCATGGAAGAGGAGTATGTTTGTCATTCTCCCTTTCGAAATTCAAAGGCGGAAAGCCCCGTGTGCCCCGGCGTAGTAAGTTTTCTTTCGCTTGGAACATGAGGTGATCCTGCCACAAACCCCCAATTTTTCTAGGTTGACCTCGGATCAGGTAGGGATACCCGCTGAACTTAA
OTU 161	549	Ascomycota	Pezizomycotina	Leotiomycetes	Leotiomycetidae	Helotiales	Helotiales fam Incertae sedis	Skyttea	Skyttea sp.	Pathotroph	Lichen Parasite	Probable	Microfungus		UDB016230	SH1509701.08FU	338.1	93.78	AACGCACATTGCGCCCCCTGGTATTCCGGGGGGCATGCCTGTTCGAGCGTCATTACAACCCTCAAGCTCTGCTTGGTATTGGGCCCCGCCAGTTCTGGCGGGCCCTAAAGTCAGTGGCGGTGCCATCCGGCTCCGAGCGTAGTAATTCTTCTCGCTCTGGAGACCCGGTTGTGTGCTTGCCAGCAACCCCCAATTTTTTAAGGTTGACCTCGGATCAGGTAGGGATACCCGCTGAACTTAA
OTU 162	543	Ascomycota	Pezizomycotina	Sordariomycetes	Hypocreomycetidae	Hypocreales			Hypocreales	Saprotroph	Undefined Saprotroph	Possible	Microfungus		UDB027540	SH1546327.08FU	217.9	82.58	AACGCACATTGCGCCCGCCAGTATTCTGGCGGGCATGCCTGTCCGAGCGTCATTTCAACCCCTCAAGCCCCTGTGGCTTGGTGTTGGGGCACGACGGCCTCCCCTGGCTATCGGCCCTGAAATGAAGTGGCGGTCCCGCTAGGAACCTCTGCGTAGTAGCAACACTCGCCTAGGAACCGTGTGGTGACCACGCCGACCCCCCTATTTTTCTTAGGTTGACCTCGGATCAGGTAGGAATACCCGCTGAACTTAA
OTU 163	541	Ascomycota							Ascomycota	-	-	-	-		UDB035715	SH1546323.08FU	197.3	80.14	AACGCACATTGCGCCCGCCGGCATTCCGGCGGGCATGCCTGTTCGAGCGTCATTTCAACCCTCAAGCCCGCTTCTGCTGGGCTTGGTGTTGGGGGATCACCGGTAGGCCCTTCTCAGGGCTGATGGCGACCCCTGAAAACCAGTGGCGGTTCCGCCCGCGGCAACCTTTGCGTAGTAGCACAAACCTCGCATATGGTTCCCGGCGGTGACCAAGCCGTAAAACAAACCCATTATTTCATGAGTTGACCTCGGATCAGGTAGGAATACCCGCTGAACTTAA
OTU 164	533	Ascomycota	Pezizomycotina	Leotiomycetes	Leotiomycetidae	Helotiales	Helotiaceae	Crocicreas	Crocicreas furvum 1	Saprotroph	Undefined Saprotroph	Probable	Pezizoid		UDB003037	SH1545929.08FU			AACGCACATTGCGCCCTCTGGTATTCCGGGGGGCATGCCTGTTCGAGCGTCATTACAACCACTCAAGCTCACGCTTGGTCTTGGGGTTCGCGGTTCCGCGGCCTCTAAAATCAGTGGCGGTGCCTGTCGGCTCTACGCGTAGTAATACTCCTCGCGTTTGAGTCCGGTAGGTTTACTTGCCAGCAACCCCCAATTTTTACAGGTTGACCTCGGATCAGGTAGGGATACCCGCTGAACTTAA
OTU 165	533	Ascomycota	Pezizomycotina	Sordariomycetes	Hypocreomycetidae	Hypocreales	Clavicipitaceae	Paecilomyces	Paecilomyces sp.	Saprotroph	Undefined Saprotroph	Possible	Microfungus		UDB027778	SH1540111.08FU	417.0	97.69	AACGCACATTGCGCCCGCCAGTATTCTGGCGGGCATGCCTGTTCGAGCGTCATTTCAACCCTCAAGCTCTGCTTGGTGTTGGGGACCGGCCGCAGCCTCAGTGCTCTGCCGCCCCCTAAATACAGTGGCGGTCCCGCCGCAGCCTCCTTTGCGTAGTAGTAAACCACCTCGCACATGGAACGCAGCGTGACCACGCCGTTAAACCCCCAACTTTCTGAAGTTTGACCTCGGATCAGGTAGGAATACCCGCTGAACTTAA
OTU 166	533	Ascomycota							Ascomycota	-	-	-	-		UDB028324		178.4	80.08	AACGCACATTGCGCCCCTTGGTATTCCATGGGGCATGCCTGTTCGAGCGTCATCTACACCCTCAAGCTCTGCTTGGTGTTGGGCGTCTGTCCCGCCTTCGCGCGCGGACTCGCCCCAAATTCATTGGCAGCGGTCCTTGCCTCCTCTCGCGCAGCACAATTGCGTCTGCGGGGGGGCGTGGCCCGCGTCCACGAAGCAACATTACCGTCTTTGACCTCGGATCAGGTAGGGATACCCGCTGAACTTAA
OTU 167	530	Ascomycota							Ascomycota	-	-	-	-		UDB028275	SH1649293.08FU	187.0	80.0	AACGCACATTGCGCCCGCCGGCACTCCGGCGGGCATGCCTGTCCGAGCGTCATTTCAACCCTCAGGCCCTCCCTTCCGGGGGACGGGCCTGGTGTTGGGGCTCGGGGTCCGCAAGGCCCCCGTCCCCTAAAATCATTGGCGGTCGCGCTGTAATCCCCTGCGTAGTAACACACCTCGCTCTGGAGACCAGCACGTCCACGCCGTAAAACCCCCAATTTACCAAGGTTGACCTCGGATCAGGTAGGAATACCCGCTGAACTTAA
OTU 168	517	Ascomycota	Pezizomycotina	Dothideomycetes	Dothideomycetidae	Capnodiales			Capnodiales	-	-	-	-		UDB035710	SH1572792.08FU	228.2	84.34	AACGCACATTGCGCCCCCTGGTATTCCGGGGGGCATGCCTGTTCGAGCGTCATTTCACCACTCAAGCCTCGCTTGGTATTGGGCGCCGCGAGTCTCTCGCGCGCCTCAAAGTCTCCGGCTAGGCGGTTCGTCTCCCAGCGTTGTGGCAACTATTCGCAGAGGAGTTCGAGTCGTCGCGGCCGTTAAATCTTTCAAAGGTTGACCTCGGATCAGGTAGGGATACCCGCTGAACTTAA
OTU 169	516	Ascomycota	Pezizomycotina	Leotiomycetes	Leotiomycetidae	Helotiales	Dermateaceae	Mollisia	Mollisia dilutella 1	Pathotroph-Symbiotroph	Endophyte-Plant Pathogen	Probable	Microfungus		UDB003005	SH1545977.08FU			AACGCACATTGCGCCCTTTGGTATTCCGAAGGGCATGCCTGTTCGAGCGTCATTATAACCACTCAAGCCTTCGCTTGGTATTGGGGTTCGCGGTCTCGCGGCCCCTAAAATCAGTGGCGGTGCCTGTCGGCTCTACGCGTAGTAATACTCCTCGCGATTGAGTCCGGTGGGTAGCTTGCCAACAACCCCCAAATTTTTACAGGTTGACCTCGGATCAGGTAGGGATACCCGCTGAACTTAA
OTU 170	510	Basidiomycota	Agaricomycotina	Agaricomycetes	Agaricomycetes sbc Incertae sedis	Cantharellales	Ceratobasidiaceae	Rhizoctonia	Rhizoctonia fusispora	Saprotroph-Pathotroph-Symbiotroph	Orchid Mycorrhizal-Plant Pathogen-Wood Saprotroph	Probable	NULL		UDB031932	SH1551272.08FU	554.4	99.69	AACGCACCTTGCGCTCCTTGGTATTCCTTGGAGCATGCCTGTTTGAGTATCATGAAATTCTCAAAGCGAATCTTTCGTTAACTCGATGGACTTTGCTTTGGACTTGGAGGTCTGCGGATTCACAGTCCGCTCCTCTCAAATGCATTAGCTGGATCTCAGTGAGCTTGGTTCCACTCGGCGTGATAAGTATCACTCGCTGAGGACGCCCGTAAAAAAGGTGGCCAGGGTCGCAGGTGAACCGCTTCTAATGGTCTATTGATTTAGACAATAAATCTTTATTTAATGATCTGATCTCAAATCAGGTAGGACTACCCGCTGAACTTAA
OTU 171	502	Ascomycota	Pezizomycotina	Sordariomycetes					Sordariomycetes 1	-	-	-	-		UDB024433	SH1648729.08FU			AACGCACATTGCGCCCATTAGTATTCTATTGGGCATGCCTGTTCGAGCGTCATTTCAACCCTCAGGCTTCGGTCTGGTGCTAGGGCATTGCACTGCAAGTCCTGAAAAATAGTGGCGGACTCACTGAAATCCGAGCGTAGTAATTTCTCTTGCTATGGACTTTTGGTGATGCTCCTGCCGTAAAACCCCCCCTATATTACAAGGTTGACCTCGGATCAGGTAGGAATACCCGCTGAACTTAA
OTU 172	500	Basidiomycota	Agaricomycotina	Agaricomycetes	Agaricomycetidae	Agaricales	Psathyrellaceae		Psathyrellaceae	Saprotroph	Dung Saprotroph-Plant Saprotroph-Wood Saprotroph	Probable	Agaricoid		UDB036060	SH1566157.08FU	329.5	87.14	AACGCACCTTGCGCTCCTTGGTATTCCGAGGAGCATGCCTGTTTGAGTGTCATTAAATTCTCAACCTAACACCTGTTTTTCAATGGGTTTTGTTAGGCTTGGATATGGGGGCTTGCAGGTCCGCTCTTTTGTGGTCTGCTCCTCTGAAATGCATTAGTGGGTTTGTGCCCCTCATCTATTGGTGTGATAATTATCTACGCCGTGGGTGATGGATTGGCCATCAATGAACCTGCTCATAACCGTCCGTCTCGGACAACTTTGATCATTTTGACCTCAAATCAGGTAAGACTACCCGCTGAACTTAA
OTU 173	489	Basidiomycota	Agaricomycotina	Agaricomycetes	Agaricomycetes sbc Incertae sedis	Polyporales	Ganodermataceae	Ganoderma	Ganoderma applanatum	Pathotroph-Saprotroph	Plant Pathogen-Wood Saprotroph	Probable	Polyporoid		UDB036203	SH1555630.08FU	496.0	100.0	AACGCACCTTGCGCTCCTTGGTATTCCGAGGAGCATGCCTGTTTGAGTGTCATGAAATCTTCAACCTATAAGCTTTTGTGGTTTGTAGGCTTGGACTTGGAGGCTTGTCGGCCTTGATCGGTCGGCTCCTCTTAAATGCATTAGCTTGATTCCTTGCGGATCGGCTCTCGGTGTGATAATATCTACGCCGCGACCGTGAAGCGTTTGGCGAGCTTCTAACCGTCTCACTTGAGAGACAACTTTATGACCTCTGACCTCAAATCAGGTAGGACTACCCGCTGAACTTAA
OTU 174	489	Ascomycota							Ascomycota	-	-	-	-		UDB035715	SH1546323.08FU	192.1	79.79	AACGCACATTGCGCCCGCCGGCATTCCGGCGGGCATGCCTGTTCGAGCGTCATTTCAACCCTCAAGCCCTCTTCAATGTTGGGCTTGGTGTTGGGGGATCGCTTACGGCGCCTCTGGGTGCCTGAGCGACCCCTGAAAACTAGTGGCGGTTCCGCCCGCGGCAGCCTTTGCGTAGTAGCACAAACCTCGCATATGGAGCCCGGCGGTAGCCTTGCCGTTAAACACCCAAACTTTATTCATGAGTTGACCTCGGATCAGGTAGGAATACCCGCTGAACTTAA
OTU 175	467	Ascomycota	Pezizomycotina	Dothideomycetes	Pleosporomycetidae	Pleosporales	Leptosphaeriaceae		Leptosphaeriaceae	Pathotroph-Saprotroph	Plant Pathogen-Wood Saprotroph	Probable	Microfungus		UDB025129	SH1635394.08FU	248.8	85.27	AACGCACATTGCGCCCCTTGGTATTCCATGGGGCATGCCTGTTCGAGCGTCATTTGTACCTTCAAGCTATGCTTGGTGTTGGGTGTTTGTCCTCTCCCCTGCGTTTGGACTCGCCTTAAAGTCATTGGCAGCCTGTATACTGGTTTTGAGCGCAGCACATTTTGCGTCTTGCATCTAGTAATACTAGCATCCATCAAGCCCTTTATCACTTTTGACCTCGGATCAGGTAGGGATACCCGCTGAACTTAA
OTU 176	464	Ascomycota							Ascomycota	-	-	-	-		UDB028324		199.0	81.82	AACGCACATTGCGCCCTTCGGTATTCCGTTGGGCATGCCTGTTCGAGCGTCATTTGACCCTTCAAGCTCTGCTTGGTGTTGGGCGTTTGTTCCGCCTCCGCGCGTGGACTCGCCTCAAATTCATTGGCAGCCGGCAAGTTGGCTTCGTGCGCAGCACATTGCGTCACGGCTCCAGTCTGCCTCCGTCCAGTAAGGCTCCTCATCACTTTGACCTCGGATCAGGTAGGGATACCCGCTGAACTTAA
OTU 177	463	Basidiomycota							Basidiomycota	-	-	-	-		UDB018824	SH1505693.08FU	123.5	81.37	AACGCACCTTGCGCTCCTTGGTATTCCGAGGAGCATGCCTGTTTGAGTGTCATGAAAACCCTCAACCTTAGATTGGTTATTTGACCTTTCTTTGGCTTGGATTTGGACGTTTGCCGATGATAAGTCGGCTCGTCTTAAAAGTAATAGCTGGATCTGTCTCGCGACATGGTTTGACTTGGCGTAATAAGTATTTCGCTAAGGACATCTTCGGATGGCCCTGTTGCAGACTAAAGACCGCTTTCTAATCCATTGATCTTCGGATTAATATTCATAACATCTGGCCTCAAATCAGGTAGGACTACCCGCTGAACTTAA
OTU 178	454	Ascomycota	Pezizomycotina	Leotiomycetes	Leotiomycetidae	Helotiales	Helotiaceae		Helotiaceae	Saprotroph-Symbiotroph	Ectomycorrhizal-Fungal Parasite-Plant Pathogen-Wood Saprotroph	Probable	Microfungus		UDB028187	SH1523754.08FU	264.2	87.65	AACGCACATTGCGCCCCTTGGTATTCCGAGGGGCATGCCTGTTCGAGCGTCATTATGACCAATCACGCCCTGTGCGTGGACTTGGGGTTCGCGATTCCGCGTCCCTTAAAATCAGTGGCGGTGCCGTTGGGCTCTAAGCGTAGTAATTCTTCTCGCTACAGGGTCTTGCGGTTGCTTGCCACAACCCCAACTTTCTTAGGTTGACCTCGGATCAGGTAGGGATACCCGCTGAACTTAA
OTU 179	453	Ascomycota	Pezizomycotina	Sordariomycetes	Xylariomycetidae	Xylariales	Xylariaceae	Xylaria	Xylaria oxyacanthae 1	Saprotroph-Symbiotroph	Endophyte-Undefined Saprotroph-Wood Saprotroph	Probable	Xylarioid		UDB024303	SH1541127.08FU			AACGCACATTGCGCCCGCTAGTATTCTGGCGGGCATGCCTGTTCGAGCGTCATTGCAACCCTCAGGCCCAGCCTGGCGTTGGAGGACTGCGCTGCAGCCTCCCAAAGCAAGCGGCGGCGGCGCCCCAAAACCGAACGCAGTAGTTACTTCTCGTTCTGGGTGTGGGACGTTGACCTGCCGGAAAACCCCATCTTTTTAGTGGTTGACCTCGAATCAGGTAGGAATACCCGCTGAACTTAA
OTU 180	449	Basidiomycota							Basidiomycota	-	-	-	-		UDB016422	SH1561857.08FU	128.6	74.52	AACGCACCTTGCACCCTTTGGTATTCCGAAGGGTACGCCCGTTTGAGTGTCATTGTAATCTCACTTCTACAACTTTATTGTTGTTTGAATGTGGACTTGGATGTTGCCGTTTTATCACGGCTCGTCTTAAATGCCTGAGTGTACCCTGTTTTGCAGCGTATCCAGTGTAATAAACATTTCACTAGAGTTGGTCGAAAGACCGCGTTGACTATATGGGCTCTATGCTTCAAACCGTCTGCCATGTGGACAATTTCTTGACAATTTGACCTCAAATCGGGTGGGACTACCCGCTGAACTTAA
OTU 181	445	Ascomycota							Ascomycota	-	-	-	-		UDB028275	SH1649293.08FU	181.8	79.35	AACGCACATTGCGCCCGCCAGCACTCTGGCGGGCATGCCTGTTCGAGCGTCATTTCAACCCTCGGACCCCCTAGGCCTCGCGCCCCGGGGGACCGGTGTTGGGGCTCGGGCTCCCCCAGCGGGCGCCCGTCCCCTAAATCCAGTGGCGGTCGCGACCCGGCAGCCCCGCGTAGTAGCACACCTCGCGGGACGCGCCGGCCGTGGCCACGCCGTAAAACCACCCACACTCAAGGTTGACCTCGGATCAGGTAGGAATACCCGCTGAACTTAA
OTU 182	443	Mortierellomycota	Mortierellomycotina	Mortierellomycetes	Mortierellomycetes	Mortierellales			Mortierellales	-	-	-	-		UDB028005	SH1557019.08FU	305.4	83.48	AACGCATATTGCGCTCTCTGGTATTCCGGAGAGCATGCTTGTTTGAGTATCAGTAAACACCTCAACTCCCTTTCTTCTTGAAATGGAGCTGGACTTGAGTGATCCCAACGCTTTATTCATAAAGTGGCGGGTTACTTGAAATGCAGGTGCAGCTGGACTTTTCTCTGAGCTATAAGCATATCTATTTAGTCTGCCTCAAAACAGATTATTACCTTTGCTGCAGCTAACATAAAGGAGATTAGTTCTTGTGCTGACTGATGCAGGATTCACAAAGACCGCTTCGGCTGTCTTTGTAAACTCGATCTCAAATCAAGTAAGACTACCCGCTGAACTTAA
OTU 183	440	Basidiomycota	Agaricomycotina	Agaricomycetes	Agaricomycetidae	Boletales	Boletaceae	Xerocomellus	Xerocomellus sp. 1	Symbiotroph	Ectomycorrhizal	Highly Probable	Boletoid	Putative long-distance a	UDB032512	SH1547236.08FU			AACGCACATTGCGCTCCCTGGTATTCCGGAGAGCATGCCTGTTTGAGAATCAGTAAAATCTTCAACTTCTATGTTTGATGGCTTTCGGGCCAAAAAACATAAAAGGTGAGATCTGGGTCGTTTGCCTTTGCGGCAATGACTTTAATTGCAACGTCTCAGAACCAATGACTGAAATGTCTTGGGCAAACGCATGAATGAGGCAACTCACAAGTACGTCTGTTCCTTTTGACAGGGATGTTTTGGTGCTGAGACTCAACTGATTAACCAAAGTTGGGTTGCGGTAGCAGCTTTTCTTTGAACACTTGGTCTCAAATCAGGTAGGAAAACCCGCTGAACTTAA
OTU 184	434	Basidiomycota	Agaricomycotina	Agaricomycetes	Agaricomycetidae	Agaricales	Agaricaceae	Micropsalliota	Micropsalliota sp. 1	Saprotroph	Undefined Saprotroph	Probable	NULL		UDB032515	SH1547428.08FU			AACGCACATTGCACTCTGTTTACGCAGAGTATGCCTGTTTGAGAATCTATAGTATTCTTTTTCTCTATAAAATTTTTAATTTTATATGGGAAAGTTTTGCGGATTTTGGGTTATTAAAAAAACCCAATTCTGTTAAATCTATAGTCATTTTTTTTATAGTCAATGTTTGAACTCTCTATAAAAACTTTGCAGAAATGTATTTGAATGAACCTACCAGTTCTCCTTATACAAATTACGCAGAGAGAGATTAGTTTTCTATAAAAGATAATGCCCATAACCATTAAAAAAGTAGATCGTTAGATTTATTTTTTGAACCATGGTCTCAAATCAGGTAGGATTACCCGCTGAACTTAA
OTU 185	432	Ascomycota	Pezizomycotina	Leotiomycetes	Leotiomycetidae	Helotiales	Hyaloscyphaceae	Pezizella	Pezizella sp.	Pathotroph-Saprotroph-Symbiotroph	Bryophyte Parasite-Lichen Parasite-Ectomycorrhizal-Ericoid Mycorrhizal-Undefined Saprotroph	Possible	Microfungus		UDB019834	SH1648851.08FU	259.1	90.48	AACGCACATTGCGCCCCTTGGTATTCCGAGGGGCATGCCTATTCGAGCGTCATTATCACCCCTCAAGCCTAGCTTGGTGTTGAGGCCTGCTGTGAAGGCAGCCTCTAAAATCAGTGGCAGTGCTGTCAAGCTCTAAGCGTAGTAAATTTCTCGCTATAGGGTCTTGGTGGACACTCGCCAGAACCCCCCATTTTTTAATGATTGACCTCGGATTAGGTAGGGATACCCGCTGAACTTAA
OTU 186	429	Glomeromycota	Glomeromycotina	Glomeromycetes		Paraglomerales	Paraglomeraceae	Paraglomus	Paraglomus sp. 5	Symbiotroph	Arbuscular Mycorrhizal	Highly Probable	NULL						AACGCAAATTGCGCCTTCTTTCGGAAGGCATGTCTGTTTGAGGGCACCATTTAACAAATAATGTGCGCGTCGTTTACGGACGACGTGCGCACGTTGATGAGCTTTTCCGAAAAAACCAGGTTTTTTTGGTGGCGCATAATGAACAGCGTGGGCTTTTTCTTCGATTCTCGTGTAGTAAATCTTCAACGCTTGGGTTGAGAAAAAGTGCGTGCCGCGCAATGGGTGTGGCGAATTTACCCCTGCCCCAATGCCACTCTTTCCCTGCGAAAGAACAATCTTTTATTCAGGGCCTCAAATCAGACAAGAGTACCCGCTGAACTTAA
OTU 187	424	Ascomycota	Pezizomycotina	Pezizomycetes	Pezizomycetidae	Pezizales	Pezizaceae	Peziza	Peziza ostracoderma	Saprotroph-Symbiotroph	Dung Saprotroph-Ectomycorrhizal-Litter Saprotroph-Undefined Saprotroph	Possible	Pezizoid		UDB032976	SH1630799.08FU	465.1	99.28	AACGCACATTGCGCCCTATGGTATTCCATAGGGCATACCTGTTTGAGCGTTAGCTCCCCATATTCTCAAGCATTATTTTGTAATGCTTGGATTTGTTTGGAGAGGCACCTCTATCATAGAGGTACCCTTCAGAAATGTATATGGCAGTATAGTTTATATCTGAACCAGGCGTAATAATAATAAAGTCGCTGAGTTTACCATATTTATACTTGCCTGAACCCACCCATTGTTAAATCGGGTAACCTCAAATCAGGTAGGGATACCCGCTGAACTTAA
OTU 188	424	Ascomycota	Pezizomycotina	Sordariomycetes	Hypocreomycetidae	Hypocreales	Nectriaceae		Nectriaceae	Saprotroph	Undefined Saprotroph	Possible	Microfungus		UDB035664	SH1546322.08FU	269.4	86.36	AACGCACATTGCGCCCGCCAGTATTCTGGCGGGCATGCCTGTTCGAGCGTCATTTCAACCCTCAAGCTCTGCTTGGCGTTGGGGATCGGCATCCCGGCTTCGTGCCGCGCCGTCCCCCAAATACAGTGGCGGTCACGCTGCAGCTTCCTTTGCGTAGTAGCACACCTCGCACCGGAGAGCAGCGCGGCCACGCCGTAAAACCCCCGACTTCTTGTTTTTGACCTCGAATCAGGTAGGACTACCCGCTGAACTTAA
OTU 189	422	Basidiomycota	Agaricomycotina	Tremellomycetes	Tremellomycetes sbc Incertae sedis	Cystofilobasidiales	Mrakiaceae	Itersonilia	Itersonilia sp.	Pathotroph	Litter Saprotroph-Plant Pathogen	Probable	Yeast-Microfungus		UDB028113	SH1556067.08FU	559.5	99.7	AACGCACCTTGCGCTCCTTGGTATTCCGAGGAGCATGCCTGTTTGAGTGTCATGAAACCCTCAACCTCTGACTTTCTTAATCGTCGGTCAGCGGCTTGGACTTGGGTGTCTGCCGGTCTTCATTGATCGGCTCACCTGAAATATATTAGCGAATCCCTTCTGTAATCGGTTCCACTCGACGTGATAAGTATTTCGTCGAGGACATCTTTATTGATGGCCGAGATAAAGCTGGTTCTAGATCTGCTTCTAACTCTTTCGTTGCCTTCTGGTAAAGAAAAACCCCTCATGATCTGGCCTCAAATCAGGTAGGACTACCCGCTGAACTTAA
OTU 190	418								Fungi	-	-	-	-		UDB024118	SH1516552.08FU	346.6	88.78	AACGCACCTTGCGCCCTTTGGTATTCCGAAGGGCACACCTGTTTGAGTGTCATTAATTTCTCAACCCTATCATTTTTTAATCAAATTGTTAGTGTTTGGATGTTGAGTGTTGTTGGACTTTTAGTTCAACTCGCTTTAAATTTATGAGCAGGCTCTTACAATTTCGGACTGACTCAATGTGATAAGAAATTTCATTGAGGATGCCTTACGGCAGCCGAATTGTTGGGAAATGCCGCTACTAGTTGACCCTTATATTTTTAGACCTCAAATCAGGTGGGACTACCCGCTGAACTTAA
OTU 191	413	Ascomycota							Ascomycota	-	-	-	-		UDB024264		109.7	73.81	AACGCACATTGCGCCTTCCAGTATCCTGGGAGGCATGCCTGTCCGAGCGTCGTTTCAACCCTCGAGCCCCCGTGGCCCGGTGTTGGGGACGCTGCCCAGCTACCTGGGCAGCCCCCCTAAATGCAGTGGCGGTCCCGCAAGTCCCAGCCCTTTGCGTAGTAATATCATTCTCGCTCTGGACGGCTCGCGGGCTTACCAGCCTCGAAACCCCCTACAAAGACCGCCCCGGCGGCAACGGTTGACCTCGGATCAGGTAGGAATACCCGCTGAACTTAA
OTU 192	408	Ascomycota	Pezizomycotina	Leotiomycetes	Leotiomycetidae	Helotiales	Helotiales fam Incertae sedis	Cadophora	Cadophora sp.	Symbiotroph	Endophyte	Highly Probable	Microfungus		UDB027531	SH1523753.08FU	367.2	96.25	AACGCACATTGCGCCCCTTGGTATTCCGAGGGGCATGCCTGTTCGAGCGTCATTATAACCACTCAAGCCTCGGCTTGGTCTTGGGGTTCGCGGTCTCGCGGCCCTTAAAATCAGTGGCGGTGCCGTCTGGCTCTAAGCGTAGTAATTTTCTCGCTATAGGGTCCAGGTGACCACCTGCCATAACCCCCCATTCTTTACGGTTGACCTCGGATCAGGTAGGGATACCCGCTGAACTTAA
OTU 193	406	Ascomycota	Pezizomycotina	Leotiomycetes	Leotiomycetidae	Helotiales	Hyaloscyphaceae		Hyaloscyphaceae	Saprotroph	Plant Saprotroph-Wood Saprotroph	Probable	Microfungus		UDB019834	SH1648851.08FU	252.2	89.3	AACGCACATTGCGCCCCTTGGTATTCCGAGGGGCATGCCTATTCGAGCGTCATTATCACCCCTCAAGCTCAGCTTGGTGTTGGGGCCTGCCATCACGGCAGCCCCTAAAATCAGTGGCGGTGCCCTCAGGCTCTAAGCGCAGTAATTTCTCTCGCTACAGACCCCTGGAGGCGCCCGCCAGCAACCCCCCATTTTTTTAATGATTGACCTCGGATTAGGTAGGGATACCCGCTGAACTTAA
OTU 194	406	Basidiomycota	Agaricomycotina	Tremellomycetes		Trichosporonales	Trichosporonaceae	Asterotremella	Asterotremella sp.	Saprotroph-Pathotroph	Fungal Parasite-Soil Saprotroph	Probable	Yeast		UDB027341	SH1514262.08FU	329.5	91.15	AACGCAACTTGCGCTCTCTGGTATTCCGGAGAGCATGCCTGTTTGAGTGTCATGAAATCTCAACCATTAGGGTTTCTTAATGGCTTGGATTTGGGTGTTGCCAGTCTCTGGCTCGCCTTAAAGGAGTTAGCGAGTTTAACAATGTCGTCTGGCGTAATAAGTTTCGCTGGTAAGACTTGTGAAGTTTGCTTCTAATCGTCTTCGGACAATTACTTTGACTCTGGCCTCAAATCAGGTAGGACTACCCGCTGAACTTAA
OTU 195	397	Basidiomycota	Pucciniomycotina	Microbotryomycetes	Microbotryomycetes sbc Incertae sedis	Sporidiobolales	Sporidiobolaceae	Rhodotorula	Rhodotorula sp.	Pathotroph-Saprotroph	Animal Endosymbiont-Animal Pathogen-Endophyte-Plant Pathogen-Undefined Saprotroph	Probable	Yeast		UDB027748	SH1558726.08FU	394.7	91.05	AACGCACCTTGCGCTCCTTGGTATTCCGAGGAGCATGCCTGTTTGAGTGTCATGAAATCTTCAACCCACCTCTTTCTTAGTGAATCGGGTGGTGCTTGGTTTCTGAGCGCTGCTCTGCTTCGGCTCAGCTCGTTCGTAATGCATTAGCATCCGCAACCGAACTTCGGATTGACTTGGCGTAATAGACTATTCGCTGAGGATTCTAGTCTTCTGGACTAGAGCCGGGTTGGGTTAAAGGAAGCTTCTAATCCTAAAGTCTAATTTTTGATTAGATCTCAAATCAGGTAGGACTACCCGCTGAACTTAA
OTU 196	391	Ascomycota	Pezizomycotina	Sordariomycetes					Sordariomycetes 1	-	-	-	-		UDB024433	SH1648729.08FU			AACGCACATTGCGCCCACTAGTATTCTGGTGGGCATGCCTGTTCGAGCGTCATTTCAACCCTCAAGCCTGGCTTGGTGTTGGGGCTCTGCGTCTGCAGTCCCTTAAATCCAGTGGCGGACACGCTAGGTCTCCGAGCGCAGTAGTTTCTTCTCGCTCAGGACGGCCGGCGTGGGCTTGCCTCGCACCCATCTTATCAAGGTTGACCTCGGATCAGGTAGGAATACCCGCTGAACTTAA
OTU 197	389	Basidiomycota	Agaricomycotina	Agaricomycetes	Agaricomycetes sbc Incertae sedis	Polyporales	Fomitopsidaceae	Amylocystis	Amylocystis lapponica 1	Saprotroph	Wood Saprotroph	Highly Probable	Polyporoid		UDB034944	SH1510121.08FU			AACGCACATTGCACTCTATTTCGGTAGAGTATGCCTGTTTGAGAATCTAATGTATTCTTTTTCCTATATATAATTTTATTTTATATATAGGAAAGATTTGTGGAATCTCTAAGCTTTTTTTTAGAGTTCTATTAATTACATAGCTTGGTAATTAATCTTGGCTGAAAAGTATTTGAATGGAACTTTTTCGTTTCTCCCTATACAGAATAAGCTGTTTAATAAAATCCAAGTTCTCAAAACCTATGAAAAAGTTTTTATGAATAACCAAACTTTGATGTAAAAAATCAATTGTTTGATGAAAATAATCTTTTTGAACCATGGTCTCAAATCAGGCAGGATTACCCGCTGAACTTAA
OTU 198	389	Basidiomycota	Agaricomycotina	Agaricomycetes	Agaricomycetes sbc Incertae sedis	Auriculariales			Auriculariales	-	-	-	-		UDB014156	SH1560213.08FU	302.0	88.43	AACGCATCTTGCGCTCCTTGGTATTCCATGGAGCATGCCTGTTTGAGTGTCACGTAAACCCTCACACCAGTGATGTCAAAGTCTCTGGAGGTGGAATTGGACTGTGCCGTAGTTGGCTCGTCCTGAAATTCATTAGCCTGCGCTTTGTTAGCGTGCTCGGCATGGTGTGATAATTATCTGCGCCGTCGCCTTAGGCCGCTTCTTTAATGTGCTGCTTCTAATCGTCCCTTGTGGACAGACACTATAAAGCTTTGGCCTCAAATCAGGTAGGACTACCCGCTGAACTTAA
OTU 199	388	Basidiomycota							Basidiomycota	-	-	-	-		UDB038058	SH1556364.08FU	176.7	78.11	AACGCATCTTGCGCTCTCTGGTATTCCGGAGAGCATGCCTGTTTGAGTGTCATGAATCTCTCAAATACAAAAACTTTATTGTTTTTGTGTTTGGACTTGGAAGCTGTCGGCGCAAGTCGACTCTTCTTAAATGCATTAGCTGGGGTTTATATAGTGGATCCTTGGTGTGATAATTATCTACGCCTTGAAGTCCCTGTAGACCTTGCTTCAAACCGTCTTACTACGAGACAATTTTGAATCATCTGGCCTCAAATCAGGTAGGACTACCCGCTGAACTTAA
OTU 200	380	Basidiomycota	Agaricomycotina	Agaricomycetes	Agaricomycetidae	Boletales	Paxillaceae	Paxillus	Paxillus ammoniavirescens 1	Symbiotroph	Ectomycorrhizal	Highly Probable	Agaricoid	Long-distance a, f	UDB023999	SH1569017.08FU			AACGCACCTTGCGCTCCTTGGTATTCCGAGGAGCATGCCTGTTTGAGTGTCATTTAATTCTCAACCATCCCTCGATTTGTTTCGAGGTTTGGCTTGGATTTTGGGAGCTGCCGGGCGACCCTACGGTCTTCGGCTCTCCTTAAAAGCATTAGCGATGGTGGAACGACCTAACTCCATGCATGAACGGCCTTCGACGTGATAATGATCGTCGTGGCTGGAGTGCTAGCGGGCGTCGTGAAGCCAGCGCTTCTAAATCTCTCGTCGAAAGACGAAACTCGAAACTTGACCTCAAATCAGGTAGGACTACCCGCTGAACTTAA
OTU 201	379	Ascomycota	Pezizomycotina	Sordariomycetes					Sordariomycetes 1	-	-	-	-		UDB024433	SH1648729.08FU			AACGCACATTGCGCCCGCCAGTATTCTGGCGGGCATGCCTGTCCGAGCGTCATTTCAACCATCAAGCCCCGTGCTTGTGTTGGGGACCTGCGTCCGACCGCAGGCCCTGAAAACCAGTGGCGGGCTCGCTGTCCACACCGAGCGTAGTAACTAACCTCGCTCCGGAGTGGCGCGGGCGCCTGCCGTAAAACCCCCAATTTATCAAGGTTGACCTCGGATCAGGTAGGAATACCCGCTGAACTTAA
OTU 202	371	Basidiomycota	Agaricomycotina	Agaricomycetes	Agaricomycetes sbc Incertae sedis	Cantharellales	Ceratobasidiaceae	Ceratobasidium	Ceratobasidium sp.	Pathotroph-Saprotroph-Symbiotroph	Endomycorrhizal-Plant Pathogen-Undefined Saprotroph	Possible	Microfungus		UDB028157	SH1608945.08FU	487.4	95.43	AACGCACCTTGCGCTCCTTGGTATTCCTTGGAGCATGCCTGTTTGAGTATCATGAAATTCTCAAAGTAAACCTTTTGTTAATTCAACTGGTCTTTGCTTTGGATTTGGAGGCCTTTGCAGATGTCACAGTCTGCTCCTCTTAAATAAATTAGCTGGATCTCAGTATACACTTGGTTCCACTCGGCGTGATAAGTATCACTCGCTGAGGACACTGTTAAAAAGGTGGCCAGGCAATGCAGATGAACCGCTTCTAATAGTCCATTGACTTGGACAAATTAAAAATTTATGATCTGATCTCAAATCAGGTAGGACTACCCGCTGAACTTAA
OTU 203	370	Ascomycota	Pezizomycotina	Sordariomycetes	Hypocreomycetidae	Hypocreales	Hypocreaceae		Hypocreaceae	Saprotroph	Undefined Saprotroph	Possible	Microfungus		UDB011025	SH1567967.08FU	253.9	85.02	AACGCACATTGCGCCCGCCGGCACTCCGGCGGGCATGCCTGTCCGAGCGTCATTTCAACCCTCGGGACCCCTTCAGGGGACCCGGTGTTGGGGATCAGGGTCCTTCGGGCCCCTGCCCCCTAAATACAGTGGCGGTCGCGCCGCAGCCTCCCCTGCGTAGTAATGCACATCGCACCGGAGAGCGGCACGGCCACGCCGTAAAACCCCCCAATTTTACAAGGTTGACCTCGGATCAGGTAGGAATACCCGCTGAACTTAA
OTU 204	366	Ascomycota	Pezizomycotina	Dothideomycetes	Pleosporomycetidae	Pleosporales			Pleosporales	-	-	-	-		UDB028324		204.1	82.21	AACGCACATTGCGCCCCTTGGTATTCCATGGGGCATGCCTGTTCGAGCGTCATTTTGTACCCTCAAGCACTGCTTGGTGTTGGGCGTTTGTCCTGCAAAGGACTCGCCTGAAAGCGATTGGCGGCCAACGTACTGGTGGTAGAGCGCAGCACAATTTGCGTCTCTCCCTTCTACGTCGGCGTCCATGAAGCCTTATTCAAACGTTTGACCTCGGATCAGGTAGGGATACCCGCTGAACTTAA
OTU 205	365	Basidiomycota	Agaricomycotina	Agaricomycetes	Agaricomycetes sbc Incertae sedis	Auriculariales			Auriculariales	-	-	-	-		UDB013976	SH1611547.08FU	252.2	80.69	AACGCACCTTGCGCCGCTCGGTTTTCCGAGGGGCACGTCTGTTTGAGTGTCACGTCAAACTCTCACTTCCCTTCGGGTGAAGTGGAATTGGACCGTGCTGTCGACCCCTCGGGGTCGTACGGCTCGTCCCGAAATGCATGGTTTGCCTGCAGAGTCTTGCGCGAGCGGGACCGACGAAACGGTGTGATATTTACTATCTGCGCTGTAAGTAGTCGGACTCCAGCCTGCTGCACCAGGAGCGCTCTGGGCTTACAATGGCGAGGGTGAGGGAATTCGCGTTCCCTGTGCCCCCATTACTCTTGTGTTTGACCTCAAATCAGACGGGACTACCCGCTGAACTTAA
OTU 206	365	Ascomycota	Pezizomycotina	Pezizomycetes	Pezizomycetidae	Pezizales	Pezizaceae	Peziza	Peziza sp.	Saprotroph-Symbiotroph	Dung Saprotroph-Ectomycorrhizal-Litter Saprotroph-Undefined Saprotroph	Possible	Pezizoid		UDB032975	SH1630803.08FU	430.8	96.75	AACGCACATTGCGCCCTATGGTATTCCATTGGGCATACCTGTTTGAGCGTTAGCTCCCCATATTCTCAGGCATTATTCTGTAATGTTTGGATTTGTTTGGAGAGGCACCTCTGTCATGGAGGTACCCTCCAGAAATGTATATGGCAGTATAGTTTATATCTGAACTAGGCGTAATAATAATAAAGTCGCGGAGTTCACAATATTTATACTTGCCTGAACCCACCCATTTGTTAAATAGGGTAACCTCAAATCAGGTAGGGATACCCGCTGAACTTAA
OTU 207	361	Ascomycota							Ascomycota	-	-	-	-		UDB031063	SH1523025.08FU	159.5	78.74	AACGCACATTGCGCCCCCTGGTATTCCGGGGGGCACGCCTGTTCGAGCGCCATTTCAACCCTCAAGCCTAGCTTGGTGATGGGCCACACCCCGCAGGGGCGGGCCCGAAACTCGTAGGGCGCTGTCCGCCGGCTCTGAGCGTAGCAAGAGAAATCCCTCGCTCCGGATGTCCGTCGGGTGGCCGCCTCGAAAACCCACGAAATATTACAAGGTTGGCCTCGGATCAGGCGGGGATACCCGCTGAACTTAA
OTU 208	361	Ascomycota							Ascomycota	-	-	-	-		UDB028324		137.2	76.95	AACGCACATTGCGCCCCTTGGTATTCCATTGGGCATGCCTGTTCGAGCGTCATTTAACCCCTCAAGCTCTGCTTGGTGTTGGGCGTTTTGTCTACGGACTCGCCCCAAATCTATTGGCAGCAGCCTTACCAGCTTCTTGCGCAGTACAATGTGCTTTAAGAAGCTTGTGTAGTGGTGTGCAACCCAGTAAGTAACTCTTTATTTTGACCTCGAATCAGGTAGGGATACCCGCTGAACTTAA
OTU 209	359	Basidiomycota	Agaricomycotina	Agaricomycetes	Agaricomycetes sbc Incertae sedis	Cantharellales	Cantharellales fam Incertae sedis	Sistotrema	Sistotrema sp.	Saprotroph-Symbiotroph	Ectomycorrhizal-Wood Saprotroph	Possible	Corticioid		UDB028054	SH1506094.08FU	466.8	94.46	AACGCACCTTGCGCTCCTTGGTATTCCGAGGAGCACGCCTGTTCGAGTGTCATGAAGCTCTCAAGCGATAATAACTTTATTGTTGTTATTTAGCTTGGATTTGGGACCTGCTGTGTTACAACGGCTGTCCCTAAATGTATTAGCCGGCTCTAATGGAAGACTAGGTTCTTACTCGGTGTGATAATTATCTTACGCTGAGGACATTTCTCTTGTAAAAGGGAGAGATGGCCAAGACTACTTTTAGGCTGCTTCTAATCGTCTCTTCTGACAAACAAATTATTCAAATCTGACCTCGAATCAGGTGGGACTACCCGCTGAACTTAA
OTU 210	358	Ascomycota							Ascomycota	-	-	-	-		UDB028052	SH1627155.08FU	188.7	85.71	AACGCACATTGCGCCCTTTGGCATTCCGAAGGGCATGCCCGTTCGAGCGTCATTACACCAATCAAGCCTGGCTTGGTATTGGGCGTCGGGGACCCTCCCCCGCGCCCCCAATTCGTCGGCTGGACGGTTCGAATCTCAGCGTTGTGGTCAATCAATTCGCTGGCGACGACGACCGGACGCGCCGTTAAACCTCACTACAGGTTGACCTCGGATCGGGTAGGGATACCCGCTGAACTTAA
OTU 211	354	Basidiomycota	Pucciniomycotina	Microbotryomycetes	Microbotryomycetes sbc Incertae sedis	Microbotryales	Microbotryaceae	Microbotryum	Microbotryum lychnidis-dioicae 1	Pathotroph	Plant Pathogen	Probable	NULL		UDB031415	SH1572255.08FU			AACGCATCTTGCGCTCGCTGGTATTCCGGCGAGCATGTCTGTTTGAGTGTCGTGAAATCTTCAACCCTTTAATTTTTTTATAATGAGAATTTTAATGTGGTTTGGTTTTTGAATATTGCTGGAATCTTTTGAGATTCGTTAGCTTATTCGTAATTTATTAGCATTTCAAATTTTGAGATCAGATTGACTCGGCGTAATAGATTATTCGCTGAGGATATGTTTTTTTTGTTGTGAAAAACATAGCTGAACTTTTGAGTTAAAAAGAAAGCTTCTAATCCTTTTTATTTTTTTTAAAAAAAATCTTTTTAATTAGACCTCAGATCAGGCAGGATTACCCGCTGAACTTAA
OTU 212	349	Basidiomycota	Agaricomycotina	Tremellomycetes	Tremellomycetes sbc Incertae sedis	Tremellales	Bulleribasidiaceae	Dioszegia	Dioszegia sp.	Pathotroph-Saprotroph-Symbiotroph	Fungal Parasite-Undefined Saprotroph	Possible	Tremelloid-Yeast		UDB025726	SH1609776.08FU	295.1	92.34	AACGCAGATTGCGCCCTTTGGTATTCCGAAGGGCATGCCTGTTTGAGTGTCTTATAAACCTCACCTCTATAGTTTTCTATAGTTGTGCTTTGGGTGTTGCCGTTTACTCTGGCTCGCCTTAAATGTCTAAGTGGAATGCGTAATAAGTTCTCGCAACCCTCCACTCTAACACACTTTATATTCTGACCTCAAATCAGGTAGGACTACCCGCTGAACTTAA
OTU 213	348	Ascomycota	Pezizomycotina	Sordariomycetes					Sordariomycetes 1	-	-	-	-		UDB024433	SH1648729.08FU			AACGCACATTGCGCCCGCCGGTATTCTGGCGGGCATGCCTGTTCGAGCGTCATTTCAACCATCAAGCCCCAGGCTTGTGTTGGAGCCCTGCGGCCGCCCGCAGCCTCCTAAAAGCAGTGGCGGGCTCGCTATCACACCGAGTGCAGTAGTTTACTCTTCGCTCTGGACGTGTAGCGGGTTCCAGCCGTGAAACCCCCTATATTTCAAAGGTTGACCTCGGATCAGGTAGGAATACCCGCTGAACTTAA
OTU 214	345	Ascomycota	Pezizomycotina	Pezizomycetes	Pezizomycetidae	Pezizales	Pyronemataceae		Pyronemataceae	Saprotroph-Symbiotroph	Dung Saprotroph-Ectomycorrhizal-Soil Saprotroph-Wood Saprotroph	Possible	Gasteroid-Pezizoid		UDB025652	SH1621899.08FU	255.6	85.07	AACGCACATTGCGCCTTCCGGTATTCCGGAAGGCATGCCTGTTCGAGCGTCATAAAAACCCTCAAGCTTGAATCCATTCATGTCTTGGTATTGGTATTGGGGTGGACTTGGGCCATTCCTATCCGAAAATCAATGGCGAGTTTGTCTGTACCGATAAGTGTAGTAATTGACATTATGTTTCACTATTGTACGGTTCATGTTTTGCCGTTAACCCTCACTTCAAGTGTTTGACCTCGGATCAGGTAGGGATACCCGCTGAACTTAA
OTU 215	344	Ascomycota	Pezizomycotina	Leotiomycetes	Leotiomycetidae	Helotiales	Helotiaceae		Helotiaceae	Saprotroph-Symbiotroph	Ectomycorrhizal-Fungal Parasite-Plant Pathogen-Wood Saprotroph	Probable	Microfungus		UDB028187	SH1523754.08FU	271.1	88.11	AACGCACATTGCGCCCCTTGGTATTCCGAGGGGCATGCCTGTTCGAGCGTCATTATAACCAATCACGCCCTGTGCGTGGACTTGGGGTTCGCGGTCTCGCGTCCCTTAAAGTTAGTGGCGGTGCTGTTAGGCTCTAAGCGTAGTAATTCTTCTCGCTATAGGGTCTTGCGGTTACTTGCCATAACCCCAACTTTCTTAGGTTGACCTCGGATCAGGTAGGGATACCCGCTGAACTTAA
OTU 216	343	Ascomycota	Pezizomycotina	Sordariomycetes	Hypocreomycetidae	Hypocreales	Nectriaceae	Fusarium	Fusarium sp.	Pathotroph-Saprotroph-Symbiotroph	Animal Pathogen-Endophyte-Lichen Parasite-Plant Pathogen-Soil Saprotroph-Wood Saprotroph	Possible	Microfungus		UDB035664	SH1546322.08FU	406.7	96.24	AACGCACATTGCGCCCGCCAGTATTCTGGCGGGCATGCCTGTTCGAGCGTCATTACAACCCTCAGGCCCCCGGGCCTGGCGTTGGGGATCGGCGGAGCCCCCCGTGGGCACACGCCGTCCCCCAAATGCAGTGGCGGTCCCGCCGCAGCTTCCATCGCGTAGTAGCTAACACCTCGCGACTGGAGAGCGGCGCGGCCACGCCGTAAAACACCCAACTCTTCTGAAGTTGACCTCGAATCAGGTAGGAATACCCGCTGAACTTAA
OTU 217	341								Fungi 5	-	-	-	-						AACGCACATTGCGCTCTCTGGTATTCCGGGGAGCATGCTCGTTTCAGAATCATTAAAAATCTCAAAAGACACAGTTCTCGCATATTGCGAGGCTGTATCTTTCGGATGTGAGCCTCTTTGCTTTGATGCAATGGCTTGAAAATGATTGTGTTTGCTACCGGCCTTTTGGTTCGGTTCTCTCAAGTGCAACAGATGTTAATTCATTTCGTTAACTCTTGGTGAGAAACGTCCCTTCAACCGGTGTTGGCTTACACTCAACCAATCTATACCTTCAGCGATACGTGTATCGTTGTTTGATAACTTGGTCTGAAATCGAGCAAGAAAACCCGCTGAACTTAA
OTU 218	341	Ascomycota	Pezizomycotina	Sordariomycetes					Sordariomycetes 1	-	-	-	-		UDB024433	SH1648729.08FU			AACGCACATTGCGCCCGCCAGTATTCTGGCGGGCATGCCTGTTCGAGCGTCATTTCAACCATCAAGCCCCGCTTGTGTTGGGGACCTGCGGCTGCCCGCAGGCCCTGAAAACCAGTGGCGGGCTCGCTAGCAACACCGAGCGCAGTAGCAACATTACGCTCAGGTCGTGCGGCGGGTTCCGGCCGTTAAAAGAAGCAATTCTTTCCACAGGTTGACCTCGGATCAGGTAGGAATACCCGCTGAACTTAA
OTU 219	340	Ascomycota	Pezizomycotina	Dothideomycetes	Pleosporomycetidae	Pleosporales			Pleosporales	-	-	-	-		UDB028324		226.5	83.86	AACGCACATTGCGCCCCTTGGTATTCCATGGGGCATGCCTGTTCGAGCGTCATTTGTACCCTCAAGCTTTGCTTGGTGTTGGGTGTTTGTCCTCTCCCTGGTGTTTGGACTCGCCTTAAAACAATTGGCAGCCAGTGTTTTGGTATTGAAGCGCAGCACAAGTCGCGATTCTAACCTAGTAACACTTGCGTCCACAAGCCTTTTTTCACTTTTGACCTCGGATCAGGTAGGGATACCCGCTGAACTTAA
OTU 220	338	Basidiomycota	Ustilaginomycotina	Ustilaginomycetes	Ustilaginomycetidae	Ustilaginales	Ustilaginaceae		Ustilaginaceae	Pathotroph	Plant Pathogen	Probable	Facultative Yeast-Smut		UDB016255	SH1509412.08FU	398.1	85.68	AACGCACCTTGCGCTCCCGGCAGATCTAATCTGGGGAGCATGCCTGTTTGAGGGCCGCGAATTGTTTCGAACGACAACTTTTTTTCTTTTTTTTTTGAAGAGTTGGCGGATCGGTATTGAGGGTTTTGCCATTCACCGTGGCTCCCTCGAAATGCATTAGCGCATCCATTTGATAGGCAAGACGGACGAAAGCTCGATTTTCGCTCTCTCTTCCCTGCCGGGTTTTGATAATATCAGGACTTCGGAGAGGTTGAGATGGGTAAGAGCTGGACGCAACGGCTTGCTGTTTGGAGTGCTTCTGAAACCCGCCCATATCGAGCTTTGCCTCGGAAGGGATTTAATAATTCATCGGCCTCAGATTGGTAGGACTACCCGCTGAACTTAA
OTU 221	337	Ascomycota	Pezizomycotina	Sordariomycetes					Sordariomycetes 1	-	-	-	-		UDB024433	SH1648729.08FU			AACGCACATTGCGCCCGCCAGTATTCTGGCGGGCATGCCTGTTCGAGCGTCATTTCAACCATCAAGCCCCGGCGCTTGTGTTGGGGACCCGCGGCTGCCGCGGGCCCTTAAAGACAGTGGCGGTCTCGCTGCAGCACCGAGCGTAGTAACATACACATCTCGCTCCGGGAGCTGCGCGTGCAACCCGCCGTGAAACCCCCCACCTCTCACAAGGTTGACCTCGGATCAGGTAGGAATACCCGCTGAACTTAA
OTU 222	333	Ascomycota							Ascomycota	-	-	-	-		UDB034374	SH1527334.08FU	149.2	76.87	AACGCACATTGCGCCCTCTGGTATTCCGGGGGGCATGCCTGTTCGAGCGTCATTACACCACTCAAGCTCAGCTTGGTATTGGAAATCTTATCCACCCCCTTGGGGAGGGCAATTTTCAAAAACTAGCGGCGGTGCAGCCGGACTTCCCAGCGCAGTGACTTTACAATTCTCGCTACGGAACTCGACTGCTCCGGCCGGTAACCATTTTCTCCCCGGGGAAAATATCTTTCTATTGTTGACCTCGGATCAGGTAGGGATACCCGCTGAACTTAA
OTU 223	333	Ascomycota							Ascomycota	-	-	-	-		UDB020918	SH1591179.08FU	159.5	89.05	AACGCACATTGCGCCCTTTGGCATTCCGAAGGGCATACCTGTTCGAGCGTCATTACACCCTTCAAGCCTAGCTTGGTGTTGGGCGTCTGTCCCCGCGTTGCGCGGTGGACTCGCCTCAAAAGCATCGGCGTCCGGCGGTTGGTCTTGCGCGTAGCAAATTGTTCGCACAAGGGCCAGGCCGCGGGGCTGCCGCACACGTCTATGATTCTCAGTTTGACCTCGGATCAGGTAGGGATACCCGCTGAACTTAA
OTU 224	332	Ascomycota	Pezizomycotina	Sordariomycetes	Hypocreomycetidae	Hypocreales	Cordycipitaceae		Cordycipitaceae	Saprotroph	Undefined Saprotroph	Possible	Microfungus		UDB035683	SH1524421.08FU	281.4	88.14	AACGCACATTGCGCCCGGGAGCATTCTCCCGGGCATGCCTGTTCGAGCGTCATTTCAACCCTCGATTTCCCTTTGGGGAAGTCGGCCGTTGGAGATCGGCAGCACTGCCGGCTCCCAAATACAGTGGCGACCCGCCGCGGGGACCCCTGCGTAGTAACTTACACTCGCACCGGAAACCAGACGTGTCACGCCGTAAAACCCCCAACTTTCTGAACGTTGACCTCGGATCAGGTAGGAATACCCGCTGAACTTAA
OTU 225	330	Ascomycota	Pezizomycotina	Leotiomycetes	Leotiomycetidae	Helotiales			Helotiales	-	-	-	-		UDB031211	SH1543151.08FU	307.1	91.29	AACGCACATTGCGCCCCTTGGTATTCCGAGGGGCATGCCTGTTCGAGCGTCATATTAACCACTCCCGCTTGCGGGGTCTTGGGTTTCGCCTCTGGGCGGGCCTTAAAATCAGTGGCGGTGCCGTCTGGCTCTAAGCGTAGTAAATTATCCTCGCTATAGGGTCCAGGTGGATGCTTGCCAACAACCCCCAAATTTTTTAAGGTTGACCTCGGATCAGGTAGGGATACCCGCTGAACTTAA
OTU 226	328	Basidiomycota	Agaricomycotina	Agaricomycetes	Agaricomycetidae	Agaricales	Typhulaceae	Typhula	Typhula fistulosa 1	Pathotroph	Plant Pathogen	Probable	NULL		UDB033340	SH1525669.08FU			AACGCACCTTGCACTCTTTGGTATTCCGAAGAGTATGTCTGTTTGAGTGTCATGAAACTCTCAACCCCCTTGTTTTGTAATGAGACGAGTGTGGGCTTGGATTATGGCTGTTGCCGGCGTAACTGTCGACTCGGCTGAAATATACGAGCTACCCATTTCTAAGAAATAGACGGTTTGACTCGGCGTAATAACATATTTCGCTGAGGACGTCACATTCTTAATCGTCAGTGGTGCTTCTAATGCGACATCTAAATTTAAGCTTTAGACCTCAAATCAGTCAGGACTACCCGCTGAACTTAA
OTU 227	326	Ascomycota	Pezizomycotina	Sordariomycetes	Hypocreomycetidae	Hypocreales	Cordycipitaceae	Torrubiella	Torrubiella sp. 1	Pathotroph	Animal Pathogen	Probable	NULL		UDB033201	SH1557178.08FU			AACGCACATTGCGCCCCCTGGTATTCCGGGGGGCATGCCTGTCCGAGCGTCATTACAACCCTCAAGCCTAGCTTGGTGTTGGGCTCCGCCGCCTGGCGGGCCCTAAAGTCAGTGGCGGTGCTGTCCAGCTCCGAGCGTAGTAATTTTTCTCGCTCTGGAGGCCTGGGCATGTGCCTGCCAACAACCCCCCAATTTTATCAGGTTGACCTCGGATCAGGTAGGGATACCCGCTGAACTTAA
OTU 228	325	Basidiomycota	Agaricomycotina	Agaricomycetes	Agaricomycetidae	Agaricales	Psathyrellaceae		Psathyrellaceae	Saprotroph	Dung Saprotroph-Plant Saprotroph-Wood Saprotroph	Probable	Agaricoid		UDB037069	SH1566137.08FU	353.5	88.5	AACGCACCTTGCGCTCCTTGGTATTCCGAGGAGCATGCCTGTTTGAGTGTCATTAAATTCTCAACCTCACCCGTTTTGTCATGAAGCGGTCTGTGTAGGCTTGGATGTGGGGGTTTTGCAGGTCCAGCTTCTGGTCTGCTCCTCTGAAATGCATTAGTGGGTTGTGCCCCCCTAATCTATTGGTGTGATAATTATCTACGCCGTGGATCAGGATTGGCGATCAATGACCTGCTGATAACCGTCCGTCTCGGACAACACATTGACATTTTTGACCTCAAATCAGGTAAGACTACCCGCTGAACTTAA
OTU 229	325	Ascomycota							Ascomycota	-	-	-	-		UDB020918	SH1591179.08FU	173.2	79.25	AACGCACATTGCGGCCATAGGTATTCCTTTGGCCATGCCTGTTCGAGCGTCATTTACACCCTCAAGCCTAGCTTGGTGTTGGGCGTCTGTCCCGCCGTTCTCGCGCGCGGACTCGCCTCAAAGTCATTGGCGGCGGTCGTGCCGGCCCCCTCGCGCAGCACATTTGCGCTTCTCGGAGGCCCGGCGGATCCGCGCTCCAGCAAGACCTTTCACGACTTGACCTCGGATCAGGTAGGGATACCCGCTGAACTTAA
OTU 230	324	Basidiomycota	Agaricomycotina	Agaricomycetes	Agaricomycetidae	Agaricales			Agaricales	-	-	-	-		UDB036525	SH1574336.08FU	233.3	80.95	AACGCACCTTGCGCTCCTTGGTATTCCGAGGAGCATGCCTGTTTGAGTGTCATGAAATTCTCAACCCCCCCGTCTCTTTCGAGAGGCGCGGGGGCTTGGACTTTGGGGGTCTTGCTGGCTGAAAAGTCGGCTCCCCTTGAATGCATTAGCTGGACTGTCCGATGTATTTCGGAGCGGTATGCGGTGTGATAACTATCTACGCCATTGTAAATCCGTCCTGTCAAGCTTCCAACCCGCGTCTCTCCCCTCTGCGGGATTGCGCACTTTTATCAATCTGACCTCAAATCAGGTAGGACTACCCGCTGAACTTAA
OTU 231	324	Basidiomycota							Basidiomycota	-	-	-	-		UDB036832	SH1517762.08FU	125.2	81.76	AACGCACCTTGCGCTCTTTGGTATTCCGAAGAGCATGCCTGTTTGAGTGTCATGAAAATATCAACCTTGACTTGGGCTTTGTGCACAAGTCCTAGGCTTGGATGTGGGTGCTTGCCGCTTTAACGCGCGGCTCACCTTAAATGTATTAGCTGGATCAGTCTTTGAGACTTGGTTTGACTTGGCGTAATAAGTATTTCGCTAAGGACATTCTTCGGGATGGCCTCGTTTCTGGGACACCTGTCCGCTTTCCAATACAAGTTCCAGAAATGGACATGACTTTTTTTTTAATCATCTGGCCTCAAATCAGGTAGGACTACCCGCTGAACTTAA
OTU 232	311	Ascomycota	Pezizomycotina	Leotiomycetes	Leotiomycetidae	Helotiales	Helotiaceae	Crocicreas	Crocicreas furvum 1	Saprotroph	Undefined Saprotroph	Probable	Pezizoid		UDB003014	SH1573385.08FU			AACGCACATTGCGCCCCGTGGTATTCCGCGGGGCATGCCTGTTCGAGCGTCATTTCAACCAATCCAGCGTGCTGGGTCTTGGGCTTCGCCTCCGGGCGGGCCTTAAAATCAGTGGCGGCGCCACCCGGCTCTAAGCGTAGTAATTCTTCTCGCCACAGGGTCCCGGGTGGAGGCTGGCCAGCAACCCCTAAATTTTCAAAGGTTGACCTCGGATCAGGTAGGGATACCCGCTGAACTTAA
OTU 233	309	Ascomycota							Ascomycota	-	-	-	-		UDB028324		164.7	78.85	AACGCACATTGCGCCCCTTGGTATTCCATTGGGCATGCCTGTTCGAGCGTCATTTACCCCCTCAAGCTCACGCTTGGTGTTGGGCGTCTGTCCGCGCTTTTGAGCGTGGACTCGCCCCAAATTCATTGGCAGCGGCTTCGCCGGCTTTTCGCGCAGCACTTTGCGTCCAGGAAGGCTTTCGGCGGGCTCGCGTCCATCAAGACACCCCTCATTTTGACCTCGAATCAGGTAGGGATACCCGCTGAACTTAA
OTU 234	307	Ascomycota	Pezizomycotina	Leotiomycetes	Leotiomycetidae	Helotiales			Helotiales	-	-	-	-		UDB031207	SH1523059.08FU	317.4	92.12	AACGCACATTGCGCCCCTTGGTATTCCGGGGGGCATGCCTGTTCGAGCGTCATTAATACCAATCTAGCCCGGCTAGGTGTTGGGCCTCGCCGTCTGGCGGGCCTTAAAATCAGTGGCGGTGCTCCTCAGCTCTACGCGTAGTAATTCTTCTCGCTATAGGGCCTGTGGAGATACTTGCCAGCAACCCCAAATTTTTTCAGGTTGACCTCGGATCAGGTAGGGATACCCGCTGAACTTAA
OTU 235	307	Ascomycota							Ascomycota	-	-	-	-		UDB020918	SH1591179.08FU	171.5	79.17	AACGCACATTGCGCCCTTTGGTATTCCTTAGGGCATGCCTGTTCGAGCGTCATTTAAACCTTCAAGCTCTGCTTGGTGTTGGGCATGTCACGCCCCCCTCCGCGGGGGTGTGCGCCTCAAATCTATTGGCGGCCGGTACGTTGGCTTCGAGCGCAGCAGAAACGCGAACTCGGGGACTCCGGATCGGCCCTCCACAAGCTATTTTATCATTTTGACCTCGGATCAGGTAGGGATACCCGCTGAACTTAA
OTU 236	307	Ascomycota	Pezizomycotina	Sordariomycetes					Sordariomycetes 1	-	-	-	-		UDB024433	SH1648729.08FU			AACGCACATTGCGCCCACTAGTATTCTGGTGGGCATGCCTGTTCGAGCGTCATTTCAACCCTCAAGCCTGGCTTGGTGTTGGGGCCCTGCGCCTGCAGGCCCTTAAATTCAGTGGCGGACACGCTAGGTCTCCGAGCGCAGTAGTTTCTTCTCGCTCAGGGCGTCCGGCGTGCGCTTGCCTCGCACCCAATTTTATCAAGGTTGACCTCGGATCAGGTAGGAATACCCGCTGAACTTAA
OTU 237	302	Ascomycota	Pezizomycotina	Eurotiomycetes	Eurotiomycetidae	Eurotiales	Aspergillaceae	Penicillium	Penicillium sp.	Saprotroph	Undefined Saprotroph	Possible	Microfungus		UDB035689	SH1529988.08FU	317.4	90.08	AACGCACATTGCGCCCTCTGGCATTCCGGAGGGCATGCCTGTCCGAGCGTCATTTCTGCCCATCAAGCACGGCTTGGGTGTTGGGTCGTCGTCCCCCCCGGGGGACGGGCCCGAAAGGCAGCGGCGGTACCGTCCGGTCCTCGAGCGTATGGGGCTTTGTCACCCGCTCGATTAGGGCCCGGCCGGCGCCAGCCGTCAACCATAAATCTTTTTTTTTCAGGTTGACCTCGGATCAGGTAGGGATACCCGCTGAACTTAA
OTU 238	299	Basidiomycota	Agaricomycotina	Agaricomycetes	Agaricomycetes sbc Incertae sedis	Cantharellales	Cantharellales fam Incertae sedis	Sistotrema	Sistotrema oblongisporum 1	Saprotroph-Symbiotroph	Ectomycorrhizal-Wood Saprotroph	Possible	Corticioid		UDB031052	SH1512589.08FU			AACGCACCTTGCGCTCCCTGGTATTCCGGGGAGCACGCCTGTTCGAGCGTCATGAAGCTCTCAAACACTATCTTTTCTTAACTGAGAAGGTAGCCGTTTGGATTTGGACTCTGCCGTGTAACAAACGGCTGGTCCGAAAGGTATTAGCTGATCCTAGTGAAACTCGGTTCTACTCGGCGTGATAATTATCTAACGTCGAGGACATCGTAAAGGTGGCCAAGTTAAACTTGATGGATTGCTTCTAATCGTCTTCATCGACAACATATCATCAATCTGACCTCGAATCAGGTGGGACTACCCGCTGAACTTAA
OTU 239	299	Ascomycota	Pezizomycotina	Dothideomycetes	Pleosporomycetidae	Pleosporales			Pleosporales	-	-	-	-		UDB025129	SH1635394.08FU	223.0	83.53	AACGCACATTGCGCCCCTTGGTATTCCATGGGGCATGCCTGTTCGAGCGTCATTTGTACCCTCAAGCTCTGCTTGGTGTTGGGTGTTTGTCCTCTCCCTAGTGTTTGGACTCGCCTTAAAATAATTGGCAGCCAGTGTTTTGGTATTGAAGCGCAGCACAAGTCGCGATTCTTATCAAATACTTGCGTCCACAAGCCCTTTTTTAACTTTTGACCTCGGATCAGGTAGGGATACCCGCTGAACTTAA
OTU 240	296	Ascomycota	Pezizomycotina	Leotiomycetes	Leotiomycetidae	Helotiales	Hyaloscyphaceae	Calycellina	Calycellina sp.	Saprotroph	Undefined Saprotroph	Probable	NULL		UDB034361	SH1566313.08FU	272.8	93.81	AACGCACATTGCGCCCTCTGGTATTCCGGAGGGCATGCCTGTTCGAGCGTCATTATGACCAAATCACCCCCGTGGTGGACTTGGAGCTGGCCTAACTGGCCTCTCTTAAAATCAGTGGCGGTGCTCTTAAGCTCTACGCGTAGTAATTTTCTCGCGACAGGTCTTAGGTGTTACTTGCCAACAACCCCAACTATTATAAGGTTGACCTCGGATCAGGTAGGGATACCCGCTGAACTTAA
OTU 241	296	Ascomycota	Pezizomycotina	Sordariomycetes					Sordariomycetes 1	-	-	-	-		UDB024433	SH1648729.08FU			AACGCACATTGCGCCCGCTAGTATTCTGGCGGGCATGCCTGTTCGAGCGTCATTTCAACCCTCAGGCCCCGCCTGGTGTTGGGGACCCCGCGGCCGCCGCGGGCCCCGAAAATCAGTGGCGTGCTCGCCGCGAGCCCGAGCGTAGTAATCATCCTCGCTTTGGGAACGCCGCGGGCGCCCGCCGTGAAACCCCCCACTTATTCAGGTTGACCTCGGATCAGGTAGGAATACCCGCTGAACTTAA
OTU 242	287	Basidiomycota	Agaricomycotina	Agaricomycetes	Agaricomycetes sbc Incertae sedis	Russulales	Peniophoraceae	Subulicystidium	Subulicystidium perlongisporum	Saprotroph	Undefined Saprotroph	Probable	Corticioid		UDB028355	SH1546036.08FU	449.6	97.19	AACGCACCTTGCGCCCTTTGGTATTCCGATGGGCATGCCTGTTCGAGTGTCTTGAATTCATCGCCGCCTCCGGTTTTGCGACCGGCTGGCGGCGGACTTGGGGGTCTGCCGCGGCAACGCGGCTCCCCTCGAAAGCATCGGTGGGGTCTCCGAGCACCCACGGGCGTTGTATTGTCCTCGTCCGACCGGGCCTCGTGTCCCCCGCCTCGACCGCCGTATGAGCGGCGGTCAAGCACACTTTGAAATCTGACCTCGAATCAGGTAGGACTACCCGCTGAACTTAA
OTU 243	287	Ascomycota	Pezizomycotina	Sordariomycetes					Sordariomycetes 1	-	-	-	-		UDB024433	SH1648729.08FU			AACGCACATTGCGCTCGCCAGTATTCTGGCGAGCATGCCTGTTCGAGCGTCATTTCAACCATCAAGCTCTGCTTGCGTTGGGGATCCGCGTCTGACGCGGTCCCTCAAAAACAGTGGCGGGCTCGCTAGTCACACCGAGCGTAGTAACTCTACATCGCTATGGTCGTGCGGCGGGTTCTTGCCGTAAAACCCCCAATTTCTAAGGTTGACCTCGGATCAGGTAGGAATACCCGCTGAACTTAA
OTU 244	282	Ascomycota	Pezizomycotina	Sordariomycetes					Sordariomycetes 1	-	-	-	-		UDB024433	SH1648729.08FU			AACGCACATTGCGCCCGCGAGTATTCTCGCGGGCATGCCTGTTCGAGCGTCATTTCAACCATCAAGCCCCCCGGCTTGTGTTGGGGACCTGCGGCTGCCCGCAGGCCCTGAAATCCAGTGGCGGGCTCGCTGTCGCACCGAGCGTAGTAGCATACTTCTCGCTCCGGGAGCGCGGCGGGCGCCTGCCGTAAAACCCCCCCACGTACCAAAGGTTGACCTCGGATCAGGTAGGAATACCCGCTGAACTTAA
OTU 245	282	Ascomycota	Pezizomycotina	Leotiomycetes	Leotiomycetidae	Helotiales	Helotiaceae		Helotiaceae	Saprotroph-Symbiotroph	Ectomycorrhizal-Fungal Parasite-Plant Pathogen-Wood Saprotroph	Probable	Microfungus		UDB028187	SH1523754.08FU	264.2	87.65	AACGCACATTGCGCCCCTTGGTATTCCGGGGGGCATGCCTGTTCGAGCGTCATTAACACCACTCAAGCCTGGCTTGGTATTGGGGTTCGCACACCAGCGGCTCTTAAACTCAGTGGCGGTGCCGTAGGGCTCTTAGCGTAGTAATTCTTCTCGCTATAGGGTCTTCCGGTGTCTTGCCATAACCCAAATTTTTAAGGTTGACCTCGGATCAGGTAGGGATACCCGCTGAACTTAA
OTU 246	280	Basidiomycota	Agaricomycotina	Agaricomycetes	Agaricomycetes sbc Incertae sedis	Cantharellales	Cantharellales fam Incertae sedis	Sistotrema	Sistotrema oblongisporum 1	Saprotroph-Symbiotroph	Ectomycorrhizal-Wood Saprotroph	Possible	Corticioid		UDB031052	SH1512589.08FU			AACGCACCTTGCGCTCCCTGGTATTCCGGGGAGCACGCCTGTTCGAGCGTCATGAAGCTCTCAAACACTATCTTTTCTTAACTGAGAAGGTGGCCGTTTGGATTTGGACTCTGCCGTGTAACAAACGGCTGGTCCGAAAGATATTAGCTGATCCTAGCGAAGCTTGGTTCTACTCGGCGTGATAATTATCTGACGTCGAGGACATCGCAAGATGGCCAAAATTTGTTTTATGGATTGCTTCTAATCGTCTTCATCGACAACACATCATCAATCTGACCTCGAATCAGGTGGGACTACCCGCTGAACTTAA
OTU 247	278	Basidiomycota	Pucciniomycotina	Pucciniomycetes	Pucciniomycetes sbc Incertae sedis	Pucciniales	Pucciniaceae		Pucciniaceae	Pathotroph	Plant Pathogen	Probable	Rust		UDB036432	SH1518788.08FU	312.3	85.94	AACGCACCTTGCGCCTTTTGGTATTCCAAAAGGCACACCTGTTTGAGTGTCATGAAACCCTCTCACAAAACAACTTTATTGTTGCTTTTTTTGTGGATGTTGAGTGTTGCTATATATTTATAGCTCACTTTAAATATATAAGTCACACTTTTCAAGTAAGTTGGATTGACTTGGTGTAATAATTTTATCATCACATCAAGGAAAGTAGCAATACTTGCCATCTTTTGAAAGGAGGGACTCCTAAAAAACCCCTCATAACCTTTTTTTAAGACCTCAAATCAGGTGGGACTACCCGCTGAACTTAA
OTU 248	278	Ascomycota	Pezizomycotina	Leotiomycetes	Leotiomycetidae	Helotiales	Helotiales fam Incertae sedis		Helotiales fam Incertae sedis	-	-	-	-		UDB016230	SH1509701.08FU	288.3	89.67	AACGCACATTGCGCCCTCTGGTATTCCGGGGGGCATGCCTGTTCGAGCGTCATTACAACCCTCAAGCTTTGCTTGGTATTGGACATTGCCAGTTTCTGGCAGGTCTTAAAATCAGTGGCGGTGCCATTTGGCTTCAAGCGTAGTAATTCTTCTCGCTTTGGAGATCCAGGTGGTTACTTGCCAATAACCCCCAATTTTTTCAGGTTGACCTCGGATCAGGTAGGGATACCCGCTGAACTTAA
OTU 249	276	Ascomycota	Pezizomycotina	Sordariomycetes	Hypocreomycetidae	Hypocreales			Hypocreales	Saprotroph	Undefined Saprotroph	Possible	Microfungus		UDB035658	SH1513367.08FU	252.2	84.96	AACGCACATTGCGCCCGCCAGTATTCTGGCGGGCATGCCTGTCTGAGCGTCATTTCAACCCTCAGCCCCCGTTCGCGGGGCGCTGGCGTTGGGGCCCGGCCGTCCTCGCGGCGGCCGTCCCCGAAACACAGTGGCGGTCTCCCGCAGACTCCCCTGCGTAGTAGCACTACCTCGCAGAAGGGACGAGCGGGCTGGCCACGCCGTAAAACACCCCACTTCTCCAGGTTGACCTCAGATCAGGTAGGAATACCCGCTGAACTTAA
OTU 250	274	Basidiomycota	Agaricomycotina	Agaricomycetes	Agaricomycetidae	Agaricales	Tricholomataceae	Mycena	Mycena stylobates 1	Pathotroph-Saprotroph	Leaf Saprotroph-Plant Pathogen-Undefined Saprotroph-Wood Saprotroph	Probable	Agaricoid		UDB022101	SH1542139.08FU			AACGCACCTTGCGCCCTTTGGTATTCCGAAGGGCATGCCTGTTTGAGTGTCATTAAATTCTCAACCTTGAAAGGCTTGTCTTTTCAATGGCTTGGATGTGAGGGTTTTGCTGGCTTCCTTCAGTGGATGGTCTGCTCCCTTTAAAAGCATTAGTGGGATCCTTTGTGGACGGTCACTTGGTGTGATAATTATCTACGCCGTTTGTACTGTGAAGCAAAACTTGTGGGAACCTGCTTATAACCGTCTGTAATGGACAATTTTGAACCTTTGACCTCAAATCAGGTAGGACTACCCGCTGAACTTAA
OTU 251	269								Fungi	-	-	-	-		UDB024118	SH1516552.08FU	381.0	91.06	AACGCACCTTGCGCCCTTTGGTATTCCGAAGGGCACACCTGTTTGAGTGTCATTAATTCCTCAACCCTACCATTTTTTAAAATGGTAGTGGTTGGATGTTGAGCGCTGCTGGATCTTTGGTTCAGCTCGCTTTAAATTTATGAGCAGGCTCCTACTCTTTCGGACTGACTCAACGTGATAAGAAATTTCGTTGAGGACGCTTTACCGCGGCCGAATGTTGGGGAAATGCCGCTGCTAGTTGACCCCTATATTTTAGACCTCAAATCAGGTGGGACTACCCGCTGAACTTAA
OTU 252	266	Basidiomycota	Agaricomycotina	Agaricomycetes	Agaricomycetes sbc Incertae sedis	Cantharellales	Ceratobasidiaceae		Ceratobasidiaceae	Pathotroph-Saprotroph-Symbiotroph	Endomycorrhizal-Plant Pathogen-Undefined Saprotroph	Possible	Microfungus		UDB028157	SH1608945.08FU	399.9	89.82	AACGCACCTTGCGCTCCTTGGTATTCCTTGGAGCATGCCTGTTTGAGTATCATGAGCAAATCTCAAAGTCGATCCTTTTGTTAAATTCAATTGGGTTTGCTTTGGACTTGGAGGTCTTTGCAGATTTTCACCGTCTGCTCCTCTTAAATGCATTAGCTGGATCTCAGTATTATGCTTGGTTCCACTCGGCGTGATAAGTATCACTCGCTGAGGACACTGTTAAAAAGGTGGCCAGGAAAATACTGATTGAACCGCTTCTAACGGTCTATTAACTTAGACAAAATTACCCTTAAGTTTGATCTCAAATCAGGTAGGACTACCCGCTGAACTTAA
OTU 253	266	Basidiomycota	Agaricomycotina	Agaricomycetes	Agaricomycetidae	Boletales	Boletaceae	Strobilomyces	Strobilomyces strobilaceus 1	Symbiotroph	Ectomycorrhizal	Highly Probable	Boletoid	Long-distance d	UDB011964	SH1556757.08FU			AACGCATATTGCGCTCTCTGGTACTCCGGAGAGCATGCCTGTTTGAGGGTAATTAATTAAATCTTTGATCTTTCTTGATCAAGGGATATGGGCATTCCGTGTTAAGAGCGGTGGCCTAAAATGTATGGTTAGTCTCATCAAGTTGAGATGTGTAATAATATTTATTTCGCAAAACATTTGATGAATTACCAAGTTTTGATCTATCCAACTCTGTTAGATATGGTCAAAACAAATATTTTTGACATTACCTCAAATCAGGTAGGAATACCCGCTGAACTTAA
OTU 254	265	Ascomycota							Ascomycota	-	-	-	-		UDB020918	SH1591179.08FU	150.9	88.64	AACGCACATTGCGCCCTTTGGCATTCCGAAGGGCATACCTGTTCGAGCGTCATTTCAACCCTCAAGCCTGGCTTGGTGTTGGGCGTTTTGTCCCGCTACATGCGCGGACTCGCCTCAAAAGAATCGGCGTCTACATGTGGGCCTGATGCGTAGTAAAATTCGCAGACCAGGCTGGCGTGCTGGCGGCCGGAACGTACATATCTTTTTGTTTGACCTCGGATCAGGTAGGGATACCCGCTGAACTTAA
OTU 255	264	Ascomycota	Pezizomycotina	Leotiomycetes	Leotiomycetidae	Helotiales	Hyaloscyphaceae	Hyphodiscus	Hyphodiscus hymeniophilus 1	Pathotroph	Fungal Parasite	Highly Probable	Microfungus		UDB032143	SH1522972.08FU			AACGCACATTGCGCCCCTTGGTATTCCGAGGGGCATGCCTGTTCGAGCGTCATTTCAACCCCTCAAGCTTCGGCTTGGTGTTGGGCCGCGCCGCTGCACCAGCAGCTGGCGGGCCTCAAAATCAGTGGCGGTGCCGTCTCGGCTCTAAGCGTAGTAACATCTCTCGCTCTGGAGACCTGGCGGTGGCTTGCCAGACAACCCCCAACTTTCTTTAAGGTTTGACCTCGGATCAGGTAGGGATACCCGCTGAACTTAA
OTU 256	263	Basidiomycota	Agaricomycotina	Agaricomycetes	Agaricomycetes sbc Incertae sedis	Cantharellales	Cantharellales fam Incertae sedis	Sistotrema	Sistotrema sp.	Saprotroph-Symbiotroph	Ectomycorrhizal-Wood Saprotroph	Possible	Corticioid		UDB028054	SH1506094.08FU	446.2	93.48	AACGCACCTTGCGCTCCTTGGTATTCCGAGGAGCACGCCTGTTCGAGTGTCATGAAGCTCTCAAGCGATAGTAACTTTATTGTTATTGTTTAGCTTGGATTTGGGACTTGCTGTGTTACAACGGCTGTCCCTAAATGTATTAGCCGGCTCTAATGGAAGACTTGGTTCTTACTCGGTGTGATAATTATCTTACGCTGAGGACATTTCTCTTTATTGAGAGATGGCCAGACTTCTATTAGACTGCTTCTAATCGTCTCTTCTGACAAACAAATTATTCAAATCTGACCTCGAATCAGGTGGGACTACCCGCTGAACTTAA
OTU 257	263	Ascomycota	Pezizomycotina	Sordariomycetes	Hypocreomycetidae	Hypocreales	Tilachlidiaceae		Tilachlidiaceae	Saprotroph	Undefined Saprotroph	Possible	Microfungus		UDB035658	SH1513367.08FU	262.5	85.71	AACGCACATTGCGCCCGCCAGTATTCTGGCGGGCATGCCTGTCTGAGCGTCATTTCAACCCTCAGCCCCCGCTCGCGGGGCGCTGGCGTTGGGGATCGGCCGTCCTCGCGGCGGCCGGCCCCGAAACACAGTGGCGGTCTCTCGCGGACTCCCCTGCGTAGTAGCACTACCTCGCAGAAGGGACGAGCGGGCTGGCCACGCCGTAAACCCCCCCACTTCTCAAGGTTGACCTCAGATCAGGTAGGAATACCCGCTGAACTTAA
OTU 258	263	Ascomycota	Pezizomycotina	Pezizomycetes	Pezizomycetidae	Pezizales			Pezizales	-	-	-	-		UDB028342	SH1573893.08FU	209.3	82.06	AACGCACATTGCGCCCTCTGGTATTCCGGGGGGCATGCCTGTTCGAGCGTCATCAAAACTTCTCAGGTGTCGGTTTTGTACCAACTCCTGGTCATGGAATCGGAGGTGCGATGCACATCCTTTCCGAAATCCAGTGGCGAATTGACCATGCTGTAGACGTAGTAAGACATACCCGTTAGCAACATGTTCACATTCCGCCATAACCCCCTCTTATATTCCGGTTTGACCTCGGATCAGGTAGGGATACCCGCTGAACTTAA
OTU 259	261	Basidiomycota	Agaricomycotina	Agaricomycetes	Agaricomycetes sbc Incertae sedis	Cantharellales	Ceratobasidiaceae		Ceratobasidiaceae	Pathotroph-Saprotroph-Symbiotroph	Endomycorrhizal-Plant Pathogen-Undefined Saprotroph	Possible	Microfungus		UDB028157	SH1608945.08FU	386.1	89.16	AACGCACCTTGCGCTCCTTGGTATTCCTTGGAGCATGCCTGTTTGAGTATCATGAAATCTTCAAAGTAAATCTTTTGTTAACTCAATTGGTTTCTACTTTGGTATTGGAGGCCATTGCAGCTTCACACCTGCTCCTCTTTGTTCATTAGCTGGATCTCAGTGTTATGCTTGGTTCCACTCAGCGTGATAAGTTATCTATCGCTGAGGACACTGTAAAAGGTGGCCAAGGTAAATGCAGATGAACCGCTTCTAATAGTCCATTGACTTGGACAATAAATTAATTTTTATGATCTGATCTCAAATCAGGTAGGACTACCCGCTGAACTTAA
OTU 260	261	Basidiomycota	Agaricomycotina	Tremellomycetes	Tremellomycetes sbc Incertae sedis	Cystofilobasidiales			Cystofilobasidiales	-	-	-	-		UDB028113	SH1556067.08FU	298.6	84.19	AACGCACCTTGCGCTCCTTGGTATTCCGAGGAGCATGCCTGTTTGAGTGTCATGAAACTCTCAACCTCCAACTTTCTTAATAGTGGTTGGCGGCTTGGACTTGAGCGCTGCTGGTTTTTATTAACCGGCTCGCTTGAAATGAATTAGCAGATCCTTTTTGTAATCGGTTCCACTCGACGTAATAAGTATTTCGCCGAGGACATCTTAACGGATGGCCGAGATAAAGAAAGTCTTTAGATCCGCTTCTAATTCTTAGATAACGCAAGTTACTAAACCCATTTTATGATCTGGCCTCAAATCAGGTAGGACTACCCGCTGAACTTAA
OTU 261	261	Ascomycota	Pezizomycotina	Eurotiomycetes	Eurotiomycetidae	Eurotiales	Aspergillaceae	Penicillium	Penicillium sp.	Saprotroph	Undefined Saprotroph	Possible	Microfungus		UDB035661	SH1529988.08FU	326.0	90.8	AACGCACATTGCGCCCCCTGGTATTCCGGGGGGCATGCCTGTCCGAGCGTCATTGCTGCCCTCAAGCACGGCTTGTGTGTTGGGCCCCGCCCCCCGGTTCCGGGGGGCGGACCCGAAAGGCAGCGGCGGCACCGCGTCCGGTCCTCGAGCGTATGGGGCTTCGTCACCCGCTCTGTAGGCCCGGCCGGCGCCCGCCGGCGACCCCCAATCAATCTATCCAGGTTGACCTCGGATCAGGTAGGGATACCCGCTGAACTTAA
OTU 262	259	Basidiomycota	Agaricomycotina	Agaricomycetes	Agaricomycetidae	Agaricales	Typhulaceae	Typhula	Typhula fistulosa 1	Pathotroph	Plant Pathogen	Probable	NULL		UDB033340	SH1525669.08FU			AACGCACCTTGCACTCTTTGGTATTCCGAAGAGTATGCCTGTTTGAGTGTCATGAAATCTTCAACCATTCTGTTGGGTGTTTACGCCTGGCGGTTTGGATTGGACTTGGGTGTTTGTCGGACAAGCAATTGTCTGACTCACCTTAAAAGGATCAGTGGATCTATTGTCTTGGACTTTTGCATTGCAATTGGTTTGACTTGGCGTAATAAGTATTTCGCTAAGGACAGTGCTTCGGTGCTGGCCATTGCTTTTCAACCGGACTTTGGAAATCGCTTTCTAACCCTAATTTTATTTGACATCTGGCCTCAAATCAGGTAGGACTACCCGCTGAACTTAA
OTU 263	259	Ascomycota	Pezizomycotina	Leotiomycetes	Leotiomycetidae	Helotiales	Helotiaceae	Bisporella	Bisporella sp.	Saprotroph	Wood Saprotroph	Probable	Microfungus		UDB019757	SH1522953.08FU	367.2	96.25	AACGCACATTGCGCCCCTTGGTATTCCGGGGGGCATGCCTGTTCGAGCGTCATTTCAACCCTCAAGCTCTGCTTGGTCTTGGGCCCTGCCGGCAACGGCTGGCCTCAAAAGTAGTGGCGGCGCCATCGTGCTCTCAGCGTAGTAATTCTTCTCGCTGTTGGGTCCCGGTGGACGCTGGCCAGCAACCCCCCATTTTCTAATGTTGACCTCGGATCAGGTAGGGATACCCGCTGAACTTAA
OTU 264	258	Ascomycota	Pezizomycotina	Sordariomycetes	Hypocreomycetidae	Hypocreales	Nectriaceae	Ilyonectria	Ilyonectria sp.	Saprotroph	Undefined Saprotroph	Possible	Microfungus		UDB027562	SH1546325.08FU	360.4	93.77	AACGCACATTGCGCCCGCCAGTATTCTGGCGGGCATGCCTGTTCGAGCGTCATTTCAACCCTCAAGCCCCCGGGCTTGGTGTTGGGGATCGGCCGCCCTCCGGCGCGCCGGCCCCGAAATCTAGTGGCGGTCTCGCTGTAGCCTCCTCTGCGTAGTAACACACCTCGCACCGGAACGCAGCCTGGCCACGCCGTTAAACCCCCCACTTCTGAAGGTTGACCTCGGATCAGGTAGGAATACCCGCTGAACTTAA
OTU 265	258	Ascomycota	Pezizomycotina	Dothideomycetes	Pleosporomycetidae	Pleosporales			Pleosporales	-	-	-	-		UDB028324		209.3	82.24	AACGCACATTGCGCCCCTTGGTATTCCATGGGGCATGCCTGTTCGAGCGTCATTTACACCCTCAAGCTCTGCTTGGTGTTGGGCGTCTGTCCCGCCTCTGCGCGTGGACTCGCCCCAAATTCATTGGCAGTGGCTCTTGCCTCCTCTCGCGCAGCACATTGCGCTTCTCGGGGAGCTTGGGAGCCGCGACCACGAAGCTCAATTTACCGTCTTTGACCTCGGATCAGGTAGGGATACCCGCTGAACTTAA
OTU 266	257	Ascomycota	Pezizomycotina	Sordariomycetes	Hypocreomycetidae	Glomerellales			Glomerellales	-	-	-	-		UDB011028	SH1578121.08FU	223.0	82.08	AACGCACATTGCGCCCGCTAGTATTCTGGCGGGCATGCCTGTCCGAGCGTCATTTCAACCCCTCGAGCCCCCGGGCCCGGTGTTGGGGACCGACCCAAGCCCTGCCGCCTCGGCGGCGGGCGGTCGTCCCTGAAATCTAGTGGCGGTCACGTCGCGGACCCTCTGCGTAGTAGCAACACCTCGCACTGGAGAGCGGCGCGCCCACGCCCCAAACCACTTTTTTAAAGGTTGACCTCGGATCAGGTAGGAATACCCGCTGAACTTAA
OTU 267	256	Ascomycota							Ascomycota	-	-	-	-		UDB025008	SH1529414.08FU	97.7	81.6	AACGCACATTGCGCCCGCTAGTATTCTGGCGGGCATGCCTGTTCGAGCGTCCTTTGGACCCTCGGGCCCGGGTGACTTTGTCCCCTGCGGCCCGGTGTTGGGGACCCGCGGCTGCCGCGGCCCCCTAAAGACAGTGGCGGACTTCTTTACAGCCCTGGCGCAGTAGCACATCTCGCCTTCGGTTATAGAGTATGTCTTGCCCCCAGCACCATACTTACAAAGCTGGACCTCGAATCAGGTAGGAATACCCGCTGAACTTAA
OTU 268	255	Ascomycota	Pezizomycotina	Pezizomycetes	Pezizomycetidae	Pezizales	Pyronemataceae	Pulvinula	Pulvinula sp.	Symbiotroph	Ectomycorrhizal	Possible	NULL	Unknown	UDB025652	SH1621899.08FU	332.9	90.41	AACGCACATTGCGCCTCCTGGCATTCCGGGAGGCATGCCTGTTCGAGCGTCATCAAACCCCCTTCAAGCCTGGATTCATCCATGACTTGGTGTTGGAGTTGGAGTGTCCGTAGGCCATTCCTTTCCGAAATCCCATGGCGGTGTTGTCCGTACCGATGAGTGTAGTAATCAACATTATGTTTCGCTCTTGTATGGATCATCTCTAGCCGTTAACCCCCAATATTATTAAGTGTTTGACCTCGGATCAGGTAGGGATACCCGCTGAACTTAA
OTU 269	249	Ascomycota							Ascomycota	-	-	-	-		UDB027689	SH1506867.08FU	152.6	77.74	AACGCACATTGCGCCCGCCAGCACTCTGGCGGGCATGCCTGTTCGAGCGTCATTTCGACCCTCAAGCTCCGGCTTGCCGTTGGGGCGCCTCGGTCCAGCACCGAGGGCCCCGAATCTCAGTGGCGGAGCCGTCGTGGACTCTGAGCGCAGTACCTAACCACGCTCCTGGGCCCCGGCGGCGCCTGCCGTTAAACAACCCAACGCAAGTCTTGACCTCGGATCAGGTAGGGATACCCGCTGAACTTAA
OTU 270	246	Basidiomycota	Agaricomycotina	Agaricomycetes	Agaricomycetes sbc Incertae sedis	Russulales	Peniophoraceae	Subulicystidium	Subulicystidium perlongisporum	Saprotroph	Undefined Saprotroph	Probable	Corticioid		UDB028354	SH1546030.08FU	454.8	100.0	AACGCACCTTGCGCCCATTGGTATTCCGATGGGCATGCCTGTTCGAGTGTCTTGAATTCATCGCCGCCTCCGGTTTCGCGACCGGCTGGCGGCGGACTTGGGGGCCTGCCGCGGCGACGCGGCTCCCCTTGAATGAATCGGTGGGGTCTCCGAGCACCCACGGGCGTTGTATTGTCCTCGTCCGACCGGGCCTCGTGTCCCCCGCCTCGACCGCCGTATGAGCGGCGGTCAAGCACTTTGAAATCTGACCTCGAATCAGGTAGGACTACCCGCTGAACTTAA
OTU 271	245	Basidiomycota	Agaricomycotina	Agaricomycetes	Agaricomycetidae	Agaricales	Entolomataceae	Clitopilus	Clitopilus hobsonii 1	Saprotroph	Undefined Saprotroph	Probable	Agaricoid		UDB031084	SH1574428.08FU			AACGCACCTTGCGCTCCTTGGTATTCCGAGGAGCATGCCTGTTTGAGTGTCATTAAATTCTCAACTATACAAGTTTTTATAACCTGCATAGCTTGGATCTTGGGATTTGCGGGCTTTCACAAGTCGGCTATCCTTAAATGTATTAGCAGAGCTTTTGCCGCTAATCATTGGTGTGATAATTATCTACGCCATTGAGAGGTGACATACTGAGGCTTAGCTTCTAATCGTCTTCACAGACAACTTTTGACAATCTGACCTCAAATCAGGTAGGATTACCCGCTGAACTTAA
OTU 272	239	Basidiomycota							Basidiomycota	-	-	-	-		UDB013417	SH1519326.08FU	126.9	88.39	AACGCACCTTGCGCTCCTTGGTATTCCGAGGAGCATGCCTGTTTGAGTGTCATGAAACTCTCAAACCCAAGTTTTGGATTTCGATCCATGCTTGAGTTTGGATTTGGATGTTTGCCGGTGATAAGCCGACTCATCTTAAAAGTATTAGCTAGATCTGTCTCTATGACTGGTTTGACTTGGCATAATAAGTATTTTGCTGAGGACATCTTCGGATGGCCAGGACCTAGACTATTGTCTGCTAACTAAACCATCACTTTAAGTGCATCTTCGGATGTTACTCATTGTGTAACTTTGACATCTGGCCTCAAATCAGGTAGGACTACCCGCTGAACTTAA
OTU 273	235	Basidiomycota							Basidiomycota 5	-	-	-	-						AACGCACCTTGCGCTCTCGGGTTATTCCTGGGAGCATGTTCGTTGGAGTGTCGCGTACCTCTCAACCCCGTCCCTTGCAAAAGGGATCGTCTCAGGGTTTGGATCGTGGCGCCTTTGCCCGAAGCTCTGCTTCTGGGCTGCGCTGAATTGCAACAAGCTGTACCTTTGTACTGGCGGTTTGACCCGTTGTCATAAGCTCACACTTTCAATGGGGACGTCGGTCAGGATGGGCTTACCACAAATCAATCTATACACTTTGACCTCCAATCGAGCAGGACTACCCCCTGAACTTAA
OTU 274	235	Ascomycota	Pezizomycotina	Leotiomycetes	Leotiomycetidae	Helotiales			Helotiales	-	-	-	-		UDB031211	SH1543151.08FU	326.0	92.92	AACGCACATTGCGCCCCGTGGTATTCCGCGGGGCATGCCTGTTCGAGCGTCATTTAAACCAATCCAGCTTGCTGGGTCTTGGGCTATCGCCTCCGGGCGGGCCTCAAAATCAGTGGCGGCGCCACCCGGCTCTAAGCGTAGTAATACTTCTCGCTACAGGGCTCCGGGTGGAAGCTGGCCAACAACTCCCAATTTTCAAAGGTTGACCTCGGATCAGGTAGGGATACCCGCTGAACTTAA
OTU 275	233	Ascomycota	Pezizomycotina	Eurotiomycetes	Eurotiomycetidae	Eurotiales	Aspergillaceae	Penicillium	Penicillium spinulosum	Saprotroph	Undefined Saprotroph	Possible	Microfungus		UDB035661	SH1529988.08FU	423.9	99.21	AACGCACATTGCGCCCCCTGGTATTCCGGGGGGCATGCCTGTCCGAGCGTCATTGCTGCCCTCAAGCACGGCTTGTGTGTTGGGCTCCGTCCCCCCGGGGACGGGCCCGAAAGGCAGCGGCGGCACCGAGTCCGGTCCTCGAGCGTATGGGGCTTTGTCACCCGCTCTGTAGGCCCGGCCGGCGCCAGCCGACAACCAATCATCCTTTTCAGGTTGACCTCGGATCAGGTAGGGATACCCGCTGAACTTAA
OTU 276	231	Basidiomycota							Basidiomycota	-	-	-	-		UDB031946	SH1562644.08FU	104.6	79.74	AACGCACCTTGCGCTTCTTGGTATTCCAAGGAGCATGCCTGTTTGAGTGTCATGAAGCTCTCAGCCCCTCGCTTTTTTCTCATCAGAAAGGCCTCGGGTTGGACTTTGGGGGCTTGCCGAGGGCTCAGCCCTCTGCTCCCCTTGAAATGCATTAGCTGGGTAGGTCGCTTCCGCGGTCAATTGGCGTGATAGTGTTATCTGCGTCAATGTTCGCCGTCTTAGGACGGCGGCTGCGAGGCTTCCTCGACTGGCTTCTAACCGTCCTCACGGACAAACCAACTCTTTTGACATCTGGCCTCAAATCAGGTAGGACTACCCGCTGAACTTAA
OTU 277	230	Basidiomycota	Agaricomycotina	Agaricomycetes	Agaricomycetes sbc Incertae sedis	Tremellodendropsidales	Tremellodendropsidaceae	Tremellodendropsis	Tremellodendropsis sp. 1	Saprotroph	Undefined Saprotroph	Probable	NULL		UDB033429	SH1560239.08FU			AACGCACATTGCGCTCCCTGGTATTCCGGAGAGCACGCCCGTTCCAGAATCAGTAAAACTCTCGCCCACGTTGGGGTGTCTTCGGACCCCGAGCAAGGGTGGACCATGGATTTTTGCGTTTTTGCAATCATCTTAAATTAAATGTATGTACACCAAAGTTCAGTCTTTCGGTTGTCAAAGTGCAACAGATATTTGTCGCCGCTTGGACAGTCGATTGGACGGCTTTGATGGACATGCTTCACATTCACAGCACGGCTTCCGAATCGCAATGATTTTGGGATCCGATAACTTGATCTGGAATCGGGCGGGAAAACCCGCTGAACTTAA
OTU 278	229	Ascomycota							Ascomycota	-	-	-	-		UDB027689	SH1506867.08FU	168.1	78.09	AACGCACATTGCGCCCGTCAGTATTCTGGCGGGCATGCCTGTTCGAGCGTCATTTCGACCCTCAAGCCTTTCTGGTTTGGTGTTGGGGTTTTCTACGGCTTGCCGTAGGCCCCGAAATTCAGTGGCGGGCCCGACCCGACCCTGAGCGCAGTAACTTACTCTCGCTCTGGGCGTCGCGGCGGGCGACCGGCCGTAAAACCCGCAGGTGCCTCCCCCGGCCCTGCACCCCACCAAGGTTGACCTCGGATCAGGTAGGAATACCCGCTGAACTTAA
OTU 279	229	Ascomycota	Pezizomycotina	Dothideomycetes	Pleosporomycetidae	Pleosporales			Pleosporales	-	-	-	-		UDB028324		202.4	81.96	AACGCACATTGCGCCCCTTGGTATTCCATGGGGCATGCCTGTTCGAGCGTCATTTTGTACCCTCAAGCACTGCTTGGTGTTGGGCGTTTGTCCTGCAGAGGACTCGCCTGAAAGCGATTGGCGGCCAACGTAGTCGTGGCAGAGCGCAGCACAATCTCGCGTCTCTCCCCTCTGCGTCGGCGTCCATGAAGCCTACAATCTCAACGTTTGACCTCGGATCAGGTAGGGATACCCGCTGAACTTAA
OTU 280	226	Basidiomycota	Agaricomycotina	Agaricomycetes	Agaricomycetes sbc Incertae sedis	Russulales	Peniophoraceae	Subulicystidium	Subulicystidium perlongisporum	Saprotroph	Undefined Saprotroph	Probable	Corticioid		UDB028355	SH1546036.08FU	449.6	97.19	AACGCACCTTGCGCCCTTTGGTATTCCGATGGGCATGCCTGTTCGAGTGTCTTGAATTCATCGCCGCCTCCGGTTTCGCGACCGGCTGGCGGCGGACTTGGGGGTCTGCCGCGGCGACGCGGCTCCCCTCGAATGCATCGGTGGGGTCTCCGAGCACCCACGGGCGTTGTATTGTCCTCGTCCGACCGGGCCTCGCGTCCCCCGCCTCGACTGCCGTCCGAGCGGCGGTCAAGCACACTTTGAAATCTGACCTCGAATCAGGTAGGACTACCCGCTGAACTTAA
OTU 281	224	Ascomycota							Ascomycota 5	-	-	-	-						AACGCACATTGCGCCTACTGGTATTCCGGTAGGCATGTCTGTCTGAGCGTCAGCAAACACCCCTCAGCTGGGTTTTCTTAGGGAAACTCATGCTGGTCTTGGGCGTCTGGATGATGGAGGCTTGCCTCCCTCGCCTGCCCTAAACTTGCTGCACGACCGCTGGCTTCGGCTGGGTCAATGGAGTGGTGTTACAATCTTCCAGAAGACCTTCTAGAGCTTGGTGGCGTTAAACCTGCCGTCGCCCTCGTGGTGACCGACGTTTTGACCTCAGATCAGATAAGGATACCCGCTGAACTTAA
OTU 282	224	Ascomycota	Pezizomycotina	Pezizomycetes	Pezizomycetidae	Pezizales	Pyronemataceae	Scutellinia	Scutellinia sp.	Saprotroph	Undefined Saprotroph	Probable	Pezizoid		UDB019762	SH1556387.08FU	363.8	93.82	AACGCACATTGCGCCTCCTGGTATTCCGGGAGGCATGCCTGTTCGAGCGTCATTAAAAACCACTCAAGCTCTTTTGCTTGGTATTGGGAGAGGAGTCCGCCTGGCGTTCTCCCCCCCGAAATCCAATGGCGGAAAGCCCCACGTGCCCCGGCGTAGTAAGTTTTCTTTCGCTTGGACTGTGAGGTGATCCTGCCGCAAACCCCCAATTATTCTAGGTTGACCTCGGATCAGGTAGGGATACCCGCTGAACTTAA
OTU 283	222	Basidiomycota	Agaricomycotina	Agaricomycetes	Agaricomycetidae	Agaricales	Tricholomataceae	Mycena	Mycena leptocephala 1	Pathotroph-Saprotroph	Leaf Saprotroph-Plant Pathogen-Undefined Saprotroph-Wood Saprotroph	Probable	Agaricoid		UDB022024	SH1547344.08FU			AACGCACCTTGCGCCCTTTGGTATTCCGAAGGGCATGCCTGTTTGAGTGTCATTAAATTATCAACCTTGTTCGCTTTTACGAGCTTGAGCGAGGCTTGGATGTGAGGGCTTGCTGGCTTCCTTCAGTGGATGGTCTGCTCCCTTTAAATGCATTAGTGGGATCTCTTGTGGACCGTCACTTGGTGTGATAATTATCTATGCCATTTGACTGTGAAGCAAAATTATGGGAACCTGCTTATAACCGTCTCGCAAGGGACAATTTAATTGACTATTTGACCTCAAATCAGGTAGGACTACCCGCTGAACTTAA
OTU 284	221	Ascomycota							Ascomycota	-	-	-	-		UDB022877	SH1505108.08FU	85.7	85.88	AACGCACATTGCGCCCTTTGGTATTCCGAAGGGCATGCCTGTCTGAGCGTCAATAATAAAATCAAACCTAGGTTTGGTGTTGGGAGAAGTGGCAATGCCTCTCTCCTTTAAGCTATTGGCGACACTATTTCAGCTTGTAAGACGTAGTAAGTAATTTCTCGTTAAAGCTTCTGTATATAGATGTCTGCCAACTGAATATTTTATTTTAGCACTTGACCTCAGATCAGGTAGGGATACCCCCTGAACTTAA
OTU 285	215	Basidiomycota	Agaricomycotina	Agaricomycetes	Agaricomycetidae	Agaricales	Strophariaceae	Tubaria	Tubaria furfuracea	Saprotroph	Leaf Saprotroph-Wood Saprotroph	Probable	Agaricoid		UDB036977	SH1649963.08FU	514.9	100.0	AACGCACCTTGCGCTCCTTGGTATTCCGAGGAGCATGCCTGTTTGAGTGTTATTAAATTCTCAACCTATCAACTTTTCACGAAGCTGGTATGGCTTGGATATGGAGGTTTGCAGGTTTCTAACGAAGTCAGCTCCTCTGAAATGCATTAGCGGTACCCGTGCGGAATCGTCTATTGGTGTGATAATATCTACGCCGTGGACATCTGCTTTATATGGGTTGTGCTGCTTATAACCGTCCCTCTGTGGACAATTTATGACAATTTAACCTCAAATCAGGTAGGACTACCCGCTGAACTTAA
OTU 286	215	Ascomycota	Pezizomycotina	Leotiomycetes	Leotiomycetidae	Helotiales	Dermateaceae		Dermateaceae	Pathotroph-Saprotroph	Plant Pathogen-Plant Saprotroph	Probable	Microfungus		UDB034362	SH1545937.08FU	269.4	88.07	AACGCACATTGCGCCCTTTGGTATTCCGAAGGGCATGCCTGTTCGAGCGTCATTATAACCACTCAAGCCTTTGCTTGGTCTTGGGGCTCCCGATTTCGGGGCTCTTAAAATCAGTGGCGGTGCTTCTGAGCTCTACGCGTAGTAATACTCCTCGCGTCTGAACCTCACCAGTGTCTTGCCAGTAACCCCCAATTTTTTACAGGTTGACCTCGGATCAGGTAGGGATACCCGCTGAACTTAA
OTU 287	213	Mortierellomycota	Mortierellomycotina	Mortierellomycetes	Mortierellomycetes	Mortierellales	Mortierellaceae	Mortierella	Mortierella sp.	Saprotroph-Symbiotroph	Endophyte-Litter Saprotroph-Soil Saprotroph-Undefined Saprotroph	Possible	Microfungus		UDB027923	SH1529195.08FU	559.5	99.1	AACGCATATTGCGCTCTCTGGTATTCCGGAGAGCATGCTTGTTTGAGTATCAGTAAACACCTCAAATCCCTCTACTTGTTGGAGGAATTTGGACTTGAGCAATCCCAACTTTTCGAAAGAGAAGGCGGGTTGCTTGAAATGCAGGTGCAGCTAGATTCTTTCTTCTGAGCTATAAGCATACTTATTTAATCCCGTCAAACGGATTATTACTTTTGCTGCAGCTAACATAAAGGTTGAAGAGTCGCTATGGCTGACTGATGCAGGATTTAACATTTCGCGCAAGCGATTTGTAAACTCGATCTCAAATCAAGCAAGACTACCCGCTGAACTTAA
OTU 288	212	Mucoromycota	Mucoromycotina	Mucoromycetes	Mucoromycetes	Mucorales			Mucorales	Saprotroph	Undefined Saprotroph	Possible	Microfungus		UDB035691	SH1584792.08FU	200.7	80.14	AACGCAACTTGCGCTCATTGGTATTCCAATGAGCACGCCTGTTTCAGTATCAAAACAAACCCTCTATCCAACATTTTTGTTGAATAGGAATATTGAGAGTCTCTTGATCTATTCTGATCTCGAACCTCTTGAAATGTACAAAGGCCTGATCTTGTTTGAATGCCTGAACTTTTTTTTAATATAAAGAGAAGCTCTTGCGGTAAACTGTGCTGGGGCCTCCCAAATAATACTCTTTTTAAATTTGATCTGAAATCAGGCGGGATTACCCGCTGAACTTAA
OTU 289	212	Ascomycota	Pezizomycotina	Dothideomycetes	Pleosporomycetidae	Pleosporales			Pleosporales	-	-	-	-		UDB025129	SH1635394.08FU	233.3	84.11	AACGCACATTGCGCCCCTTGGTATTCCATGGGGCATGCCTGTTCGAGCGTCATTTGTACTCTCAAGCCTTGCTTGGTGTTGGGTGTTTGTCTCTGCTTAGCCTAGACTCGCCTTAAATATATTGGCAGCCGGTATATTGGTTTGAAGCGCAGCACATTTGCAATTCGAGCCTGTTATTACTAGCATCCATGAAGATTATTAACACTTTTGACCTCGGATCAGGTAGGGATACCCGCTGAACTTAA
OTU 290	211	Basidiomycota	Agaricomycotina	Tremellomycetes	Tremellomycetes sbc Incertae sedis	Tremellales			Tremellales	Pathotroph-Saprotroph-Symbiotroph	Fungal Parasite-Undefined Saprotroph	Possible	Tremelloid-Yeast		UDB019411	SH1517361.08FU	204.1	80.87	AACGCACCTTGCGCCTTTTGGTATTCCGAAAGGCATGCCTGTTTGAGTGTCATGAAATCTCAATCCCCCTGGGTTTATGATCTGGGTTGGGACTTGGACTTGGGTGCTGCCGGTTACATGGCTCGCCTCAAATGACTTAGTGGATCTCTCTGCATCCGTGACAGACGTAATAAGTTTCGTCTTGTCCCTTGCTGTCTGAGTCTGCTCCTAACCTGCCATTGTGCACTTTTAGACTCTGACCTCAAATCAGGTAGGACTACCCGCTGAACTTAA
OTU 291	210	Ascomycota	Pezizomycotina	Sordariomycetes	Hypocreomycetidae	Hypocreales	Bionectriaceae		Bionectriaceae	Saprotroph	Undefined Saprotroph	Possible	Microfungus		UDB024266	SH1513388.08FU	310.6	88.89	AACGCACATTGCGCCCGCTAGTATTCTGGCGGGCATGCCTGTCTGAGCGTCATTTCAACCCTCGCCCCCGGCTTTTGCTGGGAGCGGTGTTGGGGATCGGCCGCCCGTCACTGGGAGGCCGGCCCCGAAATAGAGTGGCGACCACGCCGTGTGCTCCTCTGCGTAGTAGTAAATCACCTCGCAGGCGGACAGCGGTGCGGCCTGCCGTAAAACCCCCAACTCTTTCTGGTTGACCTCAGATCAGGTAGGAATACCCGCTGAACTTAA
OTU 292	208	Ascomycota	Pezizomycotina	Dothideomycetes	Pleosporomycetidae	Pleosporales			Pleosporales	-	-	-	-		UDB028324		231.6	84.25	AACGCACATTGCGCCCCTTGGTATTCCATGGGGCATGCCTGTTCGAGCGTCATTTGTACCCTCAAGCTCTGCTTGGTGTTGGGTGTTTGTCCCGCCTTCGCGCGTGGACTCGCCTTAAAGTGATTGGCAGCCGGAATAATTCTGGGGAACGCAGCACAACTGCAGCCTCCATTTTACGCCGAGCGTCCAGTAAGCCTTTTTTCAACGTTTGACCTCGGATCAGGTAGGGATACCCGCTGAACTTAA
OTU 293	206	Ascomycota	Pezizomycotina	Sordariomycetes	Hypocreomycetidae	Hypocreales			Hypocreales	Saprotroph	Undefined Saprotroph	Possible	Microfungus		UDB035685	SH1552440.08FU	233.3	82.29	AACGCACATTGCGCCCGCCAGTACTCTGGCGGGCATGCCTGTTCGAGCGTCATTTCAACCCTCGAGCCCCCGGGCTCGGTGTTGGGGATCGGCACAAGGCGGAGGCTCCCCCGGGAGCCCCCCCGCCCGCCGTCCCCCAAATGCAGTGGCGGTCACGTCGCGGCCCCCCGTGCGTAGTAGCAACACCTCGCACCGGAGCCCGTCGTGCCCACGCCGTAAAACCCCCGACTTTTACAAGGTTGACCTCGAATCAGGTAGGACTACCCGCTGAACTTAA
OTU 294	204	Ascomycota	Pezizomycotina	Dothideomycetes	Pleosporomycetidae	Pleosporales			Pleosporales	-	-	-	-		UDB025129	SH1635394.08FU	212.7	82.75	AACGCACATTGCGCCCCTTGGTATTCCATGGGGCATGCCTGTTCGAGCGTCATTTGTACCCTCAAGCTATGCTTGGTGTTGGGTGTTTGTCCTTTGCTTTATTGCTTGGACTCGCCTTAAAATAATTGGCAGCCATTGTTTTGGTAGAAAGCGCAGCACATTTTGCAATTTCCTCCAGGAGTATTAGCGACCAACAAGCCTTTTTAACACTTTTGACCTCGGATCAGGTAGGGATACCCGCTGAACTTAA
OTU 295	204	Ascomycota	Pezizomycotina	Sordariomycetes	Hypocreomycetidae	Hypocreales			Hypocreales	Saprotroph	Undefined Saprotroph	Possible	Microfungus		UDB023675	SH1568542.08FU	207.6	81.65	AACGCACATTGCGCCCGCCAGCACTCTGGCGGGCATGCCTGTCCGAGCGTCATTTCAACCATCGGGACCCCCTTGGGGGACCTGGCGTTGGGGGACGGCGACCCCAGTGGCCGCCGCCCCCGAAATACAGTGGCTGCCCTCCGCGGGTGACCCTGCGCAGTAGTGATACCTCGCAGCGGCTCCAGCGGTGCGAACACGCCGTAAAACCCCCGACTTTACCAGGTTGACCTCGGATCAGGTAGGAATACCCGCTGAACTTAA
OTU 296	203	Ascomycota	Pezizomycotina	Sordariomycetes	Xylariomycetidae	Xylariales	Xylariaceae	Xylaria	Xylaria compuncta 1	Saprotroph-Symbiotroph	Endophyte-Undefined Saprotroph-Wood Saprotroph	Probable	Xylarioid		UDB033803	SH1527330.08FU			AACGCACATTGCGCCCGGTAGTAATCTGCCGGGCATGCCTGTCCGAGCGTCATTTCTCCCCTCGAGCGCGGCTTCACGGCCTGTCGCTCGGTGTTGGGGCGCTACGGTGGGAGCCCCGCGCTCCCCCGTAGGCCCCGAAATGTAGTGGCGGTCCCGCCGCGGCGCCCCCTGCGTAGTAGTCTTACAACTCGCATCGGGACCCGGCGGAGGCCAGCCGTCAAACCCCCAACTTCAATAGTTTGACCTCGGATCAGGTAGGGTTACCCGCTGAACTTAA
OTU 297	203	Ascomycota	Pezizomycotina	Dothideomycetes	Pleosporomycetidae	Pleosporales			Pleosporales	-	-	-	-		UDB028324		236.8	84.86	AACGCACATTGCGCCCCTTGGTATTCCATGGGGCATGCCTGTTCGAGCGTCATTTGTACCCTCAAGCTCTGCTTGGTGTTGGGTGTTTGTCTACTACCGTAGACTCGCCTTAAAGTAATTGGCAGCCAGTGTTTTGGTATTGAAGCGCAGCACATTTTGCGCCTCTAGCCTAGAATACTCGCGTCCAGTAAGTCTTTTCCACTTTTGACCTCGGATCAGGTAGGGATACCCGCTGAACTTAA
OTU 298	202	Chytridiomycota							Chytridiomycota 1	-	-	-	-						AACGCACATTGCACTCTGTTTCGGCAGAGTATGCCTGTTTGAGAATCTATAGTATTCATTTTCCAACTTGGGTATTTATACCTAGGAAGGAGAGATTTGAGGCGTCGCACTAACCCTGCGTGCCTTTAAAACTATAGCTGCTGGATACTGTCAAGTAACGGAAAAGTATGTGTATGGGACTTCGGTTTCTCTAATACCAAGTACGGGTGATGGTGCTTGTCCGGCACTCAACTATTAAAGTTGGCCTTTGGGCTAACTTGAACCATGGTCTCAAATCAGGCAGGAAGACCCGCTGAACTTAA
OTU 299	198								Fungi 5	-	-	-	-						AACGCATATTGCACCCGACAGGCTCGCTTGTCGGGTCTGCCTGTTTGAGTATCAGATCGGACCCAGCAGCCGACGACGGGGGCGTGGAACAGGGTTTTGCGACTCTGCTTTGCGCATCCGCGTCGACTAGCCGGTGCTCGCTGCGCAGCAATGTGCGGCGGAAATGGGGTTTTGGGGGCGCGCTCGCGCAACCCCATTCCCTGAAATGTATTGGCCGACCGGCGCATCCTCGATGTCGCTGCGCTTGGACTGCGGGCCGTTTAGCAATGTTAATCATCCGCAAGGGTGTCTTTGTTAAGTTGCCGGGTTATTCAACGAGCGTGGCGCGATGTCCAAACCGACCACCCTTGCAAATGCACGAAAGTGTGTGCGCAAACCGCAGCGCGGGAAACCGCGTTT…
OTU 300	198	Ascomycota							Ascomycota	-	-	-	-		UDB017872	SH1565390.08FU	87.4	89.19	AACGCACATTGCACCCTCTGGTATTCCGGGGGGTATATCTGTCCGAGCGTCATTACAACCTTAAAGCCCGGCTTTTTATTGGATTCTAGTTCTGCTTCGGCGGGACAGGTCCGAAATGGATTAATGACGTCGCGATTACCACGGAATCGAGCGAATGGAATCATTAACGCTCTGATTTGAAGTGGCCGACGGTCTTCTGAAGCGGTCCTTTTGGATCGTCTTTTTAACGGTTGACCTCGGATCAGATAAGGATACCCGCTGAACTTAA
OTU 301	197	Ascomycota							Ascomycota	-	-	-	-		UDB034364	SH1523863.08FU	152.6	78.12	AACGCACATTGCGCCCGCCAGCACTCTGGCGGGCATGCCTGTTCGAGCGTCATTTCAACCCTCAAGCCCAGCTTGGTGTTGGGGCCCTACGTTTGACGTAGGCCCTTAAATGTAGTGGCGGACCCTCCCGGAGCCTCCTTTGCGTAGTAACACAACGTCTCGCACTGGGATCCGGAGGGACTCCCGCCGTAAAACCACCAAACTTTTACAGGTTGACCTCGGATCAGGTAGGAATACCCGCTGAACTTAA
OTU 302	196	Ascomycota	Pezizomycotina	Dothideomycetes	Pleosporomycetidae	Pleosporales			Pleosporales	-	-	-	-		UDB025129	SH1635394.08FU	217.9	82.95	AACGCACATTGCGCCCCTTGGTATTCCATGGGGCATGCCTGTTCGAGCGTCATTTGTACCCTCAAGCTTTGCTTGGTGTTGGGCGTCTTGTCTTTTATTAGACTCGCCTTAAAGTCATTGGCAGCCAGTGTTTTTGGTAGTAAGCGCAGCACATTTTGCGTCTTAGTCCTTGAATCGTGGCATCCATGAAGCCTCTTTTTCACTTTTGACCTCGGATCAGGTAGGGATACCCGCTGAACTTAA
OTU 303	195	Ascomycota							Ascomycota	-	-	-	-		UDB025365	SH1567976.08FU	138.9	76.58	AACGCACATTGCGCCCGGCAGTAATCTGCCGGGCATGCCTGTCCGAGCGTCATTTCACCCCTCGAGCCGCTTTTAGTGGATCGGTGTTGGGGCACTACGGTAAAACGTAGGCCCCGAAATGAAGTGGCGGTCCCGCCGCGGTGCCCCCATGCGTAGTAACGTTTAGTCTCGCATCGGGTCCCGGCGGAGGCCTGCCGTCAAGCCTTTTATTCTCAGAATAGTTTGACCTCGGATCAGGTAGGGTTACCCGCTGAACTTAA
OTU 304	195	Ascomycota	Pezizomycotina	Dothideomycetes	Dothideomycetidae	Capnodiales	Mycosphaerellaceae		Mycosphaerellaceae	Pathotroph-Saprotroph	Plant Pathogen-Undefined Saprotroph	Probable	Microfungus		UDB020921	SH1645411.08FU	264.2	87.4	AACGCACATTGCGCCCTCTGGTATTCCGGAGGGCATGCCTGTTCGAGCGTCATTTCACCACTCAAGCCTGGCTTGGTATTGGGCGCCGCGGTGTTCCGCGCGCCTCAAAGTCTCCGGCTGAGCTGTCCGTCTCCAAGCGTTGTGATTTCATTAATCGCTTCGGGGTGCGGGCGGCCGCGGCCGTTAAATCTTTCACAAGGTTGACCTCGGATCAGGTAGGGATACCCGCTGAACTTAA
OTU 305	193	Basidiomycota	Agaricomycotina	Agaricomycetes	Agaricomycetidae	Agaricales	Psathyrellaceae	Psathyrella	Psathyrella sp.	Saprotroph	Wood Saprotroph	Probable	Agaricoid		UDB018029	SH1508493.08FU	465.1	96.97	AACGCACCTTGCGCTCCTTGGTATTCCGAGGAGCATGCCTGTTTGAGTGTCATTAAATTCTCAACCTCACCAGTTTTGTTATGAGACTGTGTAAGGCTTGGATGTGGGAGTTTATGCAGGCTGCCTCTGTGCGGTCTGCTCTCCTGAAATGCATTAGCGAGTTCGGACTGGGCTCCGTCTATTGGTGTGATAATTATCTACGCCGTGGATTGGGCTTAGACTTGCTTCTAACCGTCCGTAAGGACAATCTTTGACAATTTGACCTCAAATCAGGTAGGACTACCCGCTGAACTTAA
OTU 306	191	Ascomycota	Pezizomycotina	Dothideomycetes	Pleosporomycetidae	Pleosporales	Leptosphaeriaceae		Leptosphaeriaceae	Pathotroph-Saprotroph	Plant Pathogen-Wood Saprotroph	Probable	Microfungus		UDB025129	SH1635394.08FU	262.5	86.15	AACGCACATTGCGCCCCTTGGTATTCCATGGGGCATGCCTGTTCGAGCGTCATTTGTACCCTCAAGCACTGCTTGGTGTTGGGTGTTTGTCCTGCCTCTGTGTGTGGACTCGCCTTAAAATGATTGGCAGCCGGCGTATTTGCCTTGGAGCGCAGCACAATTCGCGCTTTAGAGCCTATTACGTTGGCATCCATCAAGCCTTTTTTATACACTCTTGACCTCGGATCAGGTAGGGATACCCGCTGAACTTAA
OTU 307	191	Ascomycota	Pezizomycotina	Leotiomycetes	Leotiomycetidae	Helotiales	Helotiaceae	Crocicreas	Crocicreas furvum 1	Saprotroph	Undefined Saprotroph	Probable	Pezizoid		UDB003014	SH1573385.08FU			AACGCACATTGCGCCCCTTGGTATTCCGAGGGGCATGCCTGTCCGAGCGTCATTACAACCCCTCCAGCGTGCTGGGTCTTGGGCCTCGCCTCCGGGCGGGCCTTAAAATCAGTGGCGGCCCTATCAGGCCCTGAGCGTAGTAACTTCTCTCGCTACAGGGCCGCGGTAGGCGCTAGCCAGCAACCCCCCCTTCTTTCTAATGGTTGACCTCGGATCAGGTAGGGATACCCGCTGAACTTAA
OTU 308	189	Ascomycota	Pezizomycotina	Eurotiomycetes	Eurotiomycetidae	Eurotiales	Aspergillaceae		Aspergillaceae	Saprotroph	Undefined Saprotroph	Possible	Microfungus		UDB035689	SH1529988.08FU	267.7	87.01	AACGCACATTGCGCCCCCTGGTATTCCGGGGGGCATGCCTGTCCGAGCGTCATTGCAACCCTCAAGCGCGGCTTGTGTGTTGGGCCTCGTCCCCTGTGGACGTGCCCGAAATGCAGTGGCGGTACCGTGCTCCGGTGCCCGAGCGTATGGGCTTATCACCCGCTCTGAGGCCCGGCCGGTGCCTGCCGACTTGGTGAACTTCTTTTCAGGTTGACCTCGGATCAGGTAGGGATACCCGCTGAACTTAA
OTU 309	185	Ascomycota	Pezizomycotina	Sordariomycetes	Hypocreomycetidae	Hypocreales	Hypocreaceae		Hypocreaceae	Saprotroph	Undefined Saprotroph	Possible	Microfungus		UDB025365	SH1567976.08FU	260.8	85.04	AACGCACATTGCGCCCGCGAGTATTCTCGCGGGCATGCCTGTCCGAGCGTCATTTCAACCCTCAGGGCCCGCCTGCTTCGGCAGGCGCGGCGCTGGTGTTGGGGATCGGCTTCACTGCCGTCCCCCAAATACAGTGGCGGTCTCGCTGCAGCCTCCCCTGCGTAGTAGCAACACTCGCATGCGGAGCGCGGCGCGGCCACGCCGTAAAACCCCCGACTTTCTGAACGTTGACCTCGGATCAGGTAGGAATACCCGCTGAACTTAA
OTU 310	184	Ascomycota							Ascomycota	-	-	-	-		UDB019762	SH1556387.08FU	161.2	77.9	AACGCACATTGCGCCTCCTGGTATTCCGGGAGGCATGCCTGTTCGAGCGTCATTAAAATCACTCAAGCTTAGGTTTACCTATTGCTTGGTCTTGGAGATGGAAGCCAATTTATTGGAATCCTCTTCGAAATTCAATGGCGAAGACCCTTGCTCTCCCAAGTGTAGTAATAACTTATGTCACTGAAGGAAGCGAGAAATCTTCTGCCGTAACCCCCATATTTTCTATGATTGACCTCGGATCAGGTAGGGATACCCGCTGAACTTAA
OTU 311	184	Ascomycota	Pezizomycotina	Sordariomycetes	Sordariomycetidae	Sordariales			Sordariales	-	-	-	-		UDB027689	SH1506867.08FU	223.0	82.95	AACGCACATTGCGCCCGCCAGCATTCTGGCGGGCATGCCTGTCCGAGCGTCATTTCAACCCTCAAGCCCTGCTTGGTGTTGGGGCACTACGCGCGAGCGTAGGCCCTCAAAATTAGTGGCGGACCCGCTGGAGGTCCGGGCGTAGTAATACATCTCGCCCGAGGTCCCCAGCGTGCCCCTGCCGTTAAACCCCCAAATTTACAGAAGGTTGACCTCGGATCAGGTAGGAATACCCGCTGAACTTAA
OTU 312	182	Ascomycota	Pezizomycotina	Eurotiomycetes	Eurotiomycetidae	Eurotiales	Aspergillaceae	Penicillium	Penicillium sp.	Saprotroph	Undefined Saprotroph	Possible	Microfungus		UDB027985	SH1529996.08FU	343.2	92.28	AACGCACATTGCGCCCCCTGGTATTCCGGGGGGCATGCCTGTCCGAGCGTCATTACTGCCCTCAAGCCCGGCTTGTGTGTTGGGTCCCGTCCTCCAATTCTGGGGGACGGGCCCGAAAGGCAGCGGCGGCACCGAGTCCGGTCCTCGAGCGTATGGGGCTTTGTCACCCGCTCTGTAGGCCCGGCCGGCGTTTGCCAACCAACCCAAATTTTTATTCAGGTTGACCTCGGATCAGGTAGGGATACCCGCTGAACTTAA
OTU 313	179	Ascomycota	Pezizomycotina	Orbiliomycetes					Orbiliomycetes 1	-	-	-	-		UDB024497	SH1524784.08FU			AACGCACATTGCGCCTCCTGGTATTCCGGGAGGCACGCCCGTTTGAGCGTCAGCTTAACCCCTTCGGACCGCGATTTTTACGACCGCGGCCGGGCCGTTGGCGCGGGGAGGTGACCGCGGCGCTTCGGCGCCGGCAGGTTTCCCCCGCCTAAACGTGGAGAAAGCTAGCTGGCGATAGCCCCAGCCGCGACGACTTGTAGAACTTCCTATTGTCGTACCGCAGCCTGGCGGCCGCCGGCCTTCGAACCCGAGGGGAGCCTTCCGGCCCCCCCAGAACGTTTGACCTCAAATCGGGCGAGGATACCCGCTGAACTTAA
OTU 314	177	Basidiomycota	Agaricomycotina	Agaricomycetes	Agaricomycetidae	Agaricales	Typhulaceae	Typhula	Typhula phacorrhiza	Pathotroph	Plant Pathogen	Probable	NULL		UDB033449	SH1525671.08FU	588.7	100.0	AACGCACCTTGCGCTCCTTGGTATTCCGAGGAGCATGCCTGTTTGAGTGTCATTAATCTCTCAACCTTGCCAGCTTTATTGCTGTTTGCAAGGCTTGGATGTGAGTGTTTGCTGGCTCCTTAGTTGAGTCTGCTCACTTTAAATGTATTAGCGGAACCTCTGCGACCCATCATTGGTGTGATAATCTATCTACGCTATTGGTGCAAGCCTTTTTATTCTTTATTGAACAAAAAGTTGGATCAGCTTCTAACCGTCTTCGGACAACGTCTATTTGGTTTAACAACCTTTTGGATACTTTGACAACTTGACCTCAAATCAGGTAGGACTACCCGCTGAACTTAA
OTU 315	177	Ascomycota	Pezizomycotina	Leotiomycetes	Leotiomycetidae	Helotiales	Dermateaceae	Belonopsis	Belonopsis ericae 1	Saprotroph	Undefined Saprotroph	Probable	NULL		UDB003000	SH1647323.08FU			AACGCACATTGCGCCCCTTGGTATTCCGAGGGGCATGCCTGTTCGAGCGTCATTACAACCAAATCAAGCCCTGCTTGGTGTTGGGGTGCGCGGTACCCGCGGCCCCTAAACGCAGTGGCGGCGCCGGTGGGCTCTAAGCGTAGTAACTTCTCTCGCTATAGGACCCCCCGGTGTCTCGCCAGCAACCCCCCCATTTTTTCAGGTTGACCTCGGATCAGGTAGGGATACCCGCTGAACTTAA
OTU 316	175	Basidiomycota	Agaricomycotina	Agaricomycetes	Agaricomycetes sbc Incertae sedis	Thelephorales	Thelephoraceae	Tomentella	Tomentella sp. 1	Symbiotroph	Ectomycorrhizal	Highly Probable	Corticioid	Short or medium-distance smooth subtype f	UDB023389	SH1502451.08FU			AACGCATATTGCGCTCTTTGGTATTCCAGAGAGCATGCCTGTTTGAGTATTGGTACTATGGGTGAACTTCCTTTGAATTTTCAAAGTAAAATCATTTAAAACCCTATTGAGACATCTTGGCAATCTTTTTTGACAAGTGTCTTAAAATTCAATTTAATTTTCCATGTTCCAGTGGAAGACGACTAGTTTATGGAGTAATATGGTAAGGGTTGCCCCTGACCTGAAAAAGTGCTGTCAAAGGCTCTTTTTCTTACTTTTCTTCTAGTTGTCTTCAGCCTGGAACATGATCTTTGAATGCCCTTGAAGAAGACATTCAAATGTTTTAAGCTCAATCTCAAATCAGGTAGGATTACCCGCTGAACTTAA
OTU 317	175	Ascomycota	Pezizomycotina	Sordariomycetes	Xylariomycetidae	Xylariales	Xylariaceae	Daldinia	Daldinia eschscholtzii 1	Saprotroph	Undefined Saprotroph	Probable	NULL		UDB033905	SH1507868.08FU			AACGCACATTGCGCCCGGCAGCACTCTGCCGGGCATGCCTGTTCGAGCGTCATTCCTCAACCCTCAAATCAACTTTTGTTGGTTTGGTGTTGGAGGTTCTGCGGGACCGTCTTGTTTTCGGACAAGATGCCGCAGCCTCTGAAAAGGAGTGGCGGCCCCGTCGTTTTGGCGCCCCCTGCGAAGTAGTAGCTTTCTACCGCGCTTACGCATTGGGACCCGACGGGTAGCCTGTCGAAACCCCTGACCCTTTTCGAAGGGTCTCTCTTTCGTACGGTTGACCTCGAATCAGGTAGGAATACCCGCTGAACTTAA
OTU 318	175	Ascomycota	Pezizomycotina	Eurotiomycetes	Eurotiomycetidae	Eurotiales	Aspergillaceae	Penicillium	Penicillium sp.	Saprotroph	Undefined Saprotroph	Possible	Microfungus		UDB035689	SH1529988.08FU	370.7	94.88	AACGCACATTGCGCCCCCTGGTATTCCGGGGGGCATGCCTGTCCGAGCGTCATTGCTGCCCTCAAGCCCGGCTTGTGTGTTGGGCCACGTCCCCCCGGGGACGGGCCCGAAAGGCAGCGGCGGCACCGAGTCCGGTCCTCGAGCGTATGGGGCTTTGTCACCCGCTCTTGTAGGCCCGGCCGGCGCCTGCCGACCCCCAACCAAATTTTTCTCAGGTTGACCTCGGATCAGGTAGGGATACCCGCTGAACTTAA
OTU 319	173	Ascomycota	Pezizomycotina	Dothideomycetes	Dothideomycetidae	Capnodiales			Capnodiales	-	-	-	-		UDB035710	SH1572792.08FU	212.7	83.13	AACGCACATTGCGCCCCCTGGTATTCCGGGGGGCATGCCTGTTCGAGCGTCATTTCACCACTCAAGCCTCGCTTGGTATTGGGCGTCGCGAGTCTCTCGCGCGCCTCAAAGTCTCCGGCTGTACGACCCGTCTCCCAGCGTTGTGGCAACTATTTCGCAGTGGAGTTCGGTTCGGCATGGCCGTTAAATCTTTCAAAGGTTGACCTCGGATCAGGTAGGGATACCCGCTGAACTTAA
OTU 320	172	Basidiomycota	Agaricomycotina	Agaricomycetes	Agaricomycetidae	Agaricales	Clavariaceae	Clavaria	Clavaria sp.	Saprotroph	Undefined Saprotroph	Probable	Clavarioid		UDB036897	SH1648144.08FU	435.9	94.14	AACGCACCTTGCACCCTCTGGCATTCCGGAGGGTATGCCTGTTTGAGTGTCATTAATTTCTCAACACAAGGAATTTGTTCCTTGTGCTTGGATATTGAAGGTTTTGCTGGCGCAACAACTGTCAGCTCCTTTTAAATGTATTAGCAGAGCAGTTAGGACTGGCCTCAGTTTGATAAGTTTTTATCTATGCTGTCGCTGGGCTTCCTCTTTGTGCTTAGCTTCAAATTGTCTTTGGACTGCCTCTCCAGGCAATACCATCCTTATTGATCGACCTCAAATCAGGTAGGACTACCCGCTGAACTTAA
OTU 321	170	Ascomycota	Pezizomycotina	Leotiomycetes	Leotiomycetidae	Helotiales			Helotiales 1	-	-	-	-		UDB032140	SH1509644.08FU			AACGCACATTGCGCCCCCTGGTATTCCGGGGGGCATGCCTGTTCGAGCGTCATTATAACCCTCAAGCCCAGCTTGGTGTTGGGGCCTGTCGTCAGACAGCCCTTAAAATCAGTGGCGGTGCCTGCAGGCTCTACGCGTAGTAATTCTTCTCGCGATGGAGCCCTGTAGGATGCTTGCCATCAACCCCCAATTTTCTATGGTTGACCTCGGATCAGGTAGGGATACCCGCTGAACTTAA
OTU 322	168	Ascomycota	Pezizomycotina	Dothideomycetes	Dothideomycetidae	Capnodiales	Mycosphaerellaceae		Mycosphaerellaceae	Pathotroph-Saprotroph	Plant Pathogen-Undefined Saprotroph	Probable	Microfungus		UDB020921	SH1645411.08FU	271.1	88.11	AACGCACATTGCGCCCCTTGGTATTCCGAGGGGCATGCCTGTTCGAGCGTCATTTCACCACTCAAGCCTCGCTTGGTATTGGGCGCCGCGGTGTTCCGCGCGCCTCAAAGTCTCCGGCTGAGCTGTCCGTCTCTAAGCGTTGTGATTTCATTAATCGCTTCGGAGCGCGGGCGGTCGCGGCCGTTAAATCTTTCACAAGGTTGACCTCGGATCAGGTAGGGATACCCGCTGAACTTAA
OTU 323	164	Ascomycota	Taphrinomycotina	Taphrinomycetes	Taphrinomycetidae	Taphrinales	Taphrinaceae	Taphrina	Taphrina sp.	Pathotroph	Plant Pathogen	Probable	NULL		UDB027588	SH1519934.08FU	504.6	100.0	AACGCACATTGCGCCCTCTGGTATTCCGGAGGGCATGCCTGTTTGAGTGTCATTAATCTCTCACAAGACCTTCTGGTCTTGTCGATGTTGGGAGCTGCGACCCCCCAGGGGGACGCTCTCCTCAAATGCATTGGTGCGGCCCGCCGCCCGGTTACACAACGTTCTAGGTTCGTCCAACTCGTTGAAGCCGGCGCAAATCTGGCGCTGCACCTTAAGCCCGCCCTGAGCCTCGAGCTCCTGGCATAACTTCATTTATTGACCTCAGATCAGGTAGGAATACGCGCTGAACTTAA
OTU 324	162	Basidiomycota	Agaricomycotina	Agaricomycetes	Agaricomycetidae	Agaricales	Amanitaceae	Amanita	Amanita sp. 1	Symbiotroph	Ectomycorrhizal	Highly Probable	Agaricoid	Long-distance f	UDB034536	SH1538771.08FU			AACGCATATTGCACCTATTGGTTTTCCAATAGGTATGCTTGTTCGAGCCTCAGTTTTCACCTCATCATCCTTTGGTTTTTAAATTGCTGTAATGGCGCCAAAGTTTGAATGGTTATGAGTGTTCCCTTTTCTAAACGATTGGGTCACTTGAAATTCCTGGTAGTTACAGAGTGGAGATTGCTTCGCATATTTCTGGAATACTCAAAGTACCGCTAAGTTTAAGCCTTCATTGGTTACTCTTTAGCTGGGAAAGTTCTGAAATGAAGCTGTATTCGAAACTTTACCAAACAACATTGATTCTTGGTCGCCGTAGTGCACTAAGTCAATAATTTTGAACCTTGAGCTCGAATCAAGCAAGACTACCCGCTGAACTTAA
OTU 325	162	Basidiomycota	Agaricomycotina	Agaricomycetes	Agaricomycetes sbc Incertae sedis	Cantharellales	Ceratobasidiaceae		Ceratobasidiaceae	Pathotroph-Saprotroph-Symbiotroph	Endomycorrhizal-Plant Pathogen-Undefined Saprotroph	Possible	Microfungus		UDB028157	SH1608945.08FU	389.6	89.63	AACGCACCTTGCGCTCCTTGGTATTCCTTGGAGCATGCCTGTTTGAGTATCATGAAATCTTCAAAGTAAATCTTTTGTTAACTCAATTGGTTCTACTTTGGTATTGGAGGTCTTTGCAGCTTCACACCTGCTCCTCTTCGTTCATTAGCTGGATCTCAGTGTTATGCTTGGTTCCACTCAGCGTGATAAGTTATCTATCGCTGAGGACACTGTAACAGGTGGCCAAGGGAAATGCAGATGAACCGCTTCTAATAGTCCATTGACTTGGACACTATTTTTATGATCTGATCTCAAATCAGGTAGGACTACCCGCTGAACTTAA
OTU 326	162	Ascomycota	Pezizomycotina	Dothideomycetes	Pleosporomycetidae	Pleosporales			Pleosporales	-	-	-	-		UDB025129	SH1635394.08FU	211.0	82.49	AACGCACATTGCGCCCCTTGGTATTCCATGGGGCATGCCTGTTCGAGCGTCATTTGTACTCTCAAGCCTTGCTTGGTGTTGGGTGCTTGTCTTTGCTTTGCGTAGACTCTCCCTAAATACATTGGCAGCCGATATATTGGTTTGAAGCGCAGCACAATTGCTATTCAGGCTTGTTGTATCAGCATCCACAAAGAATGATAACACTTTTGACCTCGGATCAGGTAGGGATACCCGCTGAACTTAA
OTU 327	161	Mortierellomycota	Mortierellomycotina	Mortierellomycetes	Mortierellomycetes	Mortierellales			Mortierellales	-	-	-	-		UDB028005	SH1557019.08FU	252.2	80.45	AACGCATATTGCGCTCTTTGGTATTCCGAAGAGCATGCTTGTTTGAGTATCAGTAAACACCTCACAATCAATTTTTTTTATTAAAATCTTGAGAGTGGACTTGAGTGATCCTTACTCTCCTCTGGAGGGGCAGGTTACTTGAAATGCAGGTGCAGCTGGACTTACAACTGAGCTATAAGCATATCTATTTAGTCTCGTAAAACAGATTATTCATTTTGCTAAAGCTACTCTAAGGTTGTATTTCCATATGGCTGACTGATGCAGGATTCACAGAGTGGACGTCAAAACCCATTTTGTAAACTCGATCTCAAATCAAGCAAGACTACCCGCTGAACTTAA
OTU 328	160	Basidiomycota	Agaricomycotina	Agaricomycetes	Agaricomycetidae	Boletales	Boletaceae	Strobilomyces	Strobilomyces strobilaceus 1	Symbiotroph	Ectomycorrhizal	Highly Probable	Boletoid	Long-distance d	UDB011964	SH1556757.08FU			AACGCATATTGCGCTCTCTGGTACTCCGGAGAGCATGCCTGTTTGAGGGTAATTAATTAAATCTTTGACCTTTCTTGGTCAAGGGATATGGGCATTCCGTGTTTAGCACGGTAGCCTAAAATGTATGGTTAGTCTCATCAAGTTGGGATGTGTAATAATATTTATTTCGCAAAACATTTGATGAATTACCAAGTTTTGATCTATTTAACTCTGTTAGATGTGGTTAAAACAAATATTTTTTGACATTACCTCAAATCAGGTAGGAATACCCGCTGAACTTAA
OTU 329	160	Ascomycota	Pezizomycotina	Sordariomycetes	Sordariomycetidae	Sordariales			Sordariales	-	-	-	-		UDB027689	SH1506867.08FU	200.7	81.2	AACGCACATTGCGCCCGCCAGTATTCTGGCGGGCATGCCTGTTCGAGCGTCATTTCAACCATCAAGCGCCCGCGCTTGTGTTGGAGCCCTGCGGCCGCCGCAGCCTCCCAAACCCAGTGGCGGGCTCGTCGTCGTACCGAGTGCAGTAAACATACCACGCTCCGGGCACGCGACGGGTCACCGGCCGTTAAACCCCCCACATCTCAAGGTTGACCTCGGATCAGGTAGGAATACCCGCTGAACTTAA
OTU 330	159								Fungi 5	-	-	-	-						AACGCATATTGCACCCGACAGGCTCGCTTGTCGGGTCTGCCTGTCTGAGTATCAGTACGGACCCAATCAACAATGAAAGGTTGTTTATATAACCGGACAATGTTGTGTTGGTGCTCACCAGAGGTATTAATATCTTTGGTGGATTTGAGTGTTCAGCCATCATTTTTTGGTTGATCACTTGAAATGTATTGGTGTCGTCTAGCTGACAGTCGCCGCGTAAGCATTGTTAATCATCTTTATTGATGTTCCTTGCTATTACATGGACCAACGACAATAAGCATCTATTAGTACGATCCAAGCACAAACTCCAAATACTTGTATTTAACCATCTTGATCTCAGATCAGGCAGGATGACCCGCTGAACTTAA
OTU 331	159	Ascomycota	Pezizomycotina	Sordariomycetes	Hypocreomycetidae	Hypocreales	Cordycipitaceae	Torrubiella	Torrubiella sp. 1	Pathotroph	Animal Pathogen	Probable	NULL		UDB033201	SH1557178.08FU			AACGCACATTGCGCCCTTTGGTATTCCGAAGGGCATGCCTGTTCGAGCGTCATTTCAAACCTCAAGCGCAAGCTTGGTATTGGGCGTCGTCCTTACCCGGACGTGCCAGAAACCCGTAGGCAGCGGTGCCCGTCTCCCAGCGTAGTCAATTCTACCCGCTCAGGAGCTCGTGGTGTCGCCCGCCGGACAACCCAACACATTTTCTATGGTTTGACCTCGGATCAGGTAGGGATACCCGCTGAACTTAA
OTU 332	158	Ascomycota							Ascomycota	-	-	-	-		UDB028052	SH1627155.08FU	180.1	79.77	AACGCACATTGCGCCCTTTGGCATTCCGAAGGGCATGCCCGTTCGAGCGTCATTACACCAATCAAGCCTGGCTTGGTATTGGGCGTCGGGAGACCCCGCGCCCCTAATTCATCGGCTGGACGGTTCGAATCTCAGCGTTGTGGTCATTCAATTCGCTGGCGAGGACGACCGGACGCGCCGTTAAACCTCTTATCACAGGTTGACCTCGGATCGGGTAGGGATACCCGCTGAACTTAA
OTU 333	157	Basidiomycota	Agaricomycotina	Agaricomycetes	Agaricomycetidae	Agaricales	Bolbitiaceae	Conocybe	Conocybe arrhenii	Saprotroph	Undefined Saprotroph	Probable	NULL		UDB019773	SH1525333.08FU	458.2	99.63	AACGCACCTTGCGCTCCTTGGTATTCCGAGGAGCATGCCTGTTTGAGTGTCATTAAATCATCAAACCTTACAATTTTGAAAGGCTTGGATTTGGGAGCGTTGTTGGCCTTTCTTTTTGGTCAGCTCTCCTTAAATGCATTAGCTAGAAGCTTTTTGTAGCCATCTCTTGGTGTGATAATTATCTATACCATTGAATGTACAAGGCTTTTTGCTTCTAACCAGCGTCTAATGGGACAATTTTGACAATTTGACCTCAAATCAGGTAGGACTACCCGCTGAACTTAA
OTU 334	157	Ascomycota	Pezizomycotina	Sordariomycetes	Hypocreomycetidae	Hypocreales	Nectriaceae	Fusarium	Fusarium sp.	Pathotroph-Saprotroph-Symbiotroph	Animal Pathogen-Endophyte-Lichen Parasite-Plant Pathogen-Soil Saprotroph-Wood Saprotroph	Possible	Microfungus		UDB035713	SH1610165.08FU	355.2	94.69	AACGCACATTGCGCCCGCCAGTATTCTGGCGGGCATGCCTGTTCGAGCGTCATTTCAACCCTCAAGCCCAGCTTGGTGTTGGGAGCTGCAGTCCTGCTGCACTCCCCAAATACATTGGCGGTCACGTCGAGCTTCCATAGCGTAGTAATTTACATATCGTTACTGGTAATCGTCGCGGCCACGCCGTTAAACCCCAACTTCTGAATGTTGACCTCGGATCAGGTAGGAATACCCGCTGAACTTAA
OTU 335	155	Basidiomycota	Agaricomycotina	Agaricomycetes	Agaricomycetes sbc Incertae sedis	Cantharellales	Ceratobasidiaceae		Ceratobasidiaceae	Pathotroph-Saprotroph-Symbiotroph	Endomycorrhizal-Plant Pathogen-Undefined Saprotroph	Possible	Microfungus		UDB017026	SH1554510.08FU	379.3	89.44	AACGCACCTTGCGCTCCTTGGTATTCCTTGGAGCATGCCTGTTTGAGTATCATGAAATTATCAAAACATACCTTTTGTTGATTCAACTGGTTTATTGTTTTGGACTTGGAGGTCTTGCGGATTCACCTCTGCTCCTCTTAAAAACATTAGCTGGATCTCAGTGAGCTCGGTTCCACTCGGCGTGATAAGTATCACTCGCTGAGGACACCCGTAAAAAAGGTGGCCGGGGTTTCAGATGAACCGCTTCTAATAGTCCATTGAATTGGACAAACATACTTTATGATCTGATCTCAAATCAGGTAGGACTACCCGCTGAACTTAA
OTU 336	155	Ascomycota							Ascomycota	-	-	-	-		UDB020921	SH1645411.08FU	92.5	87.95	AACGCACATTGCGCCCTTTGGTATTCCGAAGGGCATGCCTGTCTGAGCGTCAATAAATCAATCAAACCTTGGTTTGGTATTGGGAGAAGTGGCATTGCCTCTCTCCTTTAAGCTATTGGCGACGCTATTTCAGCTTGTAAGATGTAGTAAGTAATTTCTCGTCAAAGCAACTGGATGGATGTCTGCCAAATGAACGATTTATTTAACAGCTTGACCTCAGATCAGGTAGGGATACCCCCTGAACTTAA
OTU 337	154	Basidiomycota	Agaricomycotina	Agaricomycetes	Agaricomycetidae	Agaricales	Entolomataceae		Entolomataceae	Pathotroph-Saprotroph-Symbiotroph	Ectomycorrhizal-Fungal Parasite-Soil Saprotroph-Undefined Saprotroph	Possible	Agaricoid		UDB014207	SH1569141.08FU	327.8	87.92	AACGCACCTTGCGCTCCTTGGTATTCCGAGGAGCATGCCTGTTTGAGTGTCATGAAATTCTCAACCTTTCTAGTTTTCTGACTAGTCAGGCTTGGATCATGGAAGTTGCTGGTTCAACGTGAATCAGCTCTTCTTAAATATATTAGCAAAGACTATTGCCGGCCATTTTTGATATGATAATTATCTATATCATTAATGACCAGTTCTCTGTGGTCTTGCTTATAATTGTCTGAAAAGACAATTGGATAACTTTTGACCTCAAATCAGGTAGGACTACCCGCTGAACTTAA
OTU 338	153	Ascomycota;	Pezizomycotina;	Dothideomycetes;	Dothideomycetidae	Capnodiales			Capnodiales	-	-	-	-		UDB020921	SH1645411.08FU	212.7	83.33	AACGCACATTGCGCCCCCTGGTATTCCGGGGGGCATGCCTGTTCGAGCGTCATTTCACCACTCAAGCCTCGCTTGGTATTGGGCGTCGCGAGTCTCTCGCGCGCCTTAAAGTCTCCGGCTGTTTGACCCGTCTCCCAGCGTTGTGGCAACTATTTCGCAGTGGAGTTCGAGTTGGATCGGCCGTTAAATCTTTCAAAGGTTGACCTCGGATCAGGTAGGGATACCCGCTGAACTTAA
OTU 339	153	Ascomycota	Pezizomycotina	Dothideomycetes	Pleosporomycetidae	Pleosporales			Pleosporales	-	-	-	-		UDB028324		238.5	84.71	AACGCACATTGCGCCCCATGGTATTCCATGGGGCATGCCTGTTCGAGCGTCATTTGTACCCTCAAGCTATGCTTGGTGTTGGGTGTTTGTCCTCTCCATTGCGTTTGGACTCGCCTTAAAGCAATTGGCAGCCAGTGTTTTGGTTTTAAGCGCAGCACATTTTGCGTCTTACTCCCTTGAATACTAGCATCCATTAAGCCTTTTTATCACTTTTGACCTCGGATCAGGTAGGGATACCCGCTGAACTTAA
OTU 340	153	Ascomycota	Pezizomycotina	Leotiomycetes	Leotiomycetidae	Helotiales	Hyaloscyphaceae		Hyaloscyphaceae	Saprotroph	Plant Saprotroph-Wood Saprotroph	Probable	Microfungus		UDB019834	SH1648851.08FU	238.5	88.26	AACGCACATTGCGCCCCTTGGTATTCCGAGGGGCATGCCTATTCGAGCGTCATTATCACCCCTCAAGCTCCGGCTTGGTGTTGAGGCCTGCTGTAAAGGCACCCTCTAAAATCAGTGGCAGTGCCGTCAGGCTCTAAGCGTAGTAATTTCATCGCTATAGACCCGAGCGGACCCTCGCCAGAAACCCCCCATTTTTTAATGATTGACCTCGGATTAGGTAGGGATACCCGCTGAACTTAA
OTU 341	152	Mucoromycota	Mucoromycotina	Mucoromycetes	Mucoromycetes				Mucoromycetes	-	-	-	-		UDB035691	SH1584792.08FU	211.0	80.0	AACGCATCTTGCGCTCATTGGTATTCCAATGAGCACGCCTGTTTCAGTATCAGAAACACCCCACATTCAAAATCTTTTTTTTGAATGGAACTGAGAGTTTTTACGGTTTGATTTTTTTGAAGTCAAGCTGTTCTCTTTAAAGATATTAGGCCTGAAATTTTAGTTTTTTTGTTGCCTGAACTTTTTTTTTAATATAAAGGAAAAGCTCTGGTCAATTTTTAAAAAAGCTTATTATGTTGGGGCCTCCCAAATAAATCTCTCTTAAATTTGATCTGAAATCAGGCGGGATTACCCGCTGAACTTAA
OTU 342	151	Basidiomycota	Agaricomycotina	Agaricomycetes	Agaricomycetidae	Agaricales			Agaricales	-	-	-	-		UDB017003	SH1553003.08FU	252.2	82.47	AACGCACCTTGCGCTCCTTGGCATTCCGAGGAGCATGCCTGTTTGAGTGTCATTAAATTCTCAATTCCATAATATTTATTTATTATGGACTTGGATGTGGGAGTGTGCAGGCCCCTCTTGAAGGATCTGCTCTTCTTAAATGCATTAGTCGGACTTGTTGCAACAGTCTGTGGTGTGATAATTATCTACGCCCAGGCCCTGTGCAGTCTTGCGGTCCAGCTTCCAATGGTCCATTCAATTGGACAACTCATTGACAATTTGACCTCAAATCAGGTAGGACTACCCGCTGAACTTAA
OTU 343	149	Chytridiomycota							Chytridiomycota 5	-	-	-	-						AACGCACATTGCGCTTCCTGGTATTCCGGGAAGCATGCTCGTTTCAGAATCATTAAAAATCTGCAAACCAGGCTCTAGAAATGATTTCATCATTTTAGCCGAATAATCGCCTTAGTGCAAGTATGGTGATTATTTTTGCATCGGGGTTAAACCTGAAGCATTGGTGCATGTTGGGCGTATTTGTTAATCCTTTCGGGTTAACAGTCGCTTTAAAATGAGTTTGTGCCCACATGACAGGGATAACCTGGTGGCTTTGAAGCGCTTACAACTCGTTTACGCTTTACTGCTGCTAAAATTTCCTCGTTTTGCGGCGTGCAAATACCACAATTTACACAGTTCTGGCTTTTGCTTCTGGCATGGCTGTTCTGATAATTTGGTCTGAAATCGAGCAAGAAAACC…
OTU 344	149	Ascomycota	Pezizomycotina	Dothideomycetes	Pleosporomycetidae	Pleosporales			Pleosporales	-	-	-	-		UDB025129	SH1635394.08FU	219.6	83.2	AACGCACATTGCGCCCCTTGGTATTCCATGGGGCATGCTTGTTCGAGCGTCATTTGTACTCTCAAGCTTTGCTTGGTGTTGGGTGTTTGTCCTTTCCATTGCGTTTGGACTCGCCTCAAATTCATTGGCAGCCTATATATTGGTTTGAAGCGCAGCACATTTTGCGGTTCTGTCGAATACTATTAGCGTCCATAAAGCACAATTAACACTTTTGACCTCGGATCAAGTAGGGATACCCGCTGAACTTAA
OTU 345	148	Ascomycota	Pezizomycotina	Leotiomycetes	Leotiomycetidae	Helotiales			Helotiales 1	-	-	-	-		UDB032140	SH1509644.08FU			AACGCACATTGCGCCCCTTGGTATTCCGGGGGGCATGCCTGTTCGAGCGTCATTATAACCCTCAAGCCTAGCTTGGTGTTGGAGCATGCTATCTAGCAGCTCTTAAAATTAGTGGCAGTGCCCTTCGGCTCTAAGCGTAGTAACTTTTCTCGCTATAGAACCCGGATGGTACGCGCCAAAACCCCCAACTTTCTATGGTTGACCTCGGATCAGGTAGGGATACCCGCTGAACTTAA
OTU 346	146	Basidiomycota							Basidiomycota	-	-	-	-		UDB018375	SH1650268.08FU	132.0	73.68	AACGCACCTTGCGCTCTTTGGTATTCCGAAGAGCATGCCTGTTTGAGTGTCATGAAAATATCAACCTTGACTTGGGTTTTGTGCTCTAGTCTCGGCTTGGAATTGGGTGCTTGCCGCTTTTACGAGCGGCTCACCTTAAATGTATTAGCTGGATCTGTCTTTGAGACTTGGTTTGACTTGGCGTAATAAGTATTTCGCTAAGGACATTCTTCGGAGTGGCCTCGTTTCTAGGACGCTTGTCCGCTTTCCAATACAAGTTCCACCTCGTGGACATGACTTTTTATTATCTGGCCTCAAATCAGGTAGGACTACCCGCTGAACTTAAGCATATCAATAAGCGGAGGACTCAGAGTCTACATGAGTGTGAGTCATCGAGTCTTTGAACGCAAGTTGCGCCCG…
OTU 347	145	Basidiomycota	Pucciniomycotina	Pucciniomycetes	Pucciniomycetes sbc Incertae sedis	Pucciniales	Pucciniaceae		Pucciniaceae	Pathotroph	Plant Pathogen	Probable	Rust		UDB036432	SH1518788.08FU	308.9	85.67	AACGCATCTTGCGCCTTTTGGTATTCCAAAAGGCACACCTGTTTGAGTGTCATGAAACCCTCTCATTAAACATTTTTTAACTTGTTTAAAATTGTTTAGTGGATGTTGAGTGTTGCTGTCATTAGCTCACTTTAAATATATAAGTCACTTTTCAAATAAGTTGGATTGACTTGGTGTAATAATTTTATCATCACATCAAGGAAAGTAGCAATACTTGCCATCTTGTTTAATATGAGGGACTTCTAAAAACCCCCCTTTTTTTAAAATTTAAGACCTCAAATCAGGTGGGACTACCCGCTGAACTTAA
OTU 348	145	Ascomycota	Pezizomycotina	Leotiomycetes	Leotiomycetidae	Helotiales			Helotiales 1	-	-	-	-		UDB032140	SH1509644.08FU			AACGCACATTGCGCCCCTTGGTATTCCGGGGGGCATGCCTGTTCGAGCGTCATTATAACCCTCAAGCCTAGCTTGGTGTTGGAGCCTGCGTCTCGCAGCTCTTAAAATCAGTGGCAGTGCCCTCTGGCTCTAAGCGTAGTAATTCTTCTCGCTACAGACACCAGAGGGCCCGCGCCAGAACCCCCAATTTCTAGTGATTGACCTCGGATCAGGTAGGGATACCCGCTGAACTTAA
OTU 349	145	Basidiomycota							Basidiomycota	-	-	-	-		UDB019411	SH1517361.08FU	175.0	78.78	AACGCACCTTGCGCCTTTTGGTATTCCGAAAGGCATGCCTGTTTGAGTGTCATGAAATCTCAATCCCGTCTGGTTTATCACCTGGCGTGGACTTGGACCTGGGTGTCTGCCGGTTACACGGCTCGCCTCAAATGACTTAGTAGGATCGCTCGCATCCGTGACAGACGTAATAAGTTTCGTCTTGTCCCTTGCTTGCGTCAAGCCTGCTCAGAACCTGCCTTTGCGCACCTTTTTGACTCTGACCTCAAATCAGGTAGGACTACCCGCTGAACTTAA
OTU 350	144	Basidiomycota	Agaricomycotina	Agaricomycetes	Agaricomycetidae	Agaricales	Typhulaceae	Typhula	Typhula fistulosa 1	Pathotroph	Plant Pathogen	Probable	NULL		UDB033340	SH1525669.08FU			AACGCACCTTGCACTCTTTGGTATTCCGAAGAGTATGTCTGTTTGAGTGTCATGAAACTCTCAACCCCCTTATTTTGTAATGATATAAGTGTGGGCTTGGTTCATGGTTGTTGAAGGCTTAACAGTCTTCTCAACTGAAATACACGAGCTACCTATTTTATAATAGACGGTTTGACTCGGCGTAATAACTATTTCGCTGAGGACGTCCTTTTATAATAGTAAATGGTGCTTCTAATTTAACATCAATTTAAGATTTAGACCTCAAATCAGTCAGGACTACCCGCTGAACTTAA
OTU 351	144	Ascomycota	Pezizomycotina	Sordariomycetes					Sordariomycetes 1	-	-	-	-		UDB024433	SH1648729.08FU			AACGCACATTGCGCCCGCTAGTATTCTGGCGGGCATGCCTGTTCGAGCGTCATTTCAACCATCAAGTCCCCGGGCTTGCGTTGGGGCCCTGCGGCTGCCGCAGGCCCCTAAAACCAGTGGCGGGCTCGCTGTCACACCGAGCGCAGTAGCAATATCTCGCTCTGGGCGTGGCGGGGGGTGCTTGCCGTAAAACACACCACTTTCAGAAGGTTGACCTCGGATCAGGTAGGAATACCCGCTGAACTTAA
OTU 352	144	Basidiomycota	Agaricomycotina	Agaricomycetes	Agaricomycetes sbc Incertae sedis	Trechisporales	Hydnodontaceae	Trechispora	Trechispora sp.	Saprotroph	Wood Saprotroph	Highly Probable	Corticioid		UDB025677	SH1557426.08FU	508.0	99.66	AACGCACCTTGCGCTCCTTGGTATTCCGAGGAGCATGCCTGTTTGAGTGTCTTGAAGTCATCAACCCTTCCCGTTTTGTGCGGGACGCGGTTGGAGCTGGGGGCGTGCGGCCGTGAGGCCGCTCCCTTCAAATGCATCGGTTGGACCTGTGGGTCGAACTCGACTGGGCGTTGTACCATCCTCGCTCTCCCCGAGACGTTCCCCTTCCGTGTCCTTCCACGACCTGCTGTAGAGCGGCGGTCAAAACCAAACTTTGAAATCTGACCTCAAATCAGGTAGGACTACCCGCTGAACTTAA
OTU 353	144	Ascomycota	Pezizomycotina	Leotiomycetes	Leotiomycetidae	Helotiales			Helotiales	-	-	-	-		UDB031207	SH1523059.08FU	338.1	93.78	AACGCACATTGCGCCCCTTGGTATTCCGGGGGGCATGCCTGTTCGAGCGTCATTTATACCAATCTAGCCCGGCTAGGTGTTGGGTTTCGCCGTTTGGCGGGCCTTAAAATTAGTGGCGGTGCTCCTCAGCTCTACGCGTAGTAATTCTTCTCGCTACAGGGTCTTGTGGAGATGCTTGCCAGCAACCCCGAATTTTTCTAGGTTGACCTCGGATCAGGTAGGGATACCCGCTGAACTTAA
OTU 354	144	Ascomycota	Pezizomycotina	Leotiomycetes	Leotiomycetidae	Helotiales			Helotiales 1	-	-	-	-		UDB032140	SH1509644.08FU			AACGCACATTGCGCCCCTTGGTATTCCGAGGGGCATGCCTGTTCGAGCGTCATTATAACCCCTCAAGCTCAGCTTGGTGTTGGGGCCTGCTGTACTGGCAGCCCTTAAAATCAGTGGCGGTGCCATCTGGCTCTAAGCGTAGTAATTCTTCTCGCTATGGAGTCCTGGTGGATGCTTGCCATCAACCCTAAATTTTCTATGGTTGACCTCGGATCAGGTAGGGATACCCGCTGAACTTAA
OTU 355	143	Ascomycota	Pezizomycotina	Sordariomycetes	Hypocreomycetidae	Hypocreales	Hypocreales fam Incertae sedis		Hypocreaceae	Saprotroph	Undefined Saprotroph	Possible	Microfungus		UDB019759	SH1568211.08FU	284.8	86.81	AACGCACATTGCGCCCGCCAGTATTCTGGCGGGCATGCCTGTTCGAGCGTCATTTCAACCCTCGGGCCCCGCATTCGTGCGGGCTCCGGCGTTGGGGACCGGCCTCCGCTTCGGACGGCCGCCCCCGAAACCCAGTGGCGGTCCCGCCGCGGCCTTCTCTGCGTAGTAGCATACACCTCGCACTGGAGAGCGGCGCGGCCACGCCGTAAAAGAAACGAACTTTCTGAAGGTTGACCTCGGATCAGGTAGGAATACCCGCTGAACTTAA
OTU 356	143	Ascomycota	Pezizomycotina	Sordariomycetes	Sordariomycetidae	Diaporthales	Gnomoniaceae	Plagiostoma	Plagiostoma sp. 1	Saprotroph	Undefined Saprotroph	Probable	NULL		UDB034055	SH1596907.08FU			AACGCACATTGCGCCCGGTGGTAATCTGCCGGGCATGCCTGTTCGAGCGTCATTTCTACCCTCAGGCCCTACCGCTTAGGTGGTTCGGGTGCTGGTGTTGGGGCCTGCAGGCCACTGCAGCCTCTAATTCTATCGGCGTACTGGTGTGCGTTGCCCTTTGCGTAGTGGATTTTTTCTTTTCTCGCATCGGGTCGTACCTTGTCCGGCCGCTAAACTTTTTTTAAAAAACCTTTTTAGTTTGACCTCGAATCAGGTAGGGTTACCCGCTGAACTTAA
OTU 357	142	Basidiomycota							Basidiomycota	-	-	-	-		UDB016422	SH1561857.08FU	145.8	75.73	AACGCACCTTGCACCCTTTGGTATTCCGAAGGGTACACCCGTTTGAGTGTCATTGTAATCTCACCTCTTCGGCTTTATTGTCGATCAGTGTGGACTTGGATGTTGCCGTGTAACAAACGGCTCGTCTGAAATGCTTGAGTGTACCCTGCTTTGCGGCGTATTCGGTGTGATAAATCTTCACCGGAGTCTGACTTTCGGGTCGCGCTTGTATTGTGGGCTCTATGCTTTCCAACCGTCCTAACAAGACAATCTTTGACAATTTGACCTCAAATCGGGTGGGACTACCCGCTGAACTTAA
OTU 358	142	Ascomycota	Pezizomycotina	Sordariomycetes					Sordariomycetes 1	-	-	-	-		UDB024433	SH1648729.08FU			AACGCACATTGCGCCCGGCAGTACTCTGCCGGGCATGCCTGTTCGAGCGTCATTTCAACCCTCAAGCCCTGCTTGGTGTTGGGGCCCCACGGCTGCCGTGGGCCCTGAAAGGAAGTGGCGGGCTCGCTACAACTCCGAGCGTAGTAATTCATTATCTCGCTTAGGGCGTTGGGCGGCGCTCCAGCCGTTAAAGAACCATCTTTAACTCAAGGTTGACCTCGGATCAGGTAGGAATACCCGCTGAACTTAA
OTU 359	142	Basidiomycota							Basidiomycota 5	-	-	-	-						AACGCATCTTGCGCTCTTTGGCATTCCGAAGAGCACGCGTATTGGAGTGTCGCAAACCTCTCACACCCCTGGTTTTAATCAGCGTGGTCGTGGACCGTGGCCGTTTGGCCGGCGTCTTGACGTCGGCCCGGCCGAAATACATGCGGAGCATCACTGCTGCCGCGACGACCGAGCGTTGTAGACCCCTCGCTTGATTCGTTGTGAGCGCAGGCTCCCCAACCTTTTAATTCGACCTCCAATTACGTGGGATTACCCGCCGAACTTAA
OTU 360	142	Ascomycota	Pezizomycotina	Leotiomycetes	Leotiomycetidae	Helotiales	Hyaloscyphaceae		Hyaloscyphaceae	Saprotroph	Plant Saprotroph-Wood Saprotroph	Probable	Microfungus		UDB034360	SH1527679.08FU	252.2	86.78	AACGCACATTGCGCCCCTTGGTATTCCGAGGGGCATGCCTGTTCGAGCGTCATAATACCCCATCCAGCTTGCTGGGTCTTGGGCACCGCCGGGAGGCGGGCCTTAAACACAGTGGCGGTACGGCCGGGCTCTAAGCGTAGTACATCATCTCGCTATAGGGTCCCGGGCGGCACCTGCCAGCAACCCCCCCCATTTATTAGGTTGACCTCGGATCAGGTAGGGATACCCGCTGAACTTAA
OTU 361	141	Basidiomycota	Agaricomycotina	Agaricomycetes	Agaricomycetidae	Agaricales	Psathyrellaceae	Psathyrella	Psathyrella sphagnicola 1	Saprotroph	Wood Saprotroph	Probable	Agaricoid		UDB024323	SH1513479.08FU			AACGCACCTTGCGCTCCTTGGTATTCTGAGGAGCATGTCTGTTTGAGTGTCATTAAATTCTCAACTTCATCAGTTTTGTTGTGAAGCTGTGTGAAGCTTGGATTGTGGAGGTTTGCAGAATGCTTTAGAGTGTTTTTGCTCCCCTTAAATAAATTAGTGAGTTTCAACTGGGCTCCATCTATTGGTATGATAATTATCTACACTGTGGATTGGGCTTAGACTTGCTTCTAACTGTCTGAAAGGACAAATTTTGACAATTTGACCTCAAATCAGGTAGGACTACCCGCTGAACTTAA
OTU 362	141	Basidiomycota	Agaricomycotina	Tremellomycetes	Tremellomycetes sbc Incertae sedis	Tremellales			Tremellales	Pathotroph-Saprotroph-Symbiotroph	Fungal Parasite-Undefined Saprotroph	Possible	Tremelloid-Yeast		UDB019411	SH1517361.08FU	202.4	80.65	AACGCACCTTGCGCCTTTTGGTATTCCGAAAGGCATGCCTGTTTGAGTGTCATGAAATCTCAATCCCCTCAGGTTTCTGGTCTGGGGTGGACTTGGACTTGGGTGTCTGCCGTTCCGACGGCTTGCCTCAAATGACTTAGTGGGATCAGTATCCGCGGTTAGACGTAATAAGTTTCGTCTGGCTAGGTGTGACGCCTGCTCACAACCCCTCGCTTTGGCGTTAACATTATTTTTGACTCTGACCTCAAATCAGGTAGGGCTACCCGCTGAACTTAA
OTU 363	141	Ascomycota	Pezizomycotina	Leotiomycetes	Leotiomycetidae	Helotiales			Helotiales 1	-	-	-	-		UDB032140	SH1509644.08FU			AACGCACATTGCGCCCCTTGGTATTCCGGGGGGCATGCCTGTTCGAGCGTCATTATAACCCTCAAGCCTAGCTTGGTGTTGGAGCCTGCCTCTGGGCAGCTCTTAAAATCAGTGGCGGTGCCGTCTGGCTCTAAGCGTAGTAATTTTTCTCGCTACAGAGTCCCGGCGGTTGCTTGCCAACAACCCCAAATTTTCTATGGTTGACCTCGGATCAGGTAGGGATACCCGCTGAACTTAA
OTU 364	140	Ascomycota							Ascomycota	-	-	-	-		UDB028324		197.3	81.75	AACGCACATTGCGCCCCTTGGTATTCCATGGGGCATGCCTGTTCGAGCGTCATTTGTCTCTCAAGCTGTGCTTGGTGTTGGATGTTTGTCCATTCTCTTGTGCCTGGACTCATCTCAAAGCAATTGGCAGCCAGTGTTTTGGTTTACTAGTGCAGCACATTTTGCACTTGTAGCTTAGATACTCGCAACCCACAAGAATTTTTACTCTTGACCTCGGATCAGGTAGGGATACCCGCTGAACTTAA
OTU 365	139	Ascomycota	Pezizomycotina	Eurotiomycetes	Eurotiomycetidae	Eurotiales			Eurotiales	Saprotroph	Undefined Saprotroph	Possible	Microfungus		UDB035661	SH1529988.08FU	238.5	84.71	AACGCACATTGCGCCCCCTGGCATTCCGGGGGGCATGCCTGTCCGAGCGTCATTTCTGCCCTCAAGCACGGCTTGTGTGTTGGGTGTGGTCCCCCTGGGGACCTGCCCGAAAGGCAGCGGCGACGTCCGTCTGGTCCTCGAGCGTATGGGGCTTTGTCACTCGCTCGGGATGGACCTGCGGGGGTTGGTCACCACCATATTTTACCACGGTTGACCTCGGATCAGGTAGGAGTTACCCGCTGAACTTAA
OTU 366	139	Ascomycota	Pezizomycotina	Leotiomycetes	Leotiomycetidae	Helotiales	Sclerotiniaceae	Dumontinia	Dumontinia sp.	Pathotroph	Plant Pathogen	Probable	Microfungus		UDB032998	SH1570091.08FU	367.2	96.25	AACGCACATTGCGCCCCTTGGTATTCCGGGGGGCATGCCTGTTCGAGCGTCATTTCAACCCTCAAGCTTAGCTTGGTATTGAGTCTATGTCAGTAATGGCAGGCTCTAAAATCAGTGGCGGCGCCGCTGGGTCCTGAACGTAGTAATATCTCTCGTTACAGGTTCTCGGTGTGCTTCTGCCAAAACCCAAATTTTTCTATGGTTGACCTCGGATCAGGTAGGGATACCCGCTGAACTTAA
OTU 367	138	Ascomycota	Pezizomycotina	Dothideomycetes	Pleosporomycetidae	Pleosporales			Pleosporales	-	-	-	-		UDB028324		279.7	87.84	AACGCACATTGCGCCCCTTGGTATTCCATGGGGCATGCCTGTTCGAGCGTCATTTGTACCCTCAAGCTCAGCTTGGTGTTGGGCGTTTGTCCTGTCTTTTAGCGCATGGACTCGCCTCAAATCAATTGGCAGCCGGCAATCTGGTGGCAGAGCGCAGCACATTTTGCGCACTTCGCTTTGAATGTCGGCGTCCATGAAGGCTACATTTTTTGCGCTTGACCTCGGATCAGGTAGGGATACCCGCTGAACTTAA
OTU 368	138	Ascomycota	Pezizomycotina	Sordariomycetes					Sordariomycetes 1	-	-	-	-		UDB024433	SH1648729.08FU			AACGCACATTGCGCCCGCCAGTATTCTGGCGGGCATGCCTGTTCGAGCGTCATTTCAACCATCAAGCGCCCCGCTTGTGTTGGGGCCCTGCGGCTGCCGCAGACCCCTAAATCCAGTGGCGGGCTCGTCGTCGTACCGAGTGCAGTAAACATCCTCGCTCAGGGAACGCCGCGGGTCTCTTGCCGTGAAACACCCCCCATATCAAGGTTGACCTCGGATCAGGTAGGAATACCCGCTGAACTTAA
OTU 369	137	Ascomycota	Pezizomycotina	Leotiomycetes	Leotiomycetidae	Helotiales			Helotiales 1	-	-	-	-		UDB032140	SH1509644.08FU			AACGCACATTGCGCCCCTTGGTATTCCGGGGGGCATGCCTGTTCGAGCGTCATTTAAACCCTCAAGCTTAGCTTGGTGTTGGGGCATGCCTATAGGCAGCCCCTAAAATCAGTGGCGGTGCCTGCTGGCTCTAAGCGTAGTAATACTCCTCGCTATAGAGTCCAGCGGTCCACCCGCCAGAACCCCCAATTTTCTATGGTTGACCTCGGATCAGGTAGGGATACCCGCTGAACTTAA
OTU 370	136	Ascomycota							Ascomycota	-	-	-	-		UDB031863	SH1510510.08FU	190.4	79.18	AACGCACATTGCGCCCTATGGTATTCCGTAGGGCATGCCTGTCTGAGCGTCAACTCCCACCCTCTCAAGTCTTTCTTTTGCTAGGAGATTTGGATTGCTTTGAGGAAGTATCATTTTTTTTATGCTGCTCCTCAGAAATTTATAGGCAGTATGGTCAAACCTGAACCAGGCGTAATAATTCTATAAAATCGTCTAATGAAAGGAAAGTCTGTATTAGTCTTTAACCAATTTCTATTTTTTTTTTTGGGTGACCTCAGATCAGGTAGGGATACCCGCTGAACTTAA
OTU 371	136	Ascomycota	Pezizomycotina	Dothideomycetes	Pleosporomycetidae	Pleosporales	Leptosphaeriaceae		Leptosphaeriaceae	Pathotroph-Saprotroph	Plant Pathogen-Wood Saprotroph	Probable	Microfungus		UDB025129	SH1635394.08FU	307.1	89.84	AACGCACATTGCGCCCCATGGTATTCCGTGGGGCATGCCTGTTCGAGCGTCATTTGTACCCTCAAGCCTAGCTTGGTGTTGGGCGTTTGTCTCGCGCTTTTGCGCGTAGACTCGCCTTAAAACAATTGGCAGCCGGCACATTGGCCTGGAGCGCAGCACATTTTGCGCCTCTTGCCCCTGTTGTTAGCACCCATCAAGAACATTTTTGCTCTTGACCTCGGATCAGGTAGGGATACCCGCTGAACTTAA
OTU 372	136	Ascomycota	Pezizomycotina	Sordariomycetes	Hypocreomycetidae	Hypocreales	Cordycipitaceae	Torrubiella	Torrubiella sp. 1	Pathotroph	Animal Pathogen	Probable	NULL		UDB033201	SH1557178.08FU			AACGCACATTGCGCCCTCTGGTATTCCGGGGGGCATGCCTGTTCGAGCGTCATTACAACCCTCAAGCTCTGCTTGGTATTGGGCACTGCAGATTTCTGCAGGCCTTAAAATCAGTGGCGGTGCCATTCGGCTTCAAGCGTAGTAATTCTTCTCGCTTTGGAGACCCGAGTGGTTACTAGCCAACAACCCCCAATTTTTTCAGGTTGACCTCGGATCAGGTAGGGATACCCGCTGAACTTAA
OTU 373	135	Basidiomycota	Agaricomycotina	Agaricomycetes	Agaricomycetes sbc Incertae sedis	Auriculariales	Auriculariaceae	Auricularia	Auricularia sp. 1	Saprotroph	Undefined Saprotroph	Probable	NULL		UDB033855	SH1561134.08FU			AACGCAACTTGCGCTCCTTGGTATTCCATGGAGCATGCCTGTTTGAGTGTCACGTAAACCCTCACCCTTGCGATGTTAAAGTCGTACTGTGGTGGATTTGGATTGTGCCGTAATTGGCTCATCCTGAAATGCATTAGCTTGTGCTTTTTACAGTGCTCGGCATGGTGTGATAATTATCTGCGCCGTCGCCTTAGGCCTGTTCTATATGTGCAGCTTCTAATCGTCCCTTGTGGACAACTTACTTAACACTTTGGCCTCAAATCAGGTAGGACTACCCGCTGAACTTAA
OTU 374	135	Basidiomycota	Agaricomycotina	Agaricomycetes	Agaricomycetidae	Agaricales	Typhulaceae	Typhula	Typhula fistulosa 1	Pathotroph	Plant Pathogen	Probable	NULL		UDB033340	SH1525669.08FU			AACGCACCTTGCACTCTTTGGTATTCCGAAGAGTATGTCTGTTTGAGTGTCATGAAACTCTCAACCCCCTCGTTTTGTAATGAAACGAGCGTGGGCTTGGATTGTGGCGGCTGCCGGCGCAATTGTCGACTCTGCTGAAATACACGAGCTACCCATTTCTGAGAAATAGACGGTTTGACTCGGCGTAATAATATATTTCGCTGAGGACGTCACATTCTCTAACTAGAGGTGCTTCTAATGCGACATCTAAATCTTTAAGCTTTAGACCTCAAATCAGTCAGGACTACCCGCTGAACTTAA
OTU 375	135	Ascomycota							Ascomycota	-	-	-	-		UDB027442	SH1509515.08FU	133.8	77.02	AACGCACATTGCGCCCGCCAGCATTCTGGCGGGCATGCCTGTTCGAGCGTCATTTCAACCCTCAGGCCCTGCCTGGCGTTGGAGGACTGCGCACCGCAGCCTCCCAAAACAAGCGGCGGCGGCGCCCCAAGACCGAACGCAGTAGTTTTCTCTCGTTCTGGGCCTGGGACGTCGTCCTGCCGGAAAACCCCCAACTTTTGCATGGTTGACCTCGAATCAGGTAGGAATACCCGCTGAACTTAA
OTU 376	135	Ascomycota	Pezizomycotina	Sordariomycetes					Sordariomycetes 1	-	-	-	-		UDB024433	SH1648729.08FU			AACGCACATTGCGCCCGCCAGTATTCTGGCGGGCATGCCTGTCCGAGCGTCATTTCAACCATCAAGCCTAGTGCTTGTGTTGGGGCCCCGCGGCTGCCGCGGGCCCTGAAAACCAGTGGCGGGCTCGAAGTCGAACCGAGTGCAGTAAATTTCTTCGCTTGGGAAGGTGACGAGTTCCGGCCGTAAAAAGCCCAACTTTATCAAGGTTGACCTCGGATCAGGTAGGACTACCCGCTGAACTTAA
OTU 377	135	Ascomycota	Pezizomycotina	Leotiomycetes	Leotiomycetidae	Helotiales	Helotiaceae	Bisporella	Bisporella sp.	Saprotroph	Wood Saprotroph	Probable	Microfungus		UDB019757	SH1522953.08FU	300.3	90.83	AACGCACATTGCGCCCCTTGGTATTCCGGGGGGCATGCCTGTTCGAGCGTCATTATAACCCTCAAGCTCCGCTTGGTCTTGGACCCCGCCGGCGACGGCGGGCCCCAAAAACAGTGGCGGCGCCACCTGGCTCTGAGCGTAGTAATACTTCCCGCTACAGAGTCCCGGTGGATGCTGGCCAGAACCCCCAACTTTCTATGGTTGACCTCGGATCAGGTAGGGATACCCGCTGAACTTAA
OTU 378	134	Ascomycota	Pezizomycotina	Sordariomycetes					Sordariomycetes 1	-	-	-	-		UDB024433	SH1648729.08FU			AACGCACATTGCGCCCGCTAGTACTCTAGCGGGCATGCCTGTTCGAGCGTCATTTCAACCCTCAAGCCCTGCTTGGTGTTGGGGCCCTACGGCTGCCGTAGGCCCTGAAAGGAAGTGGCGGGCTCGCTACAACTCCGAGCGTAGTAATTCATTATCTCGCTTAGGGTGTTGTGCGGTGCTCCAGCCGTTAAAGACCATCTTTAACTCAAGGTTGACCTCGGATCAGGTAGGAATACCCGCTGAACTTAA
OTU 379	133	Basidiomycota	Agaricomycotina	Agaricomycetes	Agaricomycetidae	Agaricales	Psathyrellaceae	Coprinellus	Coprinellus micaceus	Saprotroph	Dung Saprotroph-Plant Saprotroph-Wood Saprotroph	Probable	Agaricoid		UDB037668	SH1508477.08FU	513.2	100.0	AACGCACCTTGCGCTCCTTGGTATTCCGAGGAGCATGCCTGTTTGAGTGTCATTAAATTCTCAACCTCACCCGTTTTCTGAACGGTACCCGAGGCTTGGATGTGGGGGTTTGTGCAGGCTGCCTCAGCGCTGGTCTGCTCCCCTGAAATGCATTAGCGAGTTCATACTGAACCTCCGTCTATTGGTGTGATAATTATCTACGCCGTGGACTGGGTTTAGACTCGCTTCTAACCGTCCGCAAGGACAATACCTTTGACAATTTGACCTCAAATCAGGTAGGACTACCCGCTGAACTTAA
OTU 380	133	Ascomycota	Pezizomycotina	Leotiomycetes	Leotiomycetidae	Helotiales	Helotiaceae	Hymenoscyphus	Hymenoscyphus sp.	Pathotroph-Saprotroph-Symbiotroph	Bryophyte Parasite-Ectomycorrhizal-Ericoid Mycorrhizal-Undefined Saprotroph	Possible	Microfungus; Dark Septate Microfungus		UDB034372	SH1543033.08FU	307.1	91.29	AACGCACATTGCGCCCCTTGGTATTCCGAGGGGCATGCCTGTTCGAGCGTCATTTTGACCAACTCCTCTTTATAGAGGGTCTTGGGCTTCGCCCCTGGGCGGGCCTCAAAATCAGTGGCGGTGCTGTTAGGCTCTACGCGTAGTAATATTCCTCGCGACAGACCCCTAATGGTTACTTGCCAGCAACCCCCAACTTCTTAAGGTTGACCTCGGATCAGGTAGGGATACCCGCTGAACTTAA
OTU 381	132	Basidiomycota	Agaricomycotina	Agaricomycetes	Agaricomycetidae	Agaricales	Typhulaceae	Typhula	Typhula fistulosa 1	Pathotroph	Plant Pathogen	Probable	NULL		UDB033340	SH1525669.08FU			AACGCACCTTGCACTCTTTGGTATTCCGAAGAGTATGTCTGTTTGAGTGTCATGAAACTCTCAACCCCCTTGTTTTGTAATGAGACGAGCGTGGGCTTGGATTATGGCTGCTGCCGGCGTAACTGTCGACTCGGCTGAAATATATGAGCTACCCATTTCTAAGAAATAGACGGTTTGACTCGGCGTAATAATATATTTCGCTGAGGACGTCACATTCTTAATCATTAGTGGTGCTTCTAATGCGACATCTAAATTTAAGCTTTAGACCTCAAATCAGTCAGGACTACCCGCTGAACTTAA
OTU 382	132	Basidiomycota	Agaricomycotina	Agaricomycetes	Agaricomycetidae	Agaricales			Agaricales	-	-	-	-		UDB037355	SH1557955.08FU	228.2	80.25	AACGCACATTGCACCTTTTGGTATTCCGAAAGGTATGCCTGTTTGAGTATCATTAATCTCTCAACGCTATGGTTTTTATTAACTGTATGCGCTTGGATTTTGAAGGTTTGCTGGCGTTATTGTCAGCTCCTTTTAAATGTATTAGCAGGACTTGTTAGACCAGCTTCGGTTTGATAATAATTCTTATCTATGCTGTCGCTGAGAAACTATTGTTCTGCTTCTAATTGTCTACGTAGTAGACTGTCTCTTATGAGGCATCACTTGAATCTTGATCTCAAATCAGGTAGGACTACCCGCTGAACTTAA
OTU 383	132	Ascomycota							Ascomycota	-	-	-	-		UDB027982	SH1635779.08FU	156.1	76.47	AACGCACATTGCGCCCTCTGGTATTCCGGGGGGCATGCCTGTTCGAGCGTCATTATCACCCCTCAAGCTCGGCTTGTTGTTGGACGTTTGGTGAGACTTTTAACTAAGTCTTGTCCGTCTCAAAGATAATGACGGCGTCGGCGAGGACTCCGGTACACTGAGCTTTCGGGCACGTACTCGGTATAAGGACTCGCGGACCCGGTCTATTCGTACGCACCTTTAACTAGGTGCGTGCAACCCCCTTCTCAAGGTTGACCTCGGATCAGGTAGGAATACCCGCTGAACTTAA
OTU 384	132	Ascomycota	Pezizomycotina	Leotiomycetes	Leotiomycetidae	Helotiales	Dermateaceae	Pyrenopeziza	Pyrenopeziza millegrana 1	Pathotroph	Plant Pathogen	Probable	NULL		UDB003071	SH1545961.08FU			AACGCACATTGCGCCCCTTGGTATTCCGGGGGGCATGCCTGTTCGAGCGTCATTATAACCCTCAAGCCTAGCTTGGTGTTGGGGCATGCTTCTGCAGCCCTTAAAATCAGTGGCAGTGCCTGTTGGCTCTAAGCGTAGTAATACTCCTCGCTATAGAACCCAGTAGATACGCGCCAGAACCCCAAATTTTCTATGGTTGACCTCGGATCAGGTAGGGATACCCGCTGAACTTAA
OTU 385	132	Ascomycota	Pezizomycotina	Dothideomycetes	Pleosporomycetidae	Pleosporales			Pleosporales	-	-	-	-		UDB028324		281.4	87.89	AACGCACATTGCGCCCCTTGGTATTCCATGGGGCATGCCTGTTCGAGCGTCATTTGTACCCTCAAGCTCTGCTTGGTGTTGGGTGTTTGTCCCGCCTTTTGCGCGTGGACTCGCCTTAAAGCGATTGGCAGCCGGCATATTGTCTCGGAGCGCAGCACATTTTGCACTCTTTTACAATAGTTGTTGGTATCCAGTAAGCCTTTTACATTTGCTCTTGACCTCGGATCAGGTAGGGATACCCGCTGAACTTAA
OTU 386	131	Basidiomycota	Agaricomycotina	Agaricomycetes	Agaricomycetidae	Boletales	Boletaceae	Xerocomellus	Xerocomellus sp. 1	Symbiotroph	Ectomycorrhizal	Highly Probable	Boletoid	Putative long-distance a	UDB032512	SH1547236.08FU			AACGCACATTGCGCTCTTTGGTATTCCGGAGAGCATGCCTGTTTGAGAATCAGTAAATCTATCAACCGCTTTTATTGCGGTTGGATATGGGTCCTTTGAGACTTCACAGCCTCAATGACCTGAAATGAAATGTTACGCATCCTTGGACTAACAGTTCTTGGGCATACGCATGAATGAGGCAACTCACAAGTACGTCTGTTCTCATGGAATTGTCGGTTTGATTGGACTGGGTAACTCAACTATTATCCAGAGTTGGACGACGTCAGTCAGCCTTCTTTGAACACTTGGTCTCAAATCAGGTAGGAAAACCCGCTGAACTTAA
OTU 387	130	Basidiomycota	Agaricomycotina	Agaricomycetes	Agaricomycetidae	Agaricales	Tricholomataceae	Hemimycena	Hemimycena subtilis 1	Saprotroph	Undefined Saprotroph	Probable	NULL		UDB031077	SH1641244.08FU			AACGCACATTGCACTCTTTGGTATTCCGAAGAGTATGCCTGTTTGAGTACCGTTTTCAACCATCACATTCCCGAGACCTGCCTTTGTGCTTGTCATGGGTTGTGGATCTGGCTCTTATCCTTGAATCCGATTCATTTCTGGAATCAGGGTGGGCTGAAATATCGTTGTTCGGAGCCGCTGTCAACCATACCTGGGGTCATGTCCTAACCTGGTTGCCGTCTTTTGCTCACTTCACTGTACAAAGGCCGATTTAGATAAATACTCGGTGCAGACTTGAAAATAAGGGCTTCACCGCTCCTTTCTCACTTGCACTTAGACCTTCTTCAACGGCTGGAGCATTAGAAAAGGTATACGACCCACCTATGCCAGGCGCATGTTTTAGCTGATGCCCATGACTTT…
OTU 388	130	Ascomycota	Pezizomycotina	Dothideomycetes	Pleosporomycetidae	Pleosporales			Pleosporales	-	-	-	-		UDB020918	SH1591179.08FU	202.4	81.61	AACGCACATTGCGCCCTTTGGTATTCCTTAGGGCATGCCTGTTCGAGCGTCATTTAAACCTTCAAGCTCAGCTTGGTGTTGGGTGTCTGTCCCGCCTCGGCGCGGACTCGCCTTAAATTCATTGGCGGCCGGTACATTGGCTTCGAGCGCAGCAGAAACGCGAACTCGAGGACTATGGATCGGCTCCCATAAGCTATTTTCTATTTTTGACCTCGGATCAGGTAGGGATACCCGCTGAACTTAA
OTU 389	130	Ascomycota	Pezizomycotina	Pezizomycetes	Pezizomycetidae	Pezizales	Pyronemataceae	Scutellinia	Scutellinia sp.	Saprotroph	Undefined Saprotroph	Probable	Pezizoid		UDB028115	SH1556383.08FU	339.8	91.08	AACGCACATTGCGCCTCCTGGTATTCCGGGAGGCATGCCTGTTCGAGCGTCATTAATAAACCACTCAAGCCCTTTTGGGGCTTGGTATTGGGAGAGGAGTGCACTTGCTTGCCCTCCCTCCCGAAATCCAATGGCGGAAAGCCCCACGTGCCCCGGCGTAGTAAGTTTTTCTTTCGCTCGGAACGTGAGGCGCTCCTGCCCCGAACCCCCCCAATTAAAATCAAGGTTGACCTCGGATCAGGTAGGGATACCCGCTGAACTTAA
OTU 390	129	Basidiomycota	Agaricomycotina	Agaricomycetes	Agaricomycetidae	Agaricales	Psathyrellaceae	Coprinellus	Coprinellus hiascens 1	Saprotroph	Dung Saprotroph-Plant Saprotroph-Wood Saprotroph	Probable	Agaricoid		UDB038314	SH1513429.08FU			AACGCACCTTGCGCTCCTTGGTATTCCGAGGAGCATGCCTGTTTGAGTGTCATTAAATTCTCAACCTCACCAGTTTTGTAACGAGACTGTGTAAGGCTTGGATGTGGGGGTTTATGCAGGCTGCCTCTGTGCGGTCTGCTCCCCTGAAATGCATTAGCGAGTTCACTAAGCTCCGTCTATTGGTGTGATAATTATCTACGCCGTGGAATGGGTTTAGACTTGCTTCTAACCGTCTGCAAAGACAACTTTTGACAATTTGACCTCAAATCAGGTAGGACTACCCGCTGAACTTAA
OTU 391	129	Basidiomycota							Basidiomycota	-	-	-	-		UDB038161	SH1573703.08FU	96.0	94.03	AACGCACCTTGCGCTCCCTGGTATTCCGGGGAGCATGTCTGTTTGAGTGTCATGAACTCTTCAACCCACCAGTTTCTTGTAGACTGATTGGTGTTTGGATTTTGAGCGCTGCTGGTCTTCGGATCTAGCTCGTTCGTAATATATTAGCATCTCTAATTCGACTTCGGATTGACTCAGTGTAATAGACTATTCGCTGAGGACACACCTAGTGTGGCCGAACGTTGATCTCAGTAGAAGCTTCCAACTATTGTAGTCAATTTTAGATTAGACCTCAGATCAGGCAGGATTACCCGCTGAACTTAA
OTU 392	129	Ascomycota	Pezizomycotina	Sordariomycetes	Hypocreomycetidae	Hypocreales	Cordycipitaceae	Torrubiella	Torrubiella sp. 1	Pathotroph	Animal Pathogen	Probable	NULL		UDB033201	SH1557178.08FU			AACGCACATTGCACCCCCTGGTATTCCGGGGGGTATGCCTGTTCGAGCGTCATTAACAACCCTCAAGCTCTGCTTGGTATTGGGCCCCGCCGACCCGGCGAGCCCTAAAATCAGTGGCGGTGCCATCTGGTTCCGAGCGTAGTAATTCTTCTCGCTTTGGAGGCCGGGTGTGTGCTTGCCAGCAACCCCCAATTTTTTTAAGTTTGACCTCGGATCAGGTAGGGATACCCGCTGAACTTAA
OTU 393	129	Ascomycota							Ascomycota	-	-	-	-		UDB031063	SH1523025.08FU	185.3	80.88	AACGCACATTGCGCCCCTTGGTATTCCGAGGGGCATGCCTGTTCGAGCGTCATTTCAAACCTCAAGCTCACGCTTGGTATTGGGCGTCGTCCGCTAGGACGTGCCAGAAACCCGTAGGCAGCGGTGCCCGTCTCCCAGCGTAGTCAAGTTACCCGCTACGGAGCGCGCGGTGCCGCCCGCCGGACGAACAATCCAATTTTTTCTATGGTTTGACCTCGGATCAGGTAGGGATACCCGCTGAACTTAA
OTU 394	128	Ascomycota	Pezizomycotina	Dothideomycetes	Pleosporomycetidae	Pleosporales			Pleosporales	-	-	-	-		UDB025129	SH1635394.08FU	228.2	83.92	AACGCACATTGCGCCCCTTGGTATTCCATGGGGCATGCCTGTTCGAGCGTCATTTGTACCCTCAAGCTATGCTTGGTGTTGGGTGATTGTCCAGTCTTTTCTAGTCAGGACTCGCCTTAAAGTAATTGGCAGCCAGTATTTTGGTATAAAGCGCAGCACATTTTGCGATTTAGTCCAGCAATATTAGCAACCATCAAGTTTATTTATCACTTTTGACCTCGGATCAGGTAGGGATACCCGCTGAACTTAA
OTU 395	127	Basidiomycota	Agaricomycotina	Agaricomycetes	Agaricomycetidae	Agaricales	Hymenogastraceae		Hymenogastraceae	-	-	-	-		UDB037636	SH1563849.08FU	319.2	86.69	AACGCACCTTGCGCTCCTTGGTATTCCGAGGAGCATGCCTGTTTGAGTGTCATTAAATTCTCAACCTTTCAATTAAATTTTGAATGGCTTGGATGTGGGGGTTCTTTTTTGCTGGCTTCGGTCGGCTCCCCTTAAATGCATTAGCTGGTGTACCCGACGGGTGGACTTTTGGTGTGATAATTATCTACGCCATGTTATTGTCTGCGTCTTTCACTGCTTCTAACCGTCCGTTCATTCGGACAATTGAATGACAATTTGACCTCAAATCAGGTAGGACTACCCGCTGAACTTAA
OTU 396	127	Ascomycota	Pezizomycotina	Leotiomycetes	Leotiomycetidae	Helotiales	Hyaloscyphaceae	Calycellina	Calycellina sp.	Saprotroph	Undefined Saprotroph	Probable	NULL		UDB034361	SH1566313.08FU	267.7	93.3	AACGCACATTGCGCCCTCTGGTATTCCGGAGGGCATGCCTGTTCGAGCGTCATAATGACCAACTCACCCCCGTGGTGGACTTGGAGCTGGCCGGTCTGGCCTCTCTTAAAACCAGTGGCGGTGCTCTTAAGCTCTACGCGTAGTAATTTCTCTCGCGACAGGGTCTTGATGGTGCTTGCCAACAACCCCAACTCTTATAAGGTTGACCTCGGATCAGGTAGGGATACCCGCTGAACTTAA
OTU 397	127	Basidiomycota	Agaricomycotina	Tremellomycetes	Tremellomycetes sbc Incertae sedis	Tremellales	Bulleribasidiaceae	Dioszegia	Dioszegia sp.	Pathotroph-Saprotroph-Symbiotroph	Fungal Parasite-Undefined Saprotroph	Possible	Tremelloid-Yeast		UDB025726	SH1609776.08FU	279.7	90.67	AACGCAAATTGCGCCCTTTGGTATTCCGAAGGGCATGCCTGTTTGAGTGTCTTATAAACCTCACCCCTAATGTTTTATTACAATAGGTTGGTGCTTTGGGTGTTGCCATTTACCTGGCTCGCCTTAAATGTCTAAGTGGAATGCGTAATAAGTTCTCGCAACCCTCCACTCTAATACAATTTATATTCTGACCTCAAATCAGGTAGGACTACCCGCTGAACTTAA
OTU 398	127	Ascomycota	Pezizomycotina	Sordariomycetes	Hypocreomycetidae	Hypocreales	Tilachlidiaceae		Tilachlidiaceae	Saprotroph	Undefined Saprotroph	Possible	Microfungus		UDB035658	SH1513367.08FU	278.0	86.84	AACGCACATTGCGCCCGCCAGTATTCTGGCGGGCATGCCTGTCTGAGCGTCATTTCAACCCTCAGCCCCCGTCCGCGGGGCGCTGGCGTTGGGGATCGGCCGTCCTTGCGGCGGCCGGCCCCGAAACACAGTGGCGGTCTCCCGTAGACTCCCCTGCGTAGTACCACTACCTCGCAGAAGGGACGAGCGGGCTGGCCACGCCGTAAAACCCCCAACTTCTCAAGGTTGACCTCAGATCAGGTAGGAATACCCGCTGAACTTAA
OTU 399	126	Ascomycota	Pezizomycotina	Sordariomycetes	Hypocreomycetidae	Hypocreales	Cordycipitaceae	Beauveria	Beauveria sp.	Pathotroph	Animal Pathogen	Probable	NULL		UDB027443	SH1524419.08FU	408.4	97.65	AACGCACATTGCGCCCGCCAGCATTCTGGCGGGCATGCCTGTTCGAGCGTCATTTCAACCCTCGACCTCCCCTTGGGGAGGTCGGCGTTGGGGACCGGCAGCACACCGCCGGCCCTGAAATGGAGTGGCGGCCCGTCCGCGGCGACCTCTGCGTAGTAATACAGCTCGCACCGGAACCCCGACGCGGCCACGCCGTAAAACACCCAACTTCTGAACGTTGACCTCGAATCAGGTAGGACTACCCGCTGAACTTAA
OTU 400	126	Ascomycota	Pezizomycotina	Sordariomycetes	Hypocreomycetidae	Hypocreales			Hypocreales	Saprotroph	Undefined Saprotroph	Possible	Microfungus		UDB025323	SH1578124.08FU	238.5	83.15	AACGCACATTGCGCCCGCTGGAACTCCGGCGGGCATGCCTGTCCGAGCGTCATTTCAACCCTCAGGTCCCCCTTCCGGGGGCGGACCTGGTGTTGGGGCCCGGCCGTCTCACGGCGGCCGACCCCTAAATGCAGTGGCGGTCTCGCCGCAATCCCTTGCGTAGTAATTACACCTCGCACCGGAGAGCGACGCGGCCACGCCGTTAAACCCCCAATTTTCAATGGTTGACCTCGGATCAGGTAGGAATACCCGCTGAACTTAA
OTU 401	126	Ascomycota	Pezizomycotina	Leotiomycetes	Leotiomycetidae	Helotiales	Hyaloscyphaceae		Hyaloscyphaceae	Saprotroph	Plant Saprotroph-Wood Saprotroph	Probable	Microfungus		UDB019834	SH1648851.08FU	252.2	89.62	AACGCACATTGCGCCCCTTGGTATTCCGAGGGGCATGCCTATTCGAGCGTCATTATCACCCCTCAAGCCTAGCTTGGTGTTGGGGCCTGCCGTCAAGGCAGCCCTTAAAATCAGTGGCAGTGCTGTCAGGCTCTAAGCGTAGTAAACACGTCGCTACAGAGCCCTGGGAGCGCTCGCTATCACCCCCCACTCTTATAATGATTGACCTCGGATTAGGTAGGGATACCCGCTGAACTTAA
OTU 402	126	Basidiomycota	Agaricomycotina	Agaricomycetes	Agaricomycetidae	Agaricales	Tricholomataceae	Arrhenia	Arrhenia gerardiana 1	Saprotroph	Undefined Saprotroph	Probable	NULL		UDB038324	SH1611756.08FU			AACGCATCTTGCGCCCTTTGGTATTCCGAGGGGCATGCCTGTTTGAGTGTCGCATTACTCTCAACCCTCGCCGTATGTACGGCTTGGGCTTGGACCGTGGCCGAGCGGCTGGCGTCTCGACGTCTGGCCCGGCAGAAATGGATGCGGAGCATCGCGACCGCATGACCGAGCGTTGTAGAACCTCGCAAGGTCTGCTGGCGCAGCTCTCCAGTCATCATCTTCGACCTCAAATCAGGTAGGACTACCCGCTGAACTTAA
OTU 403	125	Ascomycota	Pezizomycotina	Sordariomycetes	Hypocreomycetidae	Glomerellales	Plectosphaerellaceae		Plectosphaerellaceae	Pathotroph-Saprotroph-Symbiotroph	Animal Pathogen-Endophyte-Fungal Parasite-Plant Pathogen=Wood Saprotroph	Possible	Microfungus		UDB011028	SH1578121.08FU	274.5	85.46	AACGCACATTGCGCCCGCCAGCATTCTGGCGGGCATGCCTGTTCGAGCGTCATTTCAACCCTCGCAGCCCCTCTGGGCAGCGGTGTTGGGGACCGGCACAACTGGCGCGCCCCCGTGGCGCCCGGCGCCGCCCCCGAAATACAGTGGCGGTCCCGCCGCAGCCTCCCTTGCGTAGTAGCACACCTCGCACCGGAGCGCGGCGCGGCCATGCCGTAAAACCCCCGACTTTCTGAGTTTGACCTCGAATCAGGTAGGAATACCCGCTGAACTTAA
OTU 404	121	Basidiomycota	Agaricomycotina	Agaricomycetes	Agaricomycetidae	Agaricales	Tricholomataceae	Hemimycena	Hemimycena subtilis 1	Saprotroph	Undefined Saprotroph	Probable	NULL		UDB031077	SH1641244.08FU			AACGCATATTGCACTCTTTGGTATTCCGAAGAGTATGCCTGTTTCAGTATCAGAAATATCCTCGAATTTAATTCGGATGTGGGCTTTTTTGTAAGAAAATTTTTTTTTTTTTACTGGCCTAAAATTTAATCAGGATGGATCTTGGGAAATTAACCCAACGATTTTTATAAGGCGTCATAGTTGGCTTTTTTGGTCATCTTTCGCTGAAGAAATTGTTTGGGCCTGAGTTCATTTTGTATAAAATTTTTTTTTCCAAACTTGATCTGAAATCAGGCAGGATTACCCGCTGAACTTAA
OTU 405	121	Basidiomycota	Agaricomycotina	Agaricomycetes	Agaricomycetes sbc Incertae sedis	Cantharellales	Ceratobasidiaceae	Ceratobasidium	Ceratobasidium sp.	Pathotroph-Saprotroph-Symbiotroph	Endomycorrhizal-Plant Pathogen-Undefined Saprotroph	Possible	Microfungus		UDB017026	SH1554510.08FU	393.0	90.57	AACGCACCTTGCGCTCCTTGGTATTCCTCGGAGCATGCCTGTTTGAGTATCATGAAATCCTCAAAGCAAATACCTTTTGTTCATTCGATTGGTTTTGTTTTGGACTTGGAGGTCTGCAGATTCACGTCTGCTCCTCTTAAATATATTAGCTGGATCTCAGTGAGCTCGGTTCCACTCGGCGTGATAAGTATCACTCGCCGAGGACGCTGTAAAAAGGTGGCCGGGATCGCAGACGAACCGCTTCTAATGGTCTATTAGCTTAGACAATTACTCTTATGATTTGATCTCAAATCAGGTAGGACTACCCGCTGAACTTAA
OTU 406	120	Ascomycota	Pezizomycotina	Sordariomycetes	Hypocreomycetidae	Hypocreales	Clavicipitaceae		Clavicipitaceae	Saprotroph	Undefined Saprotroph	Possible	Microfungus		UDB035685	SH1552440.08FU	288.3	85.86	AACGCACATTGCGCCCGCCAGTATTCTGGCGGGCATGCCTGTTCGAGCGTCATTTCAACCCTCAAGACCCCTTCGGGGGACTTGGTGTTGGGGACCGGCACAGGGGCCTGCCTGCTTGTCTTGCAGCGCCCTCGCCGCCCCCGAAATGAATTGGCGGCCTCGTCGCGGCCTCCCCTGCGTAGTAGCACAACCTCGCAACGGGAACGTGACGGCGGCCACTGCCGTAAAACAACCCCAATTTTATTAGAGTTGACCTCGAATCAGGTAGGAATACCCGCTGAACTTAA
OTU 407	120	Ascomycota	Pezizomycotina	Leotiomycetes	Leotiomycetidae	Helotiales	Helotiaceae	Crocicreas	Crocicreas epicalamia 1	Saprotroph	Undefined Saprotroph	Probable	Pezizoid		UDB003049	SH1510110.08FU			AACGCACATTGCGCCCCTTGGTATTCCGGGGGGCATGCCTCTTCCAGCGTCATTTCACCCCTCAAGCTCTGCTTGGTCTTGGGCCGCGCCGCGCAAGCGGCGGGCCTCGAAAACAGTGGCGGCGCCATCTGGGCTCTCAGCGTAGTAATTCTTCTCGCTGTTGGGCTCCGGTGGTCGCCCGCCAGCAACCCCCAACTTTTACAGTTTGACCTGGGATGAGGTAGGGATACCCGCTGAACTTAA
OTU 408	119	Basidiomycota							Basidiomycota 1	-	-	-	-		UDB024389	SH1544161.08FU			AACGCACCTTGCACTCCTTGGTATTCCGAGGAGTATGCCTGTTTGAGTGTCTTTAAATCATCAATCTTTCTTTACTTTTTGTGAGGTTGGATTGGATTTGGGGATTGCTGGCTTTTCAAGTCAGCTTCCCTTGAATGCATTAGTTGAACTGAGTTGCAACGCTTATGTGTAGCATGATAATATCTTTGCTTCATAGTTGTTAATGAAGTTTGGCTTCTAACAGTCCTTTATTGGACAACACTTTGACTATTAGACCTCAAATCAGGTAGGACTACCCGCTGAACTTAA
OTU 409	118	Ascomycota							Ascomycota	-	-	-	-		UDB024180	SH1550253.08FU	125.2	95.24	AACGCACATTGCGCCCCTCGGTATTCCGTGGGGCATGCCTGTTCGAGCGTCATTTAACCCCTCAAGCCTAGCTTGGTATTGGGTGCTTGTCCCGCCTCTCGCGCGGCGACTCACCTCAAAGTCATTGGCAGCCCGCATCTCGCCGGCCGTGAGCGCAGCACAGACGCGCTCTTGGCAACGACGGATCGGCTCTCCAAAAGCTTATTTCAACCACTGACCTCGGATCAGGTAGGGATACCCGCTGAACTTAA
OTU 410	117	Ascomycota	Pezizomycotina	Leotiomycetes	Leotiomycetidae	Helotiales	Helotiaceae	Crocicreas	Crocicreas epicalamia	Saprotroph	Undefined Saprotroph	Probable	Pezizoid		UDB003049	SH1510110.08FU			AACGCACATTGCGCCCCTTGGTATTCCGGGGGGCATGCCTCTTCCAGCGTCATTTCACCACTCCCGCTCCGCGGGGTCTTGGGCCACGCCGGCAACGGCGGGCCTCGAAAACAGTGGCGGCGCCATCGTGCTCTCAGCGTAGTAATTCTTCTCGCTGTTGGGTCCCGGTGGTCGCCCGCCAGCAACCCCCAACTTTCTAAGTTTGACCTGGGATGAGGTAGGGATACCCGCTGAACTTAA
OTU 411	117	Ascomycota							Ascomycota	-	-	-	-		UDB027583	SH1524445.08FU	121.7	80.72	AACGCACATTGCGCCCGCCGGCATTCCGGCGGGCATGCCTGTTCGAGCGTCATTTCAACCCTCTAGCCCTCCTCTTTTGCGTAGGCTTGGTGTTGGGGGATCGCGGCTATAAGCGACCCCTGAAAACTAGTGGCGGCTCCGCCCGCGGCAATCATTGCGTAGTAGCACAAACACTCGCATTGGGGCCCGGCGGTAGTCCTTTGCCGTAAAACTGATAGTGAAGTATGTAATACGGAAAGGGTTCGCCCTATCTTATTCTGCTAAGCTCTCAATATTCTATGAGTTGACCTCGAATCAGGTAGGAATACCCGCTGAACTTAA
OTU 412	117	Ascomycota	Pezizomycotina	Sordariomycetes	Hypocreomycetidae	Hypocreales	Hypocreales fam Incertae sedis	Stilbella	Stilbella sp.	Saprotroph-Symbiotroph	Dung Saprotroph-Endophyte-Wood Saprotroph	Possible	NULL		UDB023669	SH1522847.08FU	319.2	90.94	AACGCACATTGCGCCCGCCAGTATTCTGGCGGGCATGCCTGTCTGAGCGTCATTTCAACCCTCAAGCAACTTCTGCTTGGTGTTGGGGATCGGCCGTTAAACGCCGCCCCCGAAATCTATTGGCGATCTCGCTGTAGCTTCCTATGCGTAGTAGTAACATCTCGCATCTGGAGAGCGGCGCGGTCATGCCGTAAAACACCCAACTTCTCAGGTTGACCTCAGATCAGGTAGGAATACCCGCTGAACTTAA
OTU 413	116	Glomeromycota	Glomeromycotina	Glomeromycetes		Glomerales	Glomeraceae	Glomus	Glomus intraradices 5	Symbiotroph	Arbuscular Mycorrhizal	Highly Probable	NULL				532.0	99.32	AACGCAAATTGCACTCTCTGGTAACCCGGGGAGTATGCCTGTTTGAGGGTCAGTGTTAATAAAAATCGGTGCGTTGCAATTTTTGTGATGTTCCGGAGTTTGAGTTATCTTATCTTCTGGGTTTAAGAGGCTTAAAATTGACCTTTTTTGTGCATTTTAGACGTACATAAATTTTTTTTTATTCGTCTATCTTAATGCCAAAATCTATTAGATGCGACCATATCATGTGGTTTCGTGTCTATAAATTTTTCATGATTTGACCTCAAATCAGGTAGGAACACCCGCTGAACTTAA
OTU 414	116	Basidiomycota	Agaricomycotina	Agaricomycetes	Agaricomycetidae	Agaricales	Psathyrellaceae	Psathyrella	Psathyrella prona 1	Saprotroph	Wood Saprotroph	Probable	Agaricoid		UDB024758	SH1513507.08FU			AACGCACCTTGCGCTCCTTGGTATTCCGAGGAGCATGCCTGTTTGAGTGTCATTAAATTCTCAACCTCACCAGTTTTGTTATGAAACTGTGTAAGGCTTGGATGTGGGGGTTTGTGCAGGTTGCCTTTGCGCGGTCTGCTCCCCTAAAATGTATTAGCGAGTTCACTGAGCTCCGTCTATTGGTGTGATAATTATCTACGCCGTGGATTGGACTTAGACTTGCTTCTAACCGTCCGCAAGGACAATCTTATGACAATTTGACCTCAAATCAGGTAGGACTACCCGCTGAACTTAA
OTU 415	115	Ascomycota							Ascomycota	-	-	-	-		UDB027689	SH1506867.08FU	181.8	79.78	AACGCACATTGCGCCCGCCAGCATCCTGGCGGGCATGCCTGTTCGAGCGTCATTTCAACCCTCAAGCCCCCGCGGCTTGGTGTTGGGGGCCTGCGCACCGCAGCCCCCTAAAGACAGCGGCGGGCGTGGCCTGGCACCGAACGTAGTAGACTCTCTCTCGTTCGCGGTCCAGGGCGCGCTCCGGCCGGTAAACCCCCCAATTTTTACAATGGTTGACCTCGGATCAGGTAGGAATACCCGCTGAACTTAA
OTU 416	115	Ascomycota	Pezizomycotina	Leotiomycetes	Leotiomycetidae	Helotiales	Helotiaceae	Crocicreas	Crocicreas furvum 1	Saprotroph	Undefined Saprotroph	Probable	Pezizoid		UDB003014	SH1573385.08FU			AACGCACATTGCGCCCCGTGGTATTCCGCGGGGCATGCCTGTTCGAGCGTCATTATGACCAATCCCGCGTGCGGGGTCTTGGGCACCGCCGCCTGGCGGGCCTCAAAATCAGTGGCGGTCCGGCCGGGCTCTGAGCGTAGTAAATCTTCTCGCTACAGGGTCCCGGGCGGCACTGGCCAGCAACCCCCAATCTTTCACAGGTTGACCTCGGATCAGGTAGGGATACCCGCTGAACTTAA
OTU 417	114	Basidiomycota	Agaricomycotina	Tremellomycetes		Trichosporonales			Trichosporonales	-	-	-	-		UDB027341	SH1514262.08FU	233.3	83.52	AACGCAACTTGCGCCCTTTGGTATTCCGAAGGGCATGCCTGTTTGAGTGTCATGAAATCTCAACCACCAGGGTTTCCTGATGGCTTGGATTTGGGTGCTTGCCTTTTGTAAGGCTCACCTTAAAGGAGTTAGCATGATGAGTAGTGATCTGTCTGGTGTAATAAGTTTCGCTGGGCTAGCTATGAAGCGTGCTTCTAATCGCCTTTACAGGCATGTTATTATGACTCTGACCTCAAATCAGGTAGGACTACCCGCTGAACTTAA
OTU 418	114	Ascomycota	Pezizomycotina	Sordariomycetes					Sordariomycetes 1	-	-	-	-		UDB024433	SH1648729.08FU			AACGCACATTGCGCCCGCCAGTACTCTGGCGGGCATGCCTGTTCGAGCGTCATTTCAACCCTCAAGCCCTCGCTTGGTGTTGGGGCCCTGCGGCTGCCGCAGGCCCCGAAATGGAGTGGCGGGCTCGCGGCGACTCCGAGCGTAGTAGAATCCTATTCTCGCTAGGGAGTCGTGGCGCGCTCCGGCCGTTAAAGGACCCATCTTTTAACACAAGGTTGACCTCGGATCAGGTAGGAATACCCGCTGAACTTAA
OTU 419	113	Basidiomycota							Basidiomycota	-	-	-	-		UDB028068	SH1561852.08FU	137.2	75.16	AACGCACCTTGCACCCTTTGGTATTCCGAAGGGTACACCCGTTTGAGTGTCATTGTAATCTCACTACGACCACTTTATTGTTGTTTGTATGTGGACTTGGATGTTGCCGTGTAACAAACGGCTCGTCTGAAATGCCTGAGTGTACCCTGCTTTTGCGGCGTATTCGGTGTGATAAATCTTCACCGGAGTTGACTTTCGGGTCGCGCTTGTATTGTCAGGCCCTATGCTTCCAACCGTCCTAACAAGACAATCTCTGACAATTTGACCTCAAATCGGGTGGGACTACCCGCTGAACTTAA
OTU 420	113	Ascomycota	Pezizomycotina	Pezizomycetes	Pezizomycetidae	Pezizales			Pezizales	-	-	-	-		UDB023665	SH1556382.08FU	226.5	83.46	AACGCACATTGCGCCCCTTGGTATTCCTTGGGGCATGCCTGTTCGAGCGTCATTAAAACCACTCAAGCTGCTTTGCTTGGTCATGGAAGAAGAGTCTGTCTGTCAGCCTCCCTTTTGAATTTCAATGGCGGAAGGTCCTCCGGTGCCTGGCGTAGTAATAACTGTTCGCTTTGCACCTGGATGTGTTTCCTGCCCCAAACCCCCCACTTTAAGGTTGACCTCGGATCAGGTAGGGATACCCGCTGAACTTAA
OTU 421	113	Ascomycota	Pezizomycotina	Sordariomycetes	Sordariomycetidae	Sordariales			Sordariales	-	-	-	-		UDB027689	SH1506867.08FU	228.2	83.33	AACGCACATTGCGCCCGCCAGCATCCTGGCGGGCATGCCTGTTCGAGCGTCATTTCAACCCTCAGGCCCGGCCTGGTGTTGGGGCCCTACGCGCCGTAGGCCCCAAAAGACAGTGGCGGGCTCGACCGGACCCCGAGCGCAGTATTTTGCCTCGCCCTGGGCGTCCGACGGGTCCCCGCCGTAAACCCCCCATCTTTTACAAGGTTGACCTCGGATCAGGTAGGAATACCCGCTGAACTTAA
OTU 422	111	Basidiomycota	Agaricomycotina	Agaricomycetes	Agaricomycetes sbc Incertae sedis	Auriculariales			Auriculariales	-	-	-	-		UDB014156	SH1560213.08FU	320.9	89.63	AACGCATCTTGCGCTCCTTGGTATTCCATGGAGCATGCCTGTTTGAGTGTCACGTAAACCCTCACACCTGCGATGTCAAAATCGTGGGTCGTGGATTTGGATCGTGCCGTAATTGGCTCGTCCTGAAATGCATTAGCTTGTGCTCGTTAGAGTGCTCGGCATGGTGTGATAATTATCTGCGCCGTTATGCCTTAGGCCTCTTCTGTGTGCGCTGCTTCCAATCGTCCCTCGTGGACAACATTACATTTAAAGCTTTGGCCTCAAATCAGGTAGGACTACCCGCTGAACTTAA
OTU 423	111	Ascomycota	Pezizomycotina	Leotiomycetes	Leotiomycetidae	Helotiales	Cenangiaceae		Cenangiaceae	-	-	-	-		UDB031063	SH1523025.08FU	269.4	88.33	AACGCACATTGCGCCCCCTGGTATTCCGGGGGGCATGCCTGTTCGAGCGTCATTATAACCCTCAAGCTCAGCTTGGTGTTGGGGCTCGCCGGAGACGGCGTCCCCTAAAGTCAGTGGCGGCGCCTTTAGGCCCTGAGCGTAGTAATTCTTCTCGCTATAGGGTCCTGGAGGACGCTGGCCAGCAACCCCAAATTTTCAAAGGTTGACCTCGGATCAGGTAGGGATACCCGCTGAACTTAA
OTU 424	110								Fungi 5	-	-	-	-						AACGCACATTGCGCTTCCTGGCATTCCGGGGAGCATGCCTGTTTCAGAATCATTAAAACCTCTCACCCACTATTGTGTGTTTTTAATGCCAATAGCACGGTGGATTTTGAGTGTTTTTGGAAATTTACTTTTTCAAATCACTTTAATTTTATAGTATGCAGCCATTGTTTTCACTCATTTTCAAAATGTTTGGTGAATGGTTCCCAAGTGCAATAAAGACTAAACACCTTTCCCACGCTTGAGACCGCAAAGTTCCCGAACACTTTAAGTTTTGAATATGGGATATTGGAGCAATTTTTTGTATCTCAAATTATTAAACAAAATGTTTATCTTCGGATAAGTGTTTTGAAACTTTGATCTGAAATCAAGCAAGAAAACCCGCTGAACTTAA
OTU 425	110	Ascomycota							Ascomycota	-	-	-	-		UDB025129	SH1635394.08FU	187.0	80.62	AACGCACATTGCGCCCCTTGGTATTCCAGGGGGCATGCCTGTTCGAGCGTCATTTGTACTCTCAAGCCTTGCTTGGTGTTGGGTGCTTGTCTTTGCTCTGCAAAGACTCACTTCAAATATATTGGCAGCCGATAAATTGGTTTGAAGCGCAGCACAATTGCAATTTAAGCCCTTTTATTAGCACCCAAGAGACATTTTTACACTTTTGACCTCGAATCAGGTAGGGATACCCGCTGAACTTAA
OTU 426	110	Ascomycota							Ascomycota	-	-	-	-		UDB027689	SH1506867.08FU	183.5	79.85	AACGCACATTGCGCCCGCCAGTATCCTGGCGGGCATGCCTGTTCGAGCGTCATTTCAACCCTCAAGCCCCCGCGGCTTGGTGTTGGGGGCCTGCGCACCGCAGCCCCCTAAAGACAGCGGCGGGCGTGGCCTGGTACCGAACGTAGTAGATTCTACCCTCGTTCGCGGTCCAGGGCGCGCTCCGGCCGGTAAACCCCCATCTTTACAATGGTTGACCTCGGATCAGGTAGGAATACCCGCTGAACTTAA
OTU 427	110	Ascomycota							Ascomycota 5	-	-	-	-						AACGCACATTGCGCTCCTTGGTCTTCCAGGGAGCATGTCTATCCGAGCGTCGTTGCAACTCTCAAGCCTGGCTTGGTCCTGGAGAGCGTCCCGCCCGCGGGACCCCTCCCAAACGCAACTCACGTCGGGCCACTCGGTCGGAGCGCAGCAGATTTGCAGCCCCGTCCGGCGCCGTCGCGAGCCGCCCCGTGCGGATTCTCAAGGTTGACCTCGGATTAGATAAGGATACCCGCTGAACTTAA
OTU 428	109	Ascomycota	Pezizomycotina	Sordariomycetes	Hypocreomycetidae	Hypocreales	Clavicipitaceae		Clavicipitaceae	Saprotroph	Undefined Saprotroph	Possible	Microfungus		UDB035662	SH1552440.08FU	338.1	89.27	AACGCACATTGCGCCCGCCAGTATTCTGGCGGGCATGCCTGTTCGAGCGTCATTTCAACCCTCAAGCCCCAGCGGTTTGGTGTTGGGGACCGGCGAGTACAGAGGCTTTGGGGACTTGTCCCCCTTCCCTCGGCGCCGCCCCCGAAATGAATTGGCGGTCTCGTCGCGGCCTCCTCTGCGTAGTAGCACAACCTCGCATCAGGAGCGCGGCGCGGCCACTGCCGTAAAACGCCCAACTTTTTTTTAAGAGTTGACCTCGAATCAGGTAGGAATACCCGCTGAACTTAA
OTU 429	108	Basidiomycota	Agaricomycotina	Agaricomycetes	Agaricomycetes sbc Incertae sedis	Cantharellales	Ceratobasidiaceae	Ceratobasidium	Ceratobasidium sp.	Pathotroph-Saprotroph-Symbiotroph	Endomycorrhizal-Plant Pathogen-Undefined Saprotroph	Possible	Microfungus		UDB017026	SH1554510.08FU	422.2	92.43	AACGCACCTTGCGCTCCTTGGTATTCCTCGGAGCATGCCTGTTTGAGTATCATGAAATTATCAAAATAAATCTTTCGTTCACTCGATTGATTTTATTTTGGACTTGGGGGTTCTGCAGATTCACGTCTGCTCCTCTTAAATTCATTAGCTGGATCACTGTAGACTCGGTTCCACTCGGCGTGATAAGTATCACTCGCTGAGGACACTCGTAAAAAAGTGGCCGGGACTATTAGAGAACCGCTTCTAATAGTCTATTAGCTTAGACAATTTACTTATGATCTGATCTCAAATCAGGTAGGACTACCCGCTGAACTTAA
OTU 430	108	Ascomycota	Pezizomycotina	Sordariomycetes	Hypocreomycetidae	Hypocreales	Bionectriaceae	Nectriopsis	Nectriopsis lecanodes 1	Pathotroph	Fungal Parasite-Protistan Parasite	Probable	Microfungus		UDB035652	SH1513383.08FU			AACGCACATTGCGCCCGCCAGTACTCTGGCGGGCATGCCTGTCTGAGCGTCATTTCAACCCTCGCGCCCGGCTTCTGTCGGGGGCGGTGTTGGGGATCGGCCTCCCGTCTTTTCGGGCGGCCGGCCCCTAAATGGAGTGGCGACCGCGCCGTAGCCTCCTCTGCGTAGTAGTTAAACACTCGCAGGCGGAGAACAGTGTGGCCTGCCGTAAAACCCCCCACTTTCTAAGGTTGACCTCAGATCAGGTAGGAATACCCGCTGAACTTAA
OTU 431	108	Ascomycota	Pezizomycotina	Leotiomycetes	Leotiomycetidae	Helotiales			Helotiales 1	-	-	-	-		UDB032140	SH1509644.08FU			AACGCACATTGCGCCCCTTGGTATTCCGGGGGGCATGCCTGTTCGAGCGTCATTATAACCCTCAAGCCTAGCTTGGTGTTGGAGCATGCTACCTCAGCAGCTCTTAAAATCAGTGGCAGTACTCTCCGGCTCTAAGCGTAGTAATTCTTCTCGCTATGGAACCCGGAGGGTACGCGCCAGAACCCTCAACTTTCTATGGTTGACCTCGGATCAGGTAGGGATACCCGCTGAACTTAA
OTU 432	106	Basidiomycota	Agaricomycotina	Agaricomycetes	Agaricomycetidae	Agaricales	Clavariaceae	Clavaria	Clavaria argillacea 1	Saprotroph	Undefined Saprotroph	Probable	Clavarioid		UDB034585	SH1648145.08FU			AACGCACCTTGCACCCTCTGGTATTCTGGAGGGTATGCCTGTTTGAGTGTCATTAATCCCTCAACACAAGAAAACTTGTTTCTTGTGCTTGGATAGTGAAGGTTTTGCTGGCGCAAATAACTGTCAGCTCCTTTTAAATGCATTAGCAGAACAGTGCAGGACTGGCCTCAGTTTGATAAGAAATATTTATCTATGCTGTCGCTAGATTTCCTCTTTGTGTTCAGCTTCAAACTGTCTTCGGACTGTCTCTCTTGAGGCAAAATAATTCATTGATCGACCTCAAATCAGGTAGGAATACCCGCTGAACTTAA
OTU 433	106	Ascomycota	Pezizomycotina	Leotiomycetes	Leotiomycetidae	Helotiales			Helotiales	-	-	-	-		UDB027992	SH1522926.08FU	298.6	90.5	AACGCACATTGCGCCCCTTGGTATTCCGAGGGGCATGCCTGTTCGAGCGTCATTACAACCCTCAAGCACTGCTTGGTCTTGGGCTCCGCTGCTAACCCGGCGGGCCTTAAAATGAGTGGCGGCGCCATCGGGCTCTGAGCGTAGTAAATTTCCTCGCTACGGAGTCCTGGTGACGGTGGCCATCAACCCCCAACTTTCTACGTTTGACCTCGGATCAGGTAGGGATACCCGCTGAACTTAA
OTU 434	105	Glomeromycota	Glomeromycotina	Glomeromycetes		Glomerales	Glomeraceae	Glomus	Glomus intraradices 5	Symbiotroph	Arbuscular Mycorrhizal	Highly Probable	NULL				531.0	98.36	AACGCAAATTGCACTCTCTGGCAACCCGGGGAGTATGCCTGTTTGAGGGTCAGTGTTAATAAAAATCGGGTGCGTTGCAATTTTTGTGACGTTTCCGGAGTTTGAGTTATCTTAATTAACTTCGGTTTTTTTAAGAGGCTTAAAATTGACCTTTTTTTGTGCATTTTTAGACGTACATAAATTTTTTTTTTATTCGTCCATCCTAATGCCAAAATCTATTAGATGCGACCATATCTTGTGGTTCCGTGTCTATAAATTTTTCATGATTTGACCTCAAATCAGGTAGGAACACCCGCTGAACTTAA
OTU 435	105	Basidiomycota	Agaricomycotina	Tremellomycetes	Tremellomycetes sbc Incertae sedis	Cystofilobasidiales	Mrakiaceae	Itersonilia	Itersonilia sp.	Pathotroph	Litter Saprotroph-Plant Pathogen	Probable	Yeast-Microfungus		UDB028113	SH1556067.08FU	502.9	96.34	AACGCACCTTGCGCTCCTTGGTATTCCGAGGAGCATGCCTGTTTGAGTGTCATGAAACTCTCAACCTCTGACTTTCTTAATCGTCGGTCAGCGGCTTGGATGTGGGCGCTGCCGGTCTTAATTGATCGGCTCGCCTGAAAAACATTAGCGAATCCCTTCTGTAATCGGTTCCACTCGACGTGATAAGTATTTCGTCGAGGACATCTTTATTGATGGCCGAGATAAAGCTGGTTTAAGATCTGCTTCTAACTCTTTCGTTGCCTTCTGGTAAAGAAAACCCCTCATGATCTGGCCTCAAATCAGGTAGGACTACCCGCTGAACTTAA
OTU 436	105	Mucoromycota							Mucoromycota	-	-	-	-		UDB035691	SH1584792.08FU	180.1	78.15	AACGCATCTTGCGCTCATTGGTATTCCAATGAGCACGCCTGTTTCAGTATCAGAAACACCCCACATTCAAAATCTTTTTTTTTGAATGGAACTGAGCGGCTACGGTAAGGAGAAATCTTTACTGTTCGCTTTAAAATTATTTGGCCTGGAATTTTAGTATTTTCTTTGTTGCCTAAACTTTTTTTTTAATATAAAGGAAAAGCTTAGAAAACTATGCGAAATCTAAAAAGCTTGGGGCCTCCCAAATAAAACATTCTTAAATTTGATCTGAAATCAGGCGGGATTACCCGCTGAACTTAA
OTU 437	105	Chytridiomycota							Chytridiomycota 5	-	-	-	-						AACGCACATTGCACTCTGTTTCGGCAGAGTATGCCTGTTTGAGAATCTATAGTATTCATTCTCCAACCTTGGGTATTTATACCTAGGGAAGGAGAGATTTGAGGCATCGCACTAACCCTGCGTGCTTTTAAAACTATTGCTGCTGGATACTGTCAAGTAACGGAAAAGTATGTGTATGAGACTTCGGTTTCTCTAATACCCAGTACGTGTGGTGGTGTATGTCCGGCACTCAACTATTAAAGGCAACCTCTTGGGGTTGACTTGAACCATGGTCTCAAATCAGGCAGGAAGACCCGCTGAACTTAA
OTU 438	105	Ascomycota	Pezizomycotina	Sordariomycetes	Xylariomycetidae	Xylariales	Xylariaceae		Xylariaceae	Pathotroph-Saprotroph-Symbiotroph	Dung Saprotroph-Endophyte-Plant Pathogen-Undefined Saprotroph	Probable	Xylarioid		UDB027372	SH1585543.08FU	303.7	88.24	AACGCACATTGCGCCCATTAGTATTCTAGTGGGCATGCCTGTTCGAGCGTCATTAATTCCACTTAAGCCTCGCTTAGTGTTGGGAGACTGCTTTAGCGGAGCTACCCTGTAGCTACCCTGCAGCTCCTCAAAGACAGCGGCGGAGTTGTGATATCCTCTGAGCTTAGTAATTTATTCTAGCTTTCGAGTGTACCACTTCCCCTGCCGTTAAACCACCAAATTTTAATGGTTGACCTCGGATCAGGTAGGAATACCCGCTGAACTTAA
OTU 439	104	Basidiomycota	Agaricomycotina	Agaricomycetes	Agaricomycetidae	Agaricales	Lycoperdaceae	Lycoperdon	Lycoperdon subumbrinum	Saprotroph	Undefined Saprotroph	Probable	Gasteroid		UDB037656	SH1556535.08FU	523.5	100.0	AACGCACCTTGCGCTCCTTGGTATTCCGAGGAGCATGCCTGTTTGAGTGTCATTAAATTCTCAACCCCTCCAGCTTTTACGAGTTGTGATGGGCTTGGATATGGGAGTTTGCGGGTCTTTATCAATAAAGGTCAGCTCTCCTGAAATACATTAGCGGAACCGTTTGCAGTCCCGTCACTAGTGTGATAATTATCTACACTGTGATGATTGCTCTCTGACTAGTTCAGCTGCTAATCGTCCACTATGGACAACACTTAATGAACTTCTTGACCTCAAATCAGGTAGGACTACCCGCTGAACTTAA
OTU 440	104	Ascomycota	Pezizomycotina	Eurotiomycetes	Chaetothyriomycetidae	Chaetothyriales	Herpotrichiellaceae	Exophiala	Exophiala sp.	Pathotroph-Saprotroph	Animal Pathogen-Undefined Saprotroph	Probable	Facultative Yeast		UDB027982	SH1635779.08FU	418.7	95.09	AACGCACATTGCGCCCTTTGGTATTCCGAAGGGCATGCCTGTTCGAGCGTCATTATCACCCCTCAAGCCCCCGGCTTGGTGTTGGACGGCTTGGTGGAGACCCCCTCGCGGGTCCCTACCCCTCCCAAAGACAATGACGGCGGCCTCGTTGGACCCCCGGTACACTGAGTTCTTCACGGGACACGTATCGGACACACGGGTTTACGGGCCACGGTCTGCCTCCCCTCAGGGAGAATTTTTTACAAGGTTGACCTCGGATCAGGTAGGGATACCCGCTGAACTTAA
OTU 441	103	Basidiomycota							Basidiomycota	-	-	-	-		UDB036708	SH1555584.08FU	195.6	78.33	AACGCACATTGCACCTTCTGGTAATACAGAGGGTATGCCTGTTTGAGTGTCATTAATCTATCAACACAAGTAATTTATTTTACCTGTGCTTGGATTTTGAGGGTTTGCTGGCATTGGTTTCAGCTCCTTTCAAATACATTAGCAGATCTCAGTATAATCGGCTTTCAGCTTGGTAATTAGATTTATCTGTGCTGTTGCTGAGGAATTTTAAGATCAGCTTTCAAATTGTCCTTTAATCTAGGACTGTCTCAATTAAGAGGCATATATTTGACCTTTGACCTCAAATCAGGTAGGACTACCCGCTGAACTTAA
OTU 442	103	Basidiomycota	Agaricomycotina	Agaricomycetes	Agaricomycetes sbc Incertae sedis	Thelephorales	Thelephoraceae	Tomentella	Tomentella sp.	Symbiotroph	Ectomycorrhizal	Highly Probable	Corticioid	Short or medium-distance smooth subtype f	UDB016307	SH1502353.08FU	401.6	91.4	AACGCACCTTGCGCTCTTTGGCTATTCCGAAGAGCATGCCTGTTTGAGTATCATGAACACCTCAACTCCCATGGTTTGCCATGACGAGCTTGGACTCTGGGGGTCTTGCCGGCCTGTGGTCGGCTCCTCCCAAATGGATCAGCTTACCAGTGTTTGGTGGCATCGCAGGTGTGATAACTATCTACGCTTGCCGTTGCCCGCCAGGTAACCTCCAGTCATGGAGGTTCGCTGGAGCTCATAAACGTCTCTCTTTTACGAGGACAACTTTGTGAACATTTGATCTCAAATCAGGTAGGACTACCCGCTGAACTTAA
OTU 443	103	Ascomycota	Pezizomycotina	Sordariomycetes					Sordariomycetes 1	-	-	-	-		UDB024433	SH1648729.08FU			AACGCACATTGCGCCCGCTAGTATTCTGGCGGGCATGCCTGTTCGAGCGTCATTTCAACCATCAAGCCCCAGGCTTGTGTTGGAGCCCTGCGGCCGTCCGCAGCCTCCTAAAAGCAGTGGCGGGCTCGCTATCACACCGAGTGCAGTAGTTTACTCTTCGCTCAGGACGTGTAGCGGGTTCCAGCCGTGAAACCCCCCAATTTTCAAAGGTTGACCTCGGATCAGGTAGGAATACCCGCTGAACTTAA
OTU 444	103	Ascomycota	Pezizomycotina	Sordariomycetes	Hypocreomycetidae	Hypocreales	Cordycipitaceae	Torrubiella	Torrubiella sp. 1	Pathotroph	Animal Pathogen	Probable	NULL		UDB033201	SH1557178.08FU			AACGCACATTGCGCCCTTTGGTATTCCGAAGGGCATGCCTGTTCGAGCGTCATTTCAAACCTCAAGCTCACGCTTGGTATTGGGCGTCGTCCGCTAGGACGTGCCAGAAACCCGTAGGCAGTGGTGCCCGCCTCCCAGCGTAGTCAATCTACCCGCTTCGGAGCGCGCGGTGCCGCCCGCCAGACGAACAACCCACTATTTTCTATGGTTTGACCTCGGATCAGGTAGGGATACCCGCTGAACTTAA
OTU 445	103	Ascomycota	Pezizomycotina	Leotiomycetes		Phacidiales	Phacidiales incertae sedis	Epithamnolia	Epithamnolia xanthoriae 1	Pathotroph	Lichen Parasite	Probable	Microfungus		UDB019824	SH1509523.08FU			AACGCACATTGCACCTTCTGGTATTCCAGGAGGTATGCCTGTTCGAGCGTCATTTCAACCCTCAAGCCTGGCTTGGTATTGGGCGTCACCCCTAGTGGTGCGCTCTAAAATCAGTGGCGGCGCCGCTTGGCTTCCAGCGTAGTAATTCTCTCGCTGTGGATGCTTGAGCGTGTGCTTGCCAGCTAACCCTCATTTTTTTAAGGTTGACCTCGGATCAGGTAGGGATACCCGCTGAACTTAA
OTU 446	103	Ascomycota	Pezizomycotina	Dothideomycetes	Pleosporomycetidae	Pleosporales	Leptosphaeriaceae	Leptosphaeria	Leptosphaeria sp.	Pathotroph	Plant Pathogen	Probable	NULL		UDB025129	SH1635394.08FU	343.2	92.58	AACGCACATTGCGCCCCTTGGTATTCCATGGGGCATGCCTGTTCGAGCGTCATTTGTACCCTCAAGCTCTGCTTGGTGTTGGGTGTTTGTCCCGCTTTTCGCGTGGACTCGCCTTAAAACAATTGGCAGCCGGCATATTGGCCTGGAGCGCAGCACATTTTGCGCCTCTTGTCATGATTGTTGGCATCCATCAAGACTATTTTTTACTCTTGACCTCGGATCAGGTAGGGATACCCGCTGAACTTAA
